# Supplementary material for: Reviews and syntheses: Weathering of silicate minerals in soils and watersheds: Parameterization of the weathering kinetics module in the PROFILE and ForSAFE models
Source: Copernicus journal article supplement (doi:10.5194/bg-2019-38), 2019-02-18
Supplement: Supplementary file [file bg-2019-38-AC4-supplement.pdf]

# Reviews and synthesis: Weathering of silicate minerals in soils and watersheds: Parameterization of the weathering kinetics module in the PROFILE and ForSAFE models

Harald Ulrik Sverdrup<sup>1\*</sup>, Eric H. Oelkers<sup>2,3</sup> Martin Erlandsson Lampa<sup>4</sup>,  
Salim Belyazid<sup>4</sup>, Daniel Kurz<sup>5</sup>, Cecilia Akselsson<sup>6</sup>,

1-Industrial Engineering, University of Iceland, Reykjavik, Iceland, 2-Earth Sciences, University College London, Gower Street, WC1E 6BT, London, UK, 3-CNRS, UMR 5563, Toulouse, France, 4-Institute of Hydrology, University of Uppsala, Uppsala, Sweden, 5-Physical Geography, Stockholm University, Stockholm, Sweden, 5-EKG Geoscience, Bern, Switzerland, 6-Earth Sciences, University of Lund, Lund, Sweden. \*corresponding author (hus@hi.is)

## Abstract

The PROFILE model, now incorporated in the ForSAFE model can accurately reproduce the chemical and mineralogical evolution of the soil unsaturated zone. However, in deeper soil layers and in groundwater systems, it overestimates weathering rates. This overestimation has been corrected by improving the kinetic expression describing mineral dissolution by adding or upgrading ‘breaking functions’. The base cation and aluminium brakes have been strengthened, and an additional silicate brake has been developed, improving the ability to describe mineral-water reactions in deeper soils. These brakes are developed from a molecular-level model of the dissolution mechanisms. Equations, parameters and constants describing mineral dissolution kinetics have now been obtained for 102 different minerals from 12 major structural groups, comprising all types of minerals encountered in most soils. The PROFILE and ForSAFE weathering sub-model was extended to cover two-dimensional catchments, both in the vertical and the horizontal direction, including the hydrology. Comparisons between this improved model and field observations are available in Erlandsson Lampa et al. (2019, This special issue). The results showed that the incorporation of a braking effect of silica concentrations was necessary and helps obtain more accurate descriptions of soil evolution rates at greater depths and within the saturated zone.

## 1. Introduction

This manuscript aims to review and clarify the chemical weathering approach adopted by the PROFILE and ForSAFE models. In particular, this contribution describes continuing efforts to upgrade the kinetic databases of these models for improved model calculations.

Chemical weathering of silicate minerals, and notably the dissolution rates of these minerals are one of the most important factors shaping soil chemistry. The quality of the kinetic database in most cases determines the quality of simulations of soil evolution. In the 1980’s, the need arose to mitigate acid deposition, to set critical loads for acid deposition, and to set limits for sustainable forest growth and nitrogen critical loads. As a consequence, a major research effort was begun. This effort led to a re-evaluation of the weathering observations made available in scientific publications and books (Sverdrup 1990, Sverdrup and Warfvinge 1992, 1993, 1995, Drever et al., 1994, Drever and Clow 1995, Ganor et al., 2005, Svoboda-Colberg and Drever 1993, Crundwell 2013). These observations led to a model that accurately reproduced weathering rates under field conditions. The first steps and the narrative of the development were reported by Sverdrup and Warfvinge (1988a,b, 1992, 1993, 1995) and Sverdrup (1990). In 1990, we had a set of equations that described the rates 14 minerals (K-feldspar, albite, plagioclase, pyroxene, hornblende, garnet, epidote, chlorite, biotite, muscovite, vermiculite, apatite, kaolinite, and calcite). Later more silicate minerals were added, minerals including illite-1, illite-2, illite-3, smectite, montmorillonite, sericite and rich volcanic glass

and poor volcanic glass, and eventually 45 additional silicate minerals where we had full kinetic data. In addition, we had full kinetic data for 25 different carbonates<sup>1</sup> at the time.

By the middle of the 1980's, it became clear that we did not have a standard procedure for building a weathering rate model based on molecular level mechanisms. There are many reasons for this the most important was the lack of a mechanistically oriented approach for guiding experimental studies at the time. The lack of an understanding of the mechanisms, resulted in important factors being overlooked. Many essential variables were missing in the older experimental studies, sample preparation was often inadequate or not done, and/or the material was inadequately characterized (Sverdrup et al., 1981, 1984, Sverdrup, 1990). Often the experimental design had significant flaws and many experiments ran for too short a time; see Sverdrup (1990) for a full description. As such there needed to be a sorting of the data, to avoid the confusion brought by misleading data. This effort lead to the creation of the original PROFILE mineral kinetic weathering model (Sverdrup, 1990) to estimate the rate at which mineral dissolution provided essential cations to soil waters. Although this model provides accurate estimates for shallow soils, it became less accurate for deeper soils (e.g. > 1.5 meter soil depth).

This report outlines our efforts to update these early mineral weathering kinetics models for watershed water chemistry and deeper groundwater. This effort is the result of preparations for, discussions at, and subsequent efforts after a workshop held at Ystad Saltsjöbad, Ystad, Sweden, April 11-14, 2016, in connection to the Swedish QWARTS research programme. Key literature to read to aid in following this text are the weathering book by Sverdrup (1990) and the articles Sverdrup and Warfvinge (1988a,b, 1992, 1995) and Warfvinge and Sverdrup (1993). There is an advisory chapter on how to operationally estimate weathering rates in soils on a regional scale in Europe in the United Nations Economic Commission for Europe, Long Range Transboundary Convention Mapping Manual for Critical loads (Sverdrup, 1996). The weathering rate mapping methodology was tested and used throughout 26 different European countries, and peer reviewed at annual workshops from 1988 to 2017. Weathering rates in forest soils and open terrestrial ecosystem have been mapped during the period 1990 to the present (2019). The UN/ECE-LRTAP Critical loads and levels Mapping Manual was updated biannually during the period.

The revision of the original weathering rate models was motivated by several observations:

1. The PROFILE model was found to work satisfactorily in the unsaturated zone (0-1 meter), on thin soils, on rock surfaces, and in low concentration systems (Sverdrup and Warfvinge 1988a,b, 1991, 1992, 1993, 1995, 1998, Sverdrup 1990, Sverdrup et al., 1998, Hettelingh et al., 1992, Alveteg et al., 1996, 1998, 2000, Alveteg and Sverdrup 2000).
2. However, the chemical weathering rate for minerals is overestimated by this model in deeper soils, and at depths of more than 1.5 meters. The original PROFILE model was used down to this depth (Sverdrup et al., 1988a,b, 1992, 1996, Sverdrup 1990, Janicki et al., 1993, Holmqvist et al., 2003) for critical loads for streams (Sverdrup et al., 1996) and groundwater (Warfvinge et al., 1987), and may have possibly resulted in overestimates of the critical load.
3. The weathering rate is overestimated in the deeper soils and in ground water (Sverdrup 1990, Warfvinge and Sverdrup 1987, 1992a,b,c, Sverdrup et al., 1996).
4. New experimental data published in the literature after 1995 is of far better quality and consistency, with better experimental designs, better characterized materials and more complete observations than previous studies. For example, the reader is encouraged to read two studies published by Holmqvist et al., (2002, 2003) on the weathering rates of clay minerals under soil conditions and the concept of mineral alteration sequences (Holmqvist 2004, PhD thesis from Chemical Engineering, Lund University). The minerals used in the weathering rate experiments in those studies were extracted and separated from in-situ soils at experimental field sites near Uppsala, Sweden.

---

<sup>1</sup>**Calcite** (The calcites are all slightly different; CaCO<sub>3</sub> with 0-3% MgCO<sub>3</sub> and 0.05%-0.5% apatite, from Sweden, Norway, Denmark, and the United States. In addition, kinetics on **aragonite** (CaCO<sub>3</sub>), **slavsonite** (SrCO<sub>3</sub>), **dolomite** (CaMg(CO<sub>3</sub>)<sub>2</sub>), **magnesite** (MgCO<sub>3</sub>), **brucite** (MgOH), **siderite** (FeCO<sub>3</sub>), **witherite** (BaCO<sub>3</sub>), and **rhodochrosite** (MnCO<sub>3</sub>) is available.

## 2. Scope and objectives

The scope of this study is to describe the updated mineral kinetics database used in the PROFILE and ForSAFE models, and describe how the model has been improved during the past several years. Notably this update includes revised ‘brake functions’ in the kinetic rate equations to better fit the observed field data down to the groundwater table and below. This was necessitated when the ForSAFE model (thus also the PROFILE model) was reconfigured for a sloping catchment, expanding the model structure from a 1-dimensional to a 2-dimensional model accounting for vertical and horizontal solute transport in a catchment, including the ecosystem. In total 102 minerals are considered in the updated and expanded kinetics parameter databases. An exhaustive description of the parameterization of the rate equations for all of the 102 minerals will require a text far beyond what is possible in this manuscript, so that only a summary and several examples are provided here.

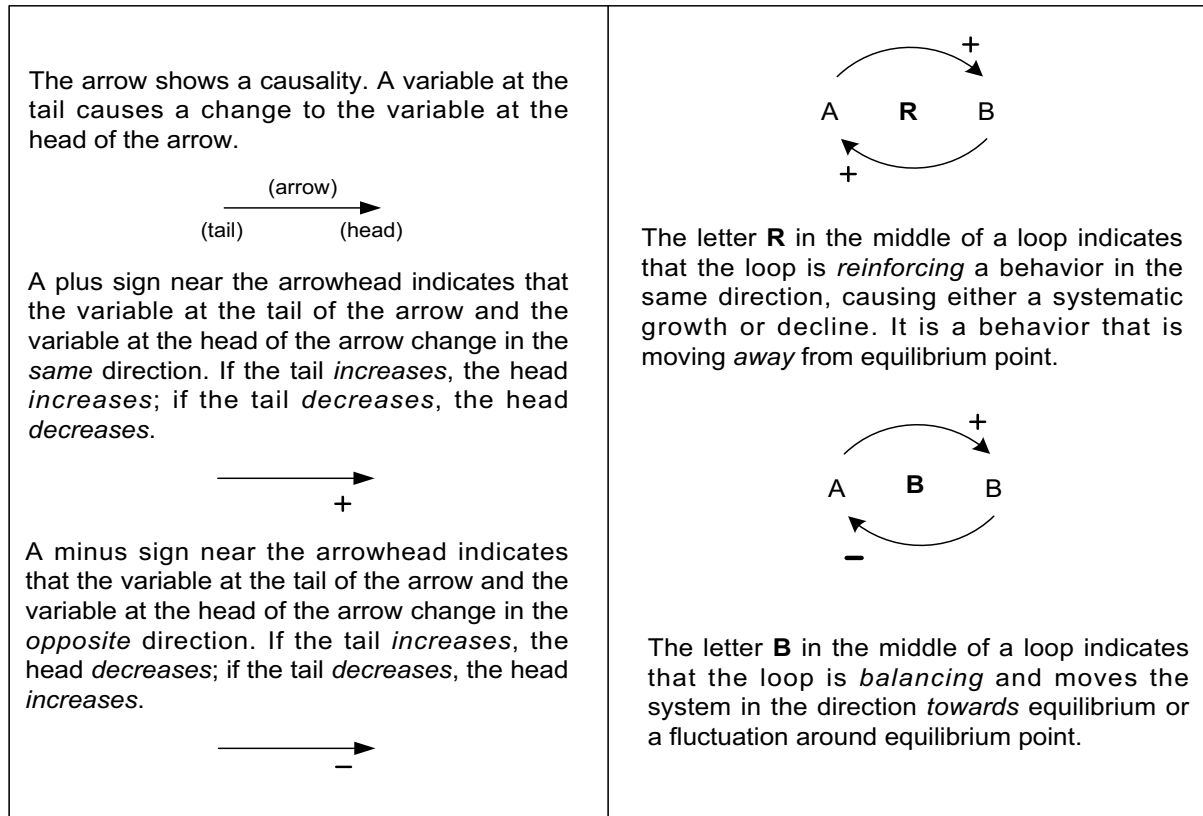

Figure 1. Weathering processes were mapped using systems analysis and by drawing causal loop diagrams (CLD) for the process and the whole system of the weathering process. This is a standard procedure in model building (Sverdrup and Stiernquist 2002, Sverdrup et al., 2018). *B* is a balancing loop and *R* is a reinforcing loop as explained in the figure.

## 3. Methodology

The methods used in this study have their basis in terrestrial ecosystems system analysis and ecosystems system dynamics as described by Sverdrup and Stiernquist (2002) and Sverdrup et al., (2018). The main tools employed are the standard methods of system analysis and integrated system dynamics modelling (Forrester 1961, 1969, 1971, Meadows et al., 1972, 1974, 1992, 2005, Roberts et al., 1982, Senge 1990, Bossel 1998, Haraldsson and Sverdrup 2005, Haraldsson et al., 2006, Sverdrup and Stiernquist 2002, Sverdrup et al., 2018). The overall system is analysed using stock-and-flow charts and causal loop diagrams (Sverdrup et al., 2002). The learning loop was used as the adaptive learning procedure in past studies (Senge 1990, Kim 1992, Senge et al., 2008, Sverdrup et al., 2018). The conceptual model must be clearly defined and constructed before any computational work can be undertaken. It is fundamental to understand that the causal understanding is the model. Systems analysis produces a causal loop diagram (CLD) linking causes, effects, and feedbacks among the processes in terms of causalities and flows (Albin 1997, Sverdrup et al., 2018, Kim 1992). These CLD

need to be internally consistent. A summary of this approach is provided in Figure 1. A causal loop diagram is thus a map of the underlying differential equations describing the evolution of the system. Mass- or energy flow charts and the causal loop diagram uniquely define the system. The ForSAFE model is not calibrated on large amounts of system output data (Sverdrup and Warfvinge 1992, Sverdrup et al., 2018). Instead, the underlying system causal linkages and the mass balances, lead to characteristic equations that are parameterized using independent system properties, initial states and boundary conditions (Sverdrup et al., 2018).

### **3.1 Earlier development work and background**

Critical to developing a database describing mineral dissolution rates is that it is coupled together into a comprehensive model that can account for the large number of processes that affect rates in the field. From the beginning, weathering kinetics was developed and incorporated into the PROFILE model. The kinetics were parameterized using laboratory measurements and applied to field conditions on a plot scale and on a regional scale for Sweden (Sverdrup 1990, Sverdrup and Warfvinge 1988a,b, 1992, 1995, Warfvinge and Sverdrup 1992, 1993). The resulting kinetics sub-model was subsequently coupled into a biogeochemical ecosystem model, linking solute transport, soil chemistry, weathering, ion exchange, hydrology and biological interactions with microbiology and forest plants, called the SAFE model (Sverdrup et al., 1995). The steady-state model PROFILE and its dynamic variant SAFE, was further developed into ForSAFE and ForSAFE-VEG with full ecosystems subroutines, and full base cation nutrients, phosphorus, nitrogen and carbon cycles (Sverdrup and Warfvinge 1996, Sverdrup et al., 2005, 2007, 2008, 2012, 2014, Belyazid et al., 2005, 2007, 2008, 2010, 2011a,b, 2014, McDonnell et al., 2014, 2015, Bonten et al., 2014, Probst et al., 2014, Rizzetto et al., 2017). A description of the original weathering kinetics sub-model was published by Sverdrup (1990). However, much additional experimental data has been obtained since.

### **3.2. Weathering under field conditions**

The dissolution of primary minerals at ambient temperature and pressure is irreversible with the exceptions of a few simple chloride and sulphate salts and a few carbonates (Sverdrup 1990). Such irreversible reactions do not attain equilibrium in near to ambient temperate systems. A formulation based on transition state theory for the formation of activated surface complexes that decay irreversibly was developed by (Sverdrup 1985, Sverdrup and Warfvinge 1987, 1988a,b, 1992, Sverdrup 1990). Removal of ions takes place through precipitation of amorphous secondary phases, solute transport and uptake to trees and ground vegetation. The modelling of weathering under field conditions can only be performed with an integrated ecosystems model where mineral reaction rates are coupled to solute transport, ion exchange, plant nutrient uptake, organic matter decomposition and nitrogen transformations have been included (Sverdrup and Warfvinge 1988a,b, Sverdrup 1990, Akselsson et al., 2006, 2005, 2004, Sverdrup et al., 1990, 1995, 2017). A comparison of calculated and observed weathering rates shown in Figure 2, demonstrates this approach can reproduce the observed rates within  $\pm 5\%$  across 4 orders of magnitude for the upper unsaturated parts of a soil (Sverdrup and Warfvinge 1992, Barkman et al., 1999, Jönsson et al., 1995, Belyazid 2005, Kurz et al., 1998a,b). Further comparisons of computed and calculated rates made with these models for field tests at Gårdsjön, Sweden and at various sites were published by Sverdrup et al. (1988a,b, 1993, 1995, 1996, 1998, 2010), Sverdrup (1990, 2009), Sverdrup and Alveteg (1998), Rietz (1995) and Warfvinge et al., (1996), and Holmqvist et al., (2003, 2002). In addition, several other authors tested this approach independently (In the United States; Kolka et al 1996, Phelan et al., 2014, in Scotland; Langan et al. 2006, in Germany; Becker 2002, in New Zealand: Zabowski et al., 2007. tests on controlled experiments with granite slabs in the Swedish nuclear waste storage assessment research programme at Göteborg by Claesson-Nyström and Andersson 1996, in Swedish soil profiles; Lång 1998). Gunnar Jacks in KTH, Stockholm put these models to several blind test of the alteration of blank granite surfaces used for ancient rock carvings and controlled mini-catchments (Jacks, unpublished 1990). In each case a close correspondence was observed in calculated as compared to the field weathering rates.

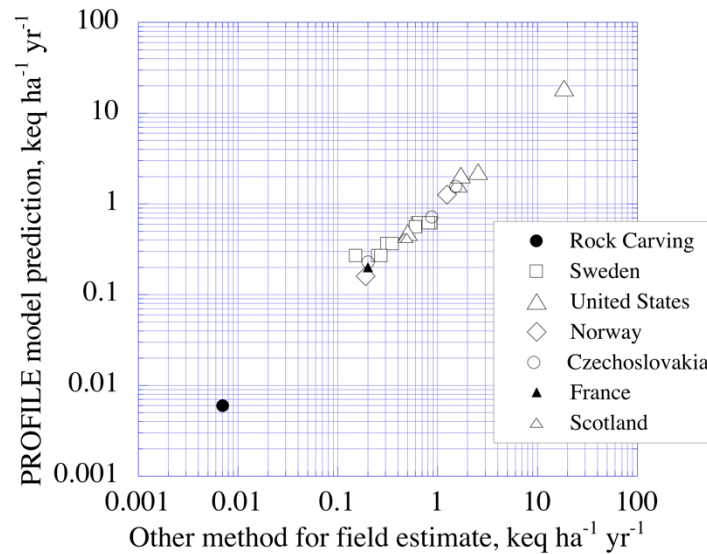

Figure 2. Comparison of weathering rates calculated using the original PROFILE model with corresponding rates obtained from field observations of the upper undersaturated parts of soils. Rates shown were reported or compiled by Sverdrup and Warfvinge (1988a,b, 1991, 1992, 1993, 1995, 1998), Sverdrup (1990), Sverdrup et al. (1990, 1998), Hettelingh et al. (1992), Barkmann et al. (1999), Holmqvist et al. (2003). The model test was performed on shallow soil profiles, no deeper than 0.6 meter.

In 1988, these various models were used to map the weathering rates of the upper 0.5 meter of forest soils of Sweden. The first weathering rate map was based on 28 sites where complete data were collected and extrapolated over the whole country using geological maps (Sverdrup and Warfvinge 1988a,b). This map was later enlarged to 1,306 sites and aligned in distinct geological provinces (Warfvinge and Sverdrup 1993, 1995). The database was subsequently extended to 1,884 forested sites, and finally this was expanded through a five-year sampling and analysis program within the Swedish Forest Inventory soil sampling program to approximately first 17,600 forest soil samples and finally to 27,500 forest soil sites across Sweden (Sverdrup and Warfvinge 1988a,b, 1992, Warfvinge et al., 1992, Warfvinge and Sverdrup 1995, Alveteg et al., 1996, 1998, 2000, Akselsson et al., 2004, 2005, 2006, 2007a,b,c, 2018, 2016, Lång 1995). These results were later complemented with about 3,000 additional sites across the agricultural soils. Later the weathering rates of other countries were mapped for the forest soils of Switzerland (Kurz et al., 1998a,b, 2001), France (Probst et al., 2015, Rizzetto et al., 2016a,b, Gaudio et al., 2015), China (Duan et al., 2002), Finland (Sverdrup et al., 1992) and Denmark (Sverdrup et al., 1992), Maryland (Sverdrup et al., 1996), North-western Russia and Far East Siberia (Semenov et al., 2000), Pennsylvania (Phelan et al., 2014, 2016), New York, Maine, Vermont (Sverdrup et al., 2014, Belyazid et al., 2015), New Hampshire (Sverdrup et al., 2012, Belyazid et al., 2015), Madrid Country (Ballesta et al., 1996), Scotland (Langan et al., 1996a, b), Wales (Langan et al., 1996a), Slovakia (Zavodski et al., 1995), Quebec (Augustin et al., 2016), and Poland (Malek et al., 2005). Further reports on regional use are available in the UN/EC CCE Annual Reports on mapping critical loads for the years 1995-2018. Further contributions to the developments of these models were made from scientists located at the Institute of Ecology and Lund University, in Bern, Switzerland, at the department of Soil Sciences, Swedish Agricultural University, and at the Physical Geography department of Stockholm University. The weathering rate map of the upper 0.5 meter of forest soils of Sweden is displayed in Figure 3. The grid size is 8.2 km<sup>2</sup> or approximately a 3x3km grid in the forested area (Akselsson et al., 2006, 2005, 2004, 2016, Sverdrup et al., 2017). Tests in many other parts of the world, suggests that the model is applicable to the unsaturated zone of any freely draining soil.

The accuracy of the model, depends on the parameterization of its input data. Under very controlled circumstances, the model predictions are actually very precise ( $\pm 5\%$  or better). The main uncertainties when the model is applied to forest plots, watersheds or larger landscape squares. Then the main inaccuracy of the estimates originate in the generalization of soil parameter (such as mineral

surface area) estimates in larger areas, as well as how the outputs (valid for the area used) are interpreted. But these inaccuracies are external to the model (Akselsson et al., 2006, 2005, 2004).

The source of statistical uncertainty in regional weathering estimates were carefully worked out by Walse et al. (1996), and later by Barkman et al. (1996). Holmquist et al. (2020) further elaborate on this using large databases and assessing the geostatistical properties of the landscape. When the model system is used over very many points in a landscape, the uncertainties will to some degree cancel (Holmquist et al., 2002).

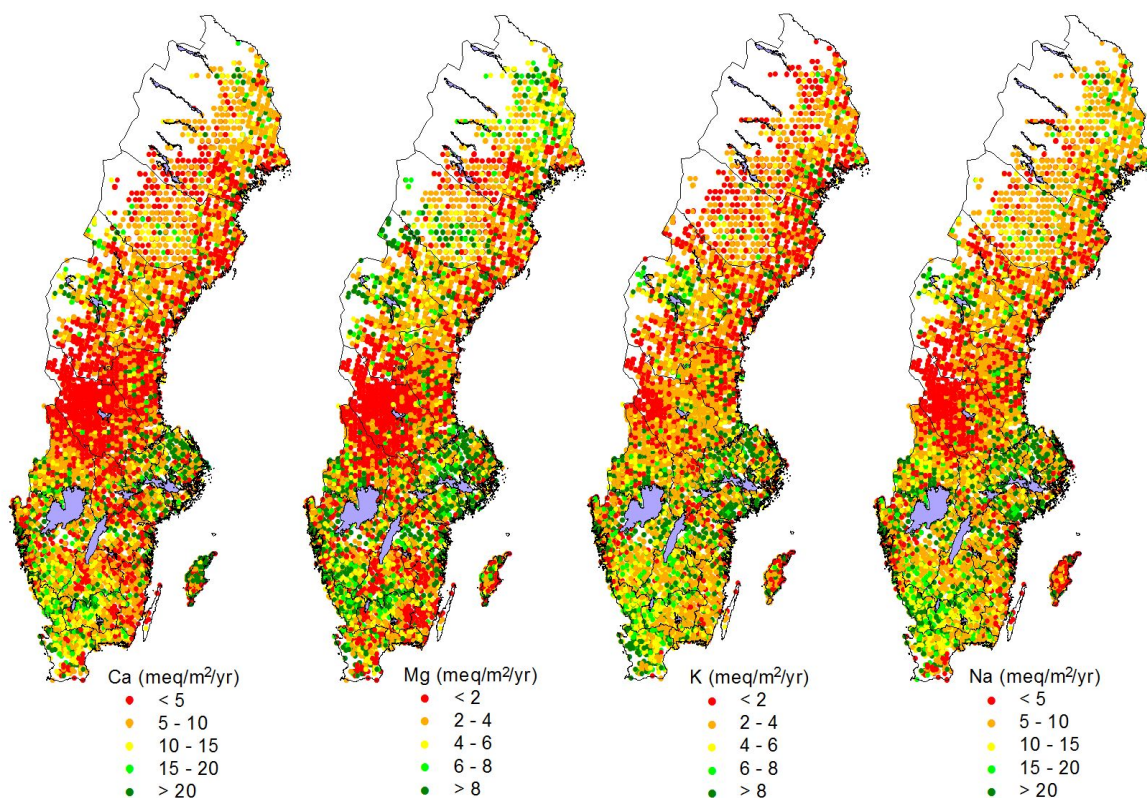

Figure 3. Map of base cation release rates from chemical weathering of soil minerals in the upper 0.5 m of the soil in Sweden determined using the PROFILE model. The model accurately reproduces weathering rates in the upper soil layers, and provides useful estimates for soils of up to 1 meter in thickness. The map was created by Dr. Cecilia Akselsson at Lund University for Swedish forest sustainability assessments and critical loads for acid depositions (Akselsson et al., 2006, 2005, 2004, 2016, Sverdrup et al., 2017).

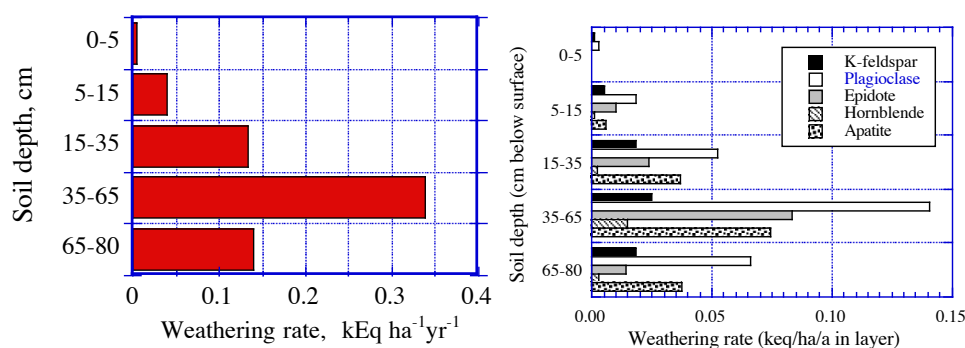

Figure 4. The diagram shows the weathering rate distributed among minerals, the diagram to the right shows the total rate, plotted as the sum of base cations released to the aqueous phase as a function of depth down a soil profile. The diagram to the left shows how selected minerals contribute to this overall rate. The site is catchment F1 at the Gårdsjön Research site, Sweden (Adapted from Sverdrup and Warfvinge 1992, 1995).



Figure 4 shows an example from the Gårdsjön research site in Sweden (Sverdrup et al., 1992, 1993, 1998). The diagram shows the weathering rate distributed among minerals, and the total rate as a function of depth down a soil profile. The example shows the weathering rate at catchment F1 at the Gårdsjön Research site, Sweden (Sverdrup et al., 1992, 1993, 1996). The research site at Gårdsjön, near Göteborg, Sweden has played a key role in the development of our biogeochemical ecosystem models. The research site is one of Sweden's most important field research sites for soils, soil chemistry, material fluxes, geology, mineralogy, ecology, forestry and environmental pollution research, with nearly all aspects excellently documented and recorded for the last 40 years (Hultberg et al., 2007). Here the soil biogeochemistry models were tested, adapted and used for assessments, using the large amounts of data from this intensively monitored research site. Differences in calculated and observed weathering rates became evident when calculating weathering rates for deeper layers. Notably, the model overestimates the weathering rate at depths below 1-1.5 meters. The reason for the overestimation, is that the brake functions applied earlier in the kinetic model are not strong enough deeper in the soil when the silica concentrations are elevated. At that time no silicate break functions were present in the model.

Figure 5 shows an example of a soil weathering simulation of the weathering rate at Niwot Ridge, Rocky Mountain National Park, Colorado for four different environmental pollution scenarios with background acid deposition, current policy, no pollution control and elevated temperature from climate change. The weathering rate is reduced under the climate change scenario. The weathering rate is somewhat increased by the increase in temperature, but more reduced by reduced rainfall leading to drier soils at the site. The ForSAFE model was used with a daily time step, estimating a weathering rate every day. The time-step is numerically determined by the stiffness of the differential equations in the system. The time-step is set automatically by the model numeric routine and thus is variable and is optimized during integration. Under conditions where short-term changes happen, the time-step may be on the scale of hours.

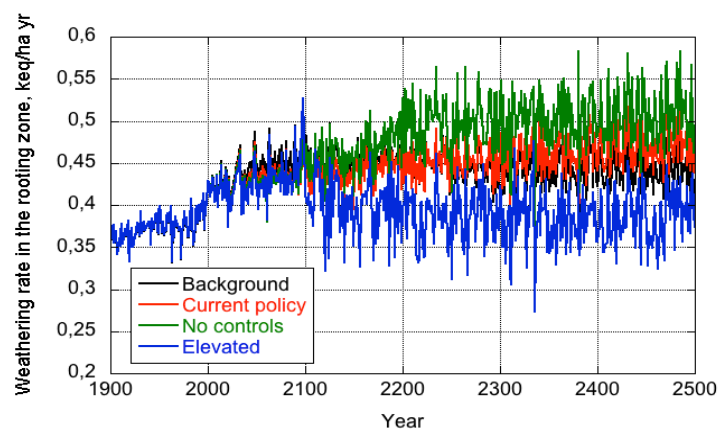

Figure 5. Example of a soil weathering rate calculation for Niwot Ridge, Rock Mountain National Park, Colorado for four different environmental pollution scenarios and their effect on the ecosystems (trees and biodiversity): 1) background acid deposition from sulphur and nitrogen, 2) current policy, 3) no pollution control and 4) elevated temperature. The weathering rate, here reported in terms of the equivalents of the sum of base cation released (See section 4.1), was extracted from the simulations to assess the site for pollution control. In this case the ForSAFE model was used with a daily time step to estimate daily weathering rates (Sverdrup et al., 2014, McDonnell et al., 2017, Belyazid et al., 2019).

### 3.3. Weathering Model overview

A number of computational weathering models are based on PROFILE approach. To clarify these models and their interconnections the following list is provided

#### 1. Steady-state weathering rate models

- a. 1987-1995; Warfvinge P. and Sverdrup, H.; The single site version of the **PROFILE**

model for the calculation and mapping of critical loads and rates of field chemical weathering was developed. It has been validated and used operationally in more than 50 countries worldwide. It uses laboratory generated kinetic models and coefficients to predict field weathering rates. The interface software for PROFILE became outdated, thus, this version is no longer available.

- b. 1992-present; Sverdrup, H., Warfvinge, P., Alveteg, M., Walse, C., Kurz, P., Posch, M., Belyazid, S.; The code **RegionalPROFILE** was developed. This code is a regionalized version of PROFILE, used for creating weathering rate maps for soils and catchments across regions and countries, as well as to estimate critical loads for forest soils. Updated versions of the code are available upon request from Sverdrup, Akselsson or Belyazid.
- c. 2000; Sverdrup, H. and Alveteg, M., The **CLAY-PROFILE** code was developed. This model was made for volcanic and clayey agricultural soils. This code is no longer operable. Archived, the code is available upon written request from Sverdrup or Belyazid.

## 2. Dynamic weathering models

- a. 1987-2008; Warfvinge P., Sverdrup, H., Alveteg, M., Walse, C., Martinsson, L.: The **SAFE** model and its helper routine **MakeDep** were created. **SAFE** is a generally applicable dynamic soil chemistry and acidification model. This tool is used worldwide for acidification research, forest sustainability assessments and for mapping critical loads.
- b. 1995-1996; Rietz, F., Sverdrup, H., Warfvinge, P.; The **SkogsSAFE** model was developed. This long-term dynamic model simulates soil genesis, mineralogy dynamics, soil chemistry and base cation release from chemical weathering in soils over time since the most recent glaciation (14,000 years ago to present) (Rietz 1995, Warfvinge et al., 1996). This code is written in FORTRAN. This code and its databases are available upon written request from Sverdrup.
- c. 1996-2004; Sverdrup, H., Wallman P., Belyazid, S., Alveteg, M., Walse, C., Martinsson, L.: These scientists developed **ForSAFE**, an integrated biogeochemical forest ecosystem model for growth, nitrogen and carbon cycling. This code is written in FORTRAN code, and the code is available upon written request from Sverdrup or Belyazid.

## 3. Regional mineralogy estimation

- a. 1990; Sverdrup, H., Melkerud, P. A., Kurz, D.: The **UPPSALA** model was developed for the reconstruction of soil mineralogy from soil total analysis data. This model is run in a spreadsheet. It is available upon written request from Sverdrup.
- b. 1998; Sverdrup, H. and Erdogan, B. The **Turkey** mineral depletion model (TMD) was developed. This model estimates soil mineralogy from bedrock geology and estimates of soil age. This code is written in STELLA<sup>®</sup>. It is archived and available upon written request from Sverdrup.
- c. 2005-2010; Posch, M., Kurz, D., Alveteg, M., Akselsson, C., Eggenberger, U., Holmqvist, J; 2007 **A2M**, a model to quantify mineralogy from geochemical analyses was developed. This code is available on-line from doi:10.1016/j.cageo.2006.08.007, <https://dl.acm.org/citation.cfm?id=1231715> or from Kurz or Akselsson (Posch et al., 2006, 2007).

These models are not commercial products. They do not have ready-made handbooks (only the early single site PROFILE models had a good users interface and a user's manual). The models are available, but the best option to learn how to run these get training from the contact scientists in how to operate the models and how to set up the input data for a site or a region. The core code is written in FORTRAN.

## 4. Theory

The kinetic weathering model presented in this manuscript originates from that of Sverdrup and Warfvinge (1987a,b, 1988a,b, 1992a, 1995) and Sverdrup (1990), but numerous features have been added since. Some of the updates have been described in later studies (Akselsson et al., 2005, 2005, 2006, 2007, Alveteg et al., 2000, Kurz et al., 1998a,b, Sverdrup et al., 1997, 2002, 2008). Further updates are described in this study. New weathering rate data published over the past 25 years have been regressed and new temperature dependencies and modifications of some rate coefficients



has resulted (Sverdrup 2010, Sverdrup et al., 1998, Rizzetto et al., 2016, Holmqvist et al., 2002, 2003). The mineralogy and surface area inputs are based on site measurements, and in general are not adjustable parameters. Some of parameters can be challenging to measure, such as some primary minerals with low soil content (apatite, epidote, pyroxene, amphiboles, garnets accurate to 0.1%), or mineral surface area. However, getting accurate field estimates of the weathering rates is also challenging, as it requires making many assumptions, so may be of limited accuracy. Thus, we are comparing uncertain model estimates with equally or more uncertain field estimates at the best (Sverdrup et al., 1998).

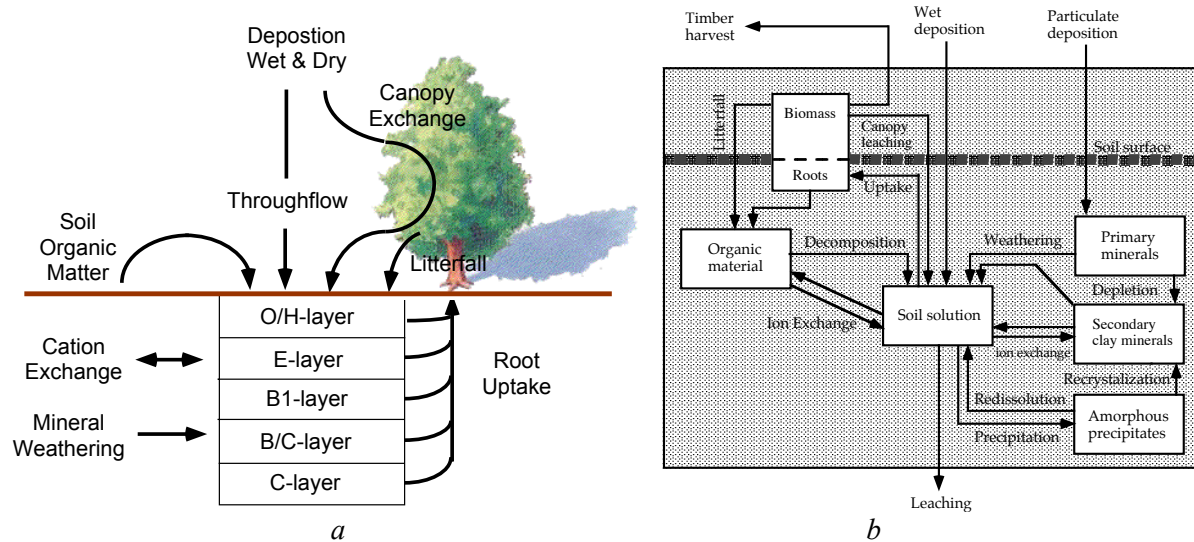

Figure 6. Overview of the PROFILE model. The original PROFILE model operates with a number of layers, and a vertical percolation of water. A set of processes take place in every layer. (b) A look inside PROFILE, showing how weathering is connected with other ecosystem processes (Sverdrup and Warfvinge 1995).

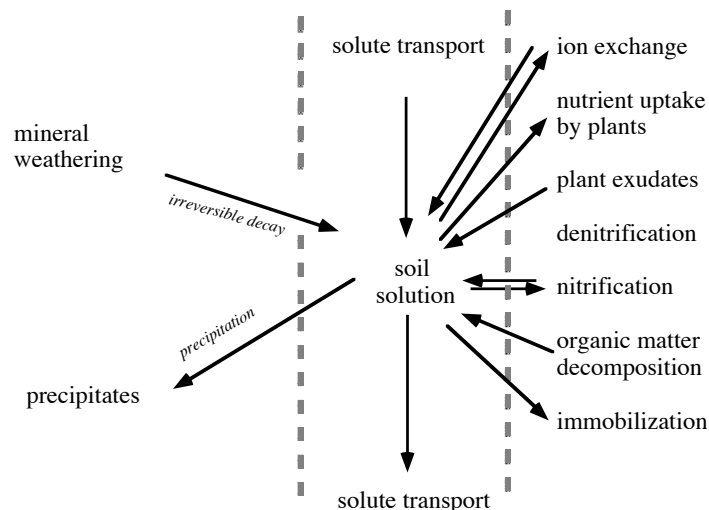

Figure 7. Different soil processes communicate with the weathering processes via the soil solution. (Sverdrup et al., 2002).

The main ForSAFE model is calibrated on two variables, 1) the initial base cation saturation in the fluid phase adjusted to its an initial value at the starting simulation time to insure the cation concentrations are consistent with the observed base cation saturation, and 2) the initial stock of nitrogen in the soil adjusted to match that currently observed in the system. Once this calibration is complete, the ForSAFE model can calculate weathering rates from its kinetics database (Sverdrup et al., 1996, 1998, 2007) and the soil inputs. The ForSAFE model must be provided site specific characteristics like soil mineralogy, soil layering, soil density, soil mineral surface areas, hydrological

characteristics, site temperature, ecosystem characteristics (trees, plants), typical inputs of rain, chemistry of that rain and the amount of the major deposited pollutants.

#### 4.1. Defining chemical weathering

Weathering neutralizes acids (neutralizing all or part of acid rain) and provides nutrients for vegetation (e.g.  $\text{Ca}^{2+}$ ,  $\text{Mg}^{2+}$ ,  $\text{K}^+$ ,  $\text{PO}_4$ ) (Sverdrup 1990, Sverdrup and Warfvinge 1995, Sverdrup et al., 2002). Thus weathering rates are defined as “the base cation release rates from the chemical weathering of minerals”, “plant nutrient base cation release rates from the chemical weathering of minerals” or “the rate of acid neutralization by chemical weathering of soil minerals”. Only secondarily were we interested in loss of minerals and soil profile development (Rietz 1995, Warfvinge et al., 1996, Sverdrup et al., 1996, 2002). Thus, the weathering rates have been expressed as the sum of the release rates of base cations ( $\text{Ca}^{2+}$ ,  $\text{Mg}^{2+}$ ,  $\text{K}^+$ ,  $\text{Na}^+$ ) from the process. This is linked to the destruction of minerals, though results are generally expressed in these terms.

#### 4.2. Mineral weathering rates

The weathering rate of a mineral,  $r$ , defined here as its dissolution rate, is assumed to stem from the sum of 5 simultaneous chemical reactions, involving the mineral surface and either aqueous  $\text{H}^+$ ,  $\text{H}_2\text{O}$ ,  $\text{OH}^-$ , organic acid ligands, or  $\text{CO}_2$ . Assuming that the reactions occur at distinct active mineral surface sites, they can be summed linearly in accord with (Sverdrup 1990, Sverdrup and Warfvinge 1995):

$$R_W = \sum_{j=1}^{\text{Minerals}} A_j * \sum_{i=1}^{\text{Dissolution reactions}} r_i \quad (1a)$$

where  $R_W$  stands for the soil weathering rate in a single soil layer.  $A_j$  refers to the soil mineral surface available for dissolution for each mineral  $j$  considered,  $r_i$  designates the rate of the individual chemical reactions  $i$ . If some reactions occupy the same active mineral surface sites, the expression given above would change to a quadratic sum. Note that the results of the two equations are quite similar, so that the importance of knowing if several reactions operate of the same surface site is relatively small. For the whole soil profile the rates are summed over the different soil layers with depth and we get:

$$R_{\text{Soil}} = \sum_{s=1}^{\text{Layers}} R_{W,s} \quad (2)$$

where  $R_{\text{Soil}}$  denotes the weathering rate in the whole soil profile, and  $s$  represents the layer number. Evidence that the  $\text{H}^+$ ,  $\text{H}_2\text{O}$  and  $\text{OH}^-$  reactions take place at distinct surface sites has been reviewed by Sverdrup (1990) and again by Holmqvist et al., (2003). The  $\text{H}_2\text{O}$ , the organic reaction and the  $\text{CO}_2$  reactions may occur at the same sites, but considering the available data, we have assumed that they occur at distinct sites and thus favour a linear sum of rates. More on these assumptions have been reported by Sverdrup (1990), Sverdrup and Warfvinge (1995), and Holmqvist et al. (2002, 2003).

#### 4.3. Field weathering rates

To estimate field weathering rates using laboratory determined kinetic coefficients, an ecosystem model is required to scale the process to field conditions. This ecosystem model includes effects of climate, soil morphology, plants, trees, microbiology in the soil and fungi (Lin et al., 2017, Smits and Wallander 2016, Smits et al., 2014). An ecosystem model is incorporated within PROFILE and ForSAFE (Sverdrup and Warfvinge 1988a,b, 1991, 1992, 1993, 1995, 1998, Sverdrup 1990, Sverdrup et al., 1998, Hettelingh et al., 1992, Barkmann et al., 1999, Holmqvist et al., 2003, Barkman et al., 1999). Figure 6 shows how the steady-state PROFILE model was configured (Sverdrup and Warfvinge 1988a,b, 1992, 1993, Sverdrup and Alveteg 1998). In the dynamic integrated terrestrial ecosystem assessment model ForSAFE-VEG, the system evolution takes account of interactions with a living biosphere, organic matter turnover and ion exchange. Further details of these models can be

found in the literature (Sverdrup et al., 1987, 1995, 1996a,b, 1998, 2007, 2014, 2016, 2017, 2019, Wallman et al., 2002, 2003, Zancchi et al., 2014, 2016a,b, Belyazid et al., 2017, 2018).

To estimate field weathering rates, each reaction  $i$  for every mineral  $j$  is corrected for the field site temperature and for the partial wetting of the soil (Sverdrup 1990, Sverdrup and Warfvinge 1995, Sverdrup and Alveteg 1998) in accord with:

$$R_W = h(\theta) * \sum_{j=1}^{\text{Minerals}} A_j * \sum_{i=1}^{\text{Dissolution reactions}} (r_i * g_{i,j}(T)) \quad (3)$$

where  $\theta$  stands for the fraction of the soil mineral surfaces wetted,  $A_j$  designates the surface area of the mineral  $j$ ,  $h(\theta)$  refers to a wetting function for the mineral material and  $T$  signifies the soil temperature in centigrade.  $g_{i,j}(T)$  corresponds to the temperature adjustment function for reaction  $i$  of mineral  $j$ .  $r_i$  denotes the reaction rate of dissolution reaction  $i$ . This adjustment is based on the Arrhenius equation and takes account of the difference in rates between the temperature of the field site and that of the parameter database, which was set at 8°C (Sverdrup 1990). Figure 9 shows the reaction causal loop diagram for silicate minerals in the soil (Sverdrup 1990, Sverdrup and Warfvinge 1995). This diagram shows how the mineral weathering process communicates with other biogeochemical processes in a terrestrial ecosystem. The causal loop diagram is a graphical display of the differential balances in the system. Together with the flow charts, they define the system. The process has several intermediate equilibrium steps, but pass an irreversible dissolution threshold (Figure 10) The irreversible step makes the whole process irreversible. The reaction products exert a negative effect on the amount of activated complex that can decay, thus they retard the dissolution reaction. But once the activated complex has formed, it has a constant decay rate, set by quantum mechanics (Sverdrup 1990, Sverdrup and Warfvinge 1995). The full derivation of the rate equations, starting from the elementary chemical reactions and the decay of the surface complexes in transitional state has been reviewed by (Sverdrup 1990, Sverdrup and Warfvinge 1995).

#### 4.4 Mineral reaction kinetics

As stated above five reactions are assumed to contribute to the total chemical weathering rate of a silicate mineral in soils (Sverdrup 1990, 2009, Sverdrup and Warfvinge 1995):

1. The reaction between the mineral surface and the aqueous hydrogen ion
2. The reaction between the mineral surface and the water molecule
3. The reaction between the mineral surface and aqueous carbon dioxide
4. The reaction between the mineral surface and aqueous organic acid ligands
5. The reaction between the mineral surface and the aqueous hydroxy ion

Reactions 1-4 in the list above were included in earlier versions of the PROFILE and ForSAFE models (Sverdrup 1990, Sverdrup and Warfvinge 1995). This original model has been enlarged to include reaction 5.

The reaction of the mineral surface with the aqueous  $H^+$  ion, reaction 1, is considered part of the reaction with the  $H^+$  reaction regardless of the source of  $H^+$  (Figures 8 and 10). Both  $CO_2$  and organic acids can change the fluid pH, and this is accounted for in the  $H^+$  reaction. Figure 8 shows the reaction pathway through the  $H^+$  reaction, adapted after Sverdrup (1990). Some of the reaction products form secondary minerals. Amorphous phases may also precipitate from solution. These can slowly recrystallize to secondary minerals. This has been generalized in Figure 9.

Reaction number 4 between organic acid ligands and the mineral surface contains at least two distinct contributions: one from fast and one from slower reacting organic acid ligands (Sverdrup 1990). We have simplified this to one generic rate equation that could be parameterized for some minerals (feldspar, olivine, pyroxenes, hornblende, apatite; Sverdrup et al., 1990, later literature has extended the list somewhat). The importance of organic acids for weathering has been frequently over estimated in the literature, and several claims of strong effects of organic acids have been made (For a review see Smits and Wallander 2016, Smits et al., 2014, Sverdrup 1990, 2009 but also Keegan and

Laskow-Lehey 2014 on why these claims have been so persistent). The highest concentration of organic acids occur in the upper soil layers, where the mineral content is lower. As the mineral contents increase with depth, the concentrations of organic acids reach low levels with only marginal effect on the overall weathering rate (Sverdrup 2009).

Organic acids in soils are mostly sourced from soil organic matter decomposition. Trees, soil fungi and mycorrhiza do not have the ability to increase the weathering rate significantly (See Sverdrup 1990, 2009, Sverdrup and Warfvinge 1992, Warfvinge and Sverdrup 1993 for details, kinetic expressions and data underpinning this, see Smits and Wallander 2016 and Smits et al., 2014 on the subject concerning apatite). Trees and vegetation can indirectly affect weathering rates when they take up Ca, Mg, K as nutrients, and thereby removing weathering rate products that can slow mineral dissolution. Decomposition of plant debris and soil organic matter produce organic acids that may react with the minerals. This effect is passive, and does not occur not by design of the plants (See Smits and Wallander 2016 and Smits et al., 2014 for measurements, Keegan and Laskow-Lehey 2014 for some social aspects and Sverdrup 2009 for a further analysis from a systemic perspective).

Fluorides form soluble complexes in water with aluminium and silicates. The reaction of the mineral surface with fluoride anions forms a strong reactions, but this occurs very rarely as the fluoride concentrations are very low. The fluoride reaction has been ignored for most soils in natural terrestrial ecosystems, as this would cause an unnecessary complication of the aluminium and silicate chemistry.

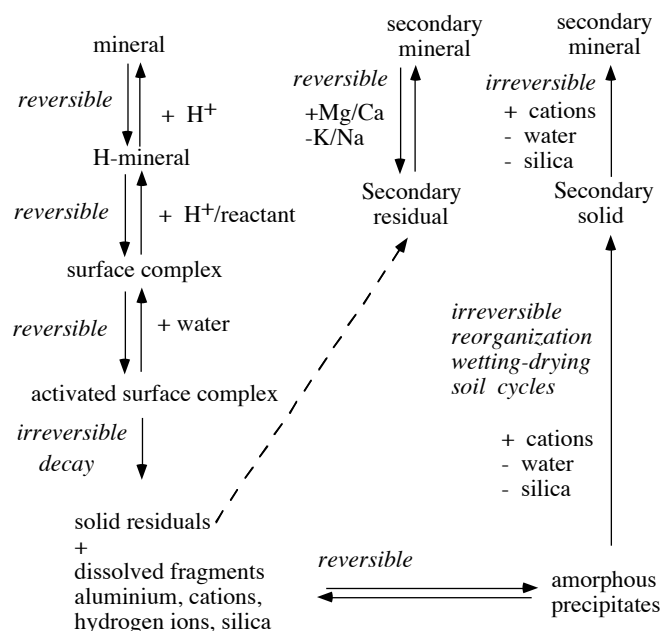

Figure 8. The reaction pathway through the  $H^+$  reaction passes over several reversible steps that change the surface sites and create an unstable surface complex; the Transition State Surface Complex that will decay irreversibly. Note that the process is irreversible, and thus cannot go backwards. The mineral may dissolve completely, be altered to a secondary mineral or form precipitates that slowly recrystallize to secondary solid phases.

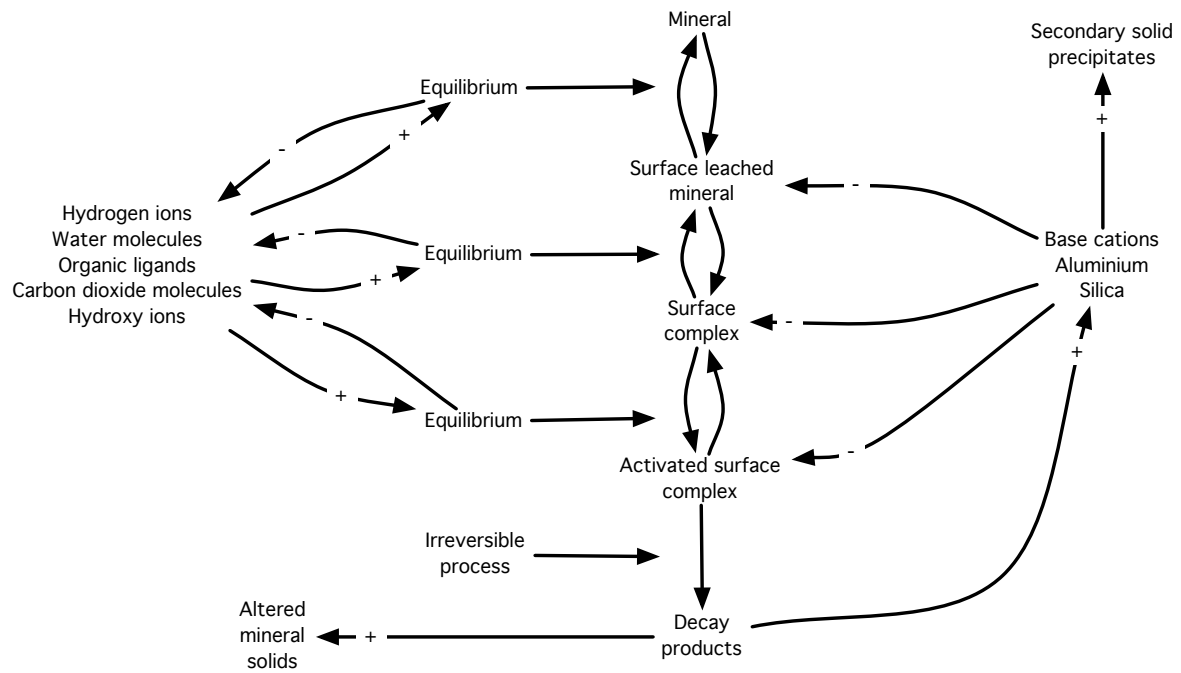

Figure 9. Reaction pathway for silicate minerals in soils according to Transition State Theory as implemented by the authors (See Sverdrup 1990, Sverdrup and Warfvinge 1995 for a full explanation).

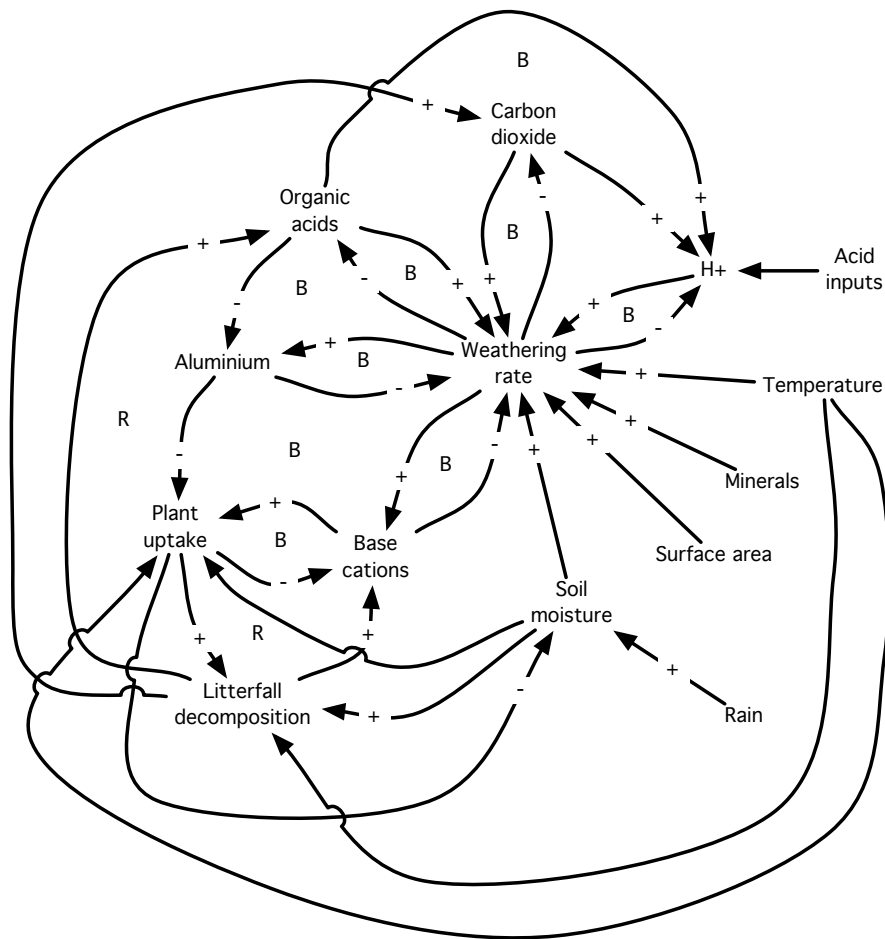

Figure 10. The partial causal loop diagram for the weathering of a soil. See Sverdrup et al., 2018 for a full explanation of causal loop diagrams and their use in modelling.

The dissolution rate per surface area of a mineral considering the first of the four above reactions is thus consistent with (Sverdrup and Warfvinge 1988, 1992):

$$r_{\text{Total}} = r_{\text{H}^+} + r_{\text{H}_2\text{O}} + r_{\text{CO}_2} + r_{\text{R}} \quad (4)$$

The mineral dissolution kinetic equation for the 4 individual reactions applied in the original PROFILE model was the simplified version of the full kinetic expression based on the Transition State Theory applied to silicate chemical weathering (see Sverdrup 1990, Sverdrup and Warfvinge 1995):

$$r = k_{\text{H}} * \frac{[\text{H}^+]^{n_{\text{H}}}}{f_{\text{H}}} + \frac{k_{\text{H}_2\text{O}}}{f_{\text{H}_2\text{O}}} + k_{\text{CO}_2} * P_{\text{CO}_2}^{n_{\text{CO}_2}} * \frac{1}{f_{\text{CO}_2}} + k_{\text{R}} * \frac{[\text{R}]^{n_{\text{R}}}}{1 + K_{\text{Org}} * [\text{R}]^{n_{\text{R}}}} * \frac{1}{f_{\text{R}}} \quad (5)$$

where the different n designate reaction orders. The different  $k_{\text{H}}$ ,  $k_{\text{H}_2\text{O}}$ ,  $k_{\text{CO}_2}$ ,  $k_{\text{R}}$  stand for rate coefficients. Constituents within brackets [c] are concentrations, and R refers to organic ligands. The different  $f_{\text{H}^+}$ ,  $f_{\text{H}_2\text{O}}$ ,  $f_{\text{CO}_2}$ ,  $f_{\text{R}}$ ,  $f_{\text{OH}}$  signify retarding or ‘break’ functions defined by (Sverdrup 1990, Sverdrup and Warfvinge 1992, Warfvinge and Sverdrup 1993, Sverdrup and Warfvinge 1995):

$$f_{\text{H}^+} = \left(1 + \frac{[\text{BC}]}{C_{\text{BC,H}}}\right)^{x_{\text{H}}} * \left(1 + \frac{[\text{Al}^{3+}]}{C_{\text{Al,H}}}\right)^{y_{\text{H}}} \quad (6)$$

$$f_{\text{H}_2\text{O}} = \left(1 + \frac{[\text{BC}]}{C_{\text{BC,H}_2\text{O}}}\right)^{x_{\text{H}_2\text{O}}} * \left(1 + \frac{[\text{Al}^{3+}]}{C_{\text{Al,H}_2\text{O}}}\right)^{y_{\text{H}_2\text{O}}} \quad (7)$$

$$f_{\text{CO}_2} = \left(1 + \frac{[\text{BC}]}{C_{\text{BC,CO}_2}}\right)^{x_{\text{CO}_2}} * \left(1 + \frac{[\text{Al}^{3+}]}{C_{\text{Al,CO}_2}}\right)^{y_{\text{CO}_2}} \quad (8)$$

$$f_{\text{R}} = \left(1 + \frac{[\text{BC}]}{C_{\text{BC,R}}}\right)^{x_{\text{R}}} * \left(1 + \frac{[\text{Al}^{3+}]}{C_{\text{Al,R}}}\right)^{y_{\text{R}}} \quad (9)$$

$$f_{\text{OH}^-} = \left(1 + \frac{[\text{BC}]}{C_{\text{BC,OH}}}\right)^{x_{\text{OH}}} * \left(1 + \frac{[\text{Al}^{3+}]}{C_{\text{Al,OH}}}\right)^{y_{\text{OH}}} \quad (10)$$

Note that the retardation or ‘breaking’ functions represent molecular mechanisms that slow the reaction by forming fewer active surface complexes (Sverdrup 1990, Sverdrup and Warfvinge 1995).  $\text{Al}^{3+}$  is the concentration of positively charged aluminium ions in the solution (Sverdrup 1990 – see also section 4.8). The subscript BC,OH represents a term related to base cations (BC) in the  $\text{OH}^-$  reaction, Note this slowing of the rates with increasing fluid concentration is not due to the approach to a mineral-water equilibrium state. The dissolution of many primary silicate minerals is not reversible under normal soil conditions as the fluids do not attain close to equilibrium conditions. The dissolution of most primary minerals is irreversible under normal soil conditions, and thus there is no equilibrium between the mineral surface and the soil solutions. Instead, there will be a steady state between the reaction at the surface and the removal of ions by solute transport and precipitation into secondary phases. This may look like an equilibrium, but does not behave like one. A few minerals are exceptions such as calcite, a few other carbonates, hydroxides and quartz. Even with these the attainment of equilibrium is kinetically limited. For calcite in soils we have observed this to take several days or weeks (Warfvinge et al., 1987). All other minerals (feldspars, pyroxenes, amphiboles, etc..) do not precipitate from solution, some amorphous aluminosilicate clay precursors only precipitate very slowly.

#### 4.5. The updated kinetics equation

The original 4 mineral dissolution reactions have been enlarged to include  $\text{OH}^-$ -reaction in the present study. The complete equation is consistent with



$$r_{\text{Total}} = r_{\text{H}^+} + r_{\text{H}_2\text{O}} + r_{\text{CO}_2} + r_{\text{R}^+} + r_{\text{OH}^-} \quad (11)$$

The full kinetic equation for all 5 reactions is (Sverdrup 1990, Sverdrup and Warfvinge 1995):

$$r = k_{\text{H}} * \frac{[\text{H}^+]^{n_{\text{H}}}}{f_{\text{H}}} + \frac{k_{\text{H}_2\text{O}}}{f_{\text{H}_2\text{O}}} + k_{\text{CO}_2} * \frac{P_{\text{CO}_2}^{n_{\text{CO}_2}}}{1 + K_{\text{CO}_2} * P_{\text{CO}_2}^{n_{\text{CO}_2}}} * \frac{1}{f_{\text{CO}_2}} + k_{\text{R}} * \frac{[\text{R}]^{n_{\text{R}}}}{1 + K_{\text{Org}} * [\text{R}]^{n_{\text{R}}}} * \frac{1}{f_{\text{R}}} + k_{\text{OH}} * \frac{[\text{OH}^-]^{n_{\text{OH}}}}{f_{\text{OH}}} \quad (12)$$

For most minerals, the strongest effect on the break functions is that of aluminium at  $\text{pH} < 7$ , followed by silica and base cations. At  $\text{pH} > 8$ , the strongest effect is from silica and base cations, and less pronounced for aluminium (Sverdrup 1990). Before applying Equation (12) a number of new adaptations have been carried out as described below.

#### 4.6. Retardation of mineral dissolution rates by organic ligands

The original formula for the slowing of mineral dissolution rates with increasing organic ligand concentration was (Sverdrup 1990, Sverdrup and Warfvinge 1995):

$$r_{\text{Org}} = k_{\text{R}} * \frac{[\text{R}]^{n_{\text{R}}}}{1 + [\text{R}]^{n_{\text{R}}}} * \frac{1}{f_{\text{R}}} \quad (13)$$

this has been reformulated to:

$$r_{\text{Org}} = k_{\text{R}} * \left( \frac{[\text{R}]}{1 + [\text{R}]} \right)^{n_{\text{R}}} * \frac{1}{f_{\text{R}}} \quad (14)$$

The difference in these equations is that the latter contains one additional parameter  $[\text{R}]_{\text{Limit}}$  in  $f_{\text{R}}$  that has the effect to set a lower concentration, below which the organic acids have no effect. This equation has been parameterized and used in the final expression provided below. This limit was incorporated into the organic acid ligand retardation function  $f_{\text{R}}$  (Smits and Wallander 2016, Smits et al., 2014, Sverdrup 1990, 2009).

#### 4.7. Retardation of mineral dissolution rates by aqueous $\text{CO}_2$

The main effect of the presence of  $\text{CO}_2$  on mineral dissolution rates is to change the pH of the solution. This effect is accounted for by the chemical solution equilibria, and dealt with in the  $\text{H}^+$  reaction. The dedicated  $\text{CO}_2$  term takes into account the effect of a reaction between the  $\text{CO}_2$  and the mineral surface. The effect of the presence of aqueous organic species decreases at higher concentrations of organic acids as the surface sites have become saturated with organic acid ligands. We hypothesize that  $\text{CO}_2$  exhibits the same behaviour. Some data show that  $\text{CO}_2$  also reacts with mineral surface sites as some type of carbonate ligand (a bicarbonate coordinated towards a cation in the lattice) adsorbed to the surface, setting up a transitional surface complex may decay. The mechanism by which  $\text{CO}_2$  effects silicate dissolution rates appears to follow the sequence (Sverdrup 1990, Sverdrup and Warfvinge 1995, Brady and Carrol 1994, Golubev et al., 2005, Navarre-Sitchler and Thyne 2007, Berg and Banwart 2000):

1. The  $\text{CO}_2$  molecule attaches to the mineral surface
2. The  $\text{CO}_2$  molecule forms a bicarbonate-water-metal complex with the mineral surface on singly coordinated metal cations. Indications are that it may be the  $\text{CO}_3^{2-}$  ligand that is forming a surface complex.
3. A cation is lifted into the complex (K, Na, Mg, Ca, Fe, etc..)

4. A small fraction of the surface complexes detach from the surface and the mineral dissolves.

Thus there should potentially be an upper concentration limit where additional aqueous CO<sub>2</sub> will have no further effect on mineral dissolution rates. This seems to occur between 10 and 50 atmospheres of CO<sub>2</sub> partial pressure for mica and chlorites (Drever et al., 1996, Mast and Drever 1987, Hausrath et al., 2009). Observations on some other minerals indicate of a similar behaviour, but this limit remains elusive in terms of parameterization due to lack of data. In addition the dissolution rates of some minerals exhibit no detectable effect of the presence of aqueous CO<sub>2</sub>, and some are only slightly inhibited by this species. Lagache (1965, 1976), Busenberg and Clemency (1976), Berg and Banwart (2000) and Golubev et al., (2005) reported experiments performed at different CO<sub>2</sub> partial pressures between 0 and 26.3 CO<sub>2</sub> atmospheres and temperatures between 0 °C and 200 °C. The original equation used by Sverdrup (1990) and Sverdrup and Warfvinge (1995) to describe these data was

$$r_{\text{CO}_2} = k_{\text{CO}_2} * \frac{P_{\text{CO}_2}^{n_{\text{CO}_2}}}{1 + K_{\text{CO}_2} * P_{\text{CO}_2}^{n_{\text{CO}_2}}} * \frac{1}{f_{\text{CO}_2}} \quad (15)$$

In this study we use a variation of this equation of the form:

$$r_{\text{CO}_2} = k_{\text{CO}_2} * \left( \frac{P_{\text{CO}_2}}{1 + K_{\text{CO}_2} * P_{\text{CO}_2}} \right)^{n_{\text{CO}_2}} * \frac{1}{f_{\text{CO}_2}} \quad (16)$$

Evidence suggests that the value of  $P_{\text{Limit CO}_2}$  is in the range of 5 to 10 atmospheres and  $K_{\text{CO}_2}=0.05$  and  $n_{\text{CO}_2}=0.6$  for albite (Sverdrup 1990). Navarre-Sitchler and Thyne (2007) suggest  $n_{\text{CO}_2}=0.45$ , which is for practical purposes the same. Berg and Banwart (2000) suggested  $n_{\text{CO}_2}=0.25$  at low pressures of CO<sub>2</sub>. As mentioned above, a similar behaviour was observed for mica, biotite and chlorites. Indications are that something similar takes place on the surface of montmorillonite, diasporite, gibbsite, goethite and lepidocrocite. There almost no experimental data available allowing the retrieval of the parameters in Equation (16) for other minerals. The effect of increasing aqueous CO<sub>2</sub> has been overlooked in most experimental studies.

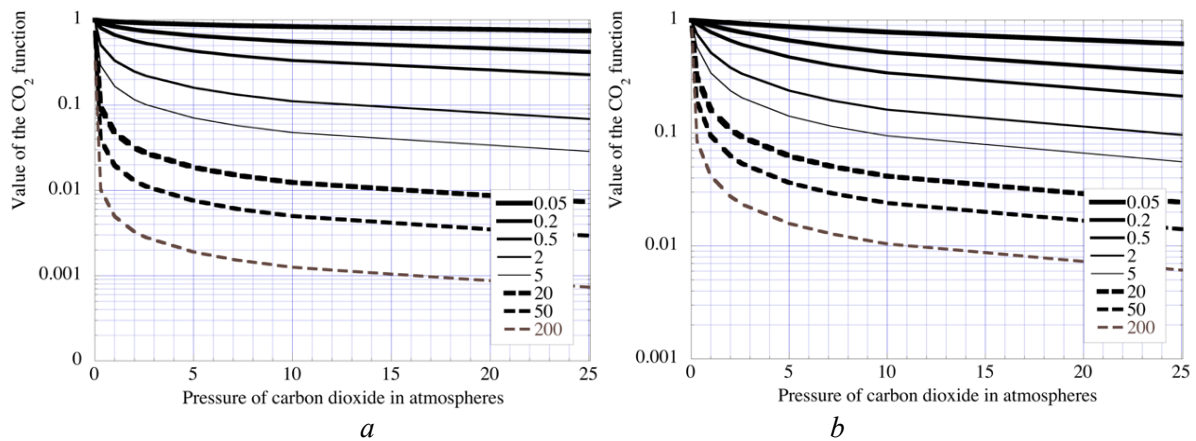

Figure 11. The calculated effect of aqueous carbon dioxide on mineral dissolution reactions using Equation 15 in (a) and Equation 16 in (b). See Table 2 for values for different minerals.

| Table 1. Selection table for parameterization of the parameter $z$ in the silica brake function describing the dissolution rates of various silicate minerals (see equations 24-28). |                             |                                                |                  |                 |               |                 |
|--------------------------------------------------------------------------------------------------------------------------------------------------------------------------------------|-----------------------------|------------------------------------------------|------------------|-----------------|---------------|-----------------|
| #                                                                                                                                                                                    | Silica brake response group | $z$ -values suggested by the mineral reactions |                  |                 |               |                 |
|                                                                                                                                                                                      |                             | H <sup>+</sup>                                 | H <sub>2</sub> O | CO <sub>2</sub> | Organic acids | OH <sup>-</sup> |
| 1                                                                                                                                                                                    | K-Feldspar and sericite     | 6                                              | 2                | 2               | 2             | 1               |
|                                                                                                                                                                                      | Muscovite group and illites | 7                                              | 3                | 3               | 3             | 2               |

|   |                        |     |     |     |     |     |
|---|------------------------|-----|-----|-----|-----|-----|
| 2 | Albite                 | 8   | 4   | 4   | 4   | 3   |
|   | Na-rich Plagioclase    | 7   | 4   | 4   | 4   | 3   |
|   | Ca-rich Plagioclase    | 10  | 6   | 6   | 6   | 4   |
| 3 | Biotite group          | 16  | 6   | 6   | 6   | 4   |
|   | Chlorite group         |     |     |     |     |     |
|   | Serpentine             |     |     |     |     |     |
|   | Aluminum-nesosilicates |     |     |     |     |     |
|   | Aluminium pyroxenes    |     |     |     |     |     |
|   | Tourmaline group       |     |     |     |     |     |
| 4 | Amphibole group        | 20  | 16  | 16  | 16  | 8   |
|   | Pyroxene group         | 32  |     |     |     |     |
|   | Epidote group          | 32  |     |     |     |     |
|   | Nesosilicate           | 32  |     |     |     |     |
| 5 | All other silicates    | 32  | 16  | 16  | 16  | 8   |
| 6 | Carbonates             | n.a | n.a | n.a | n.a | n.a |

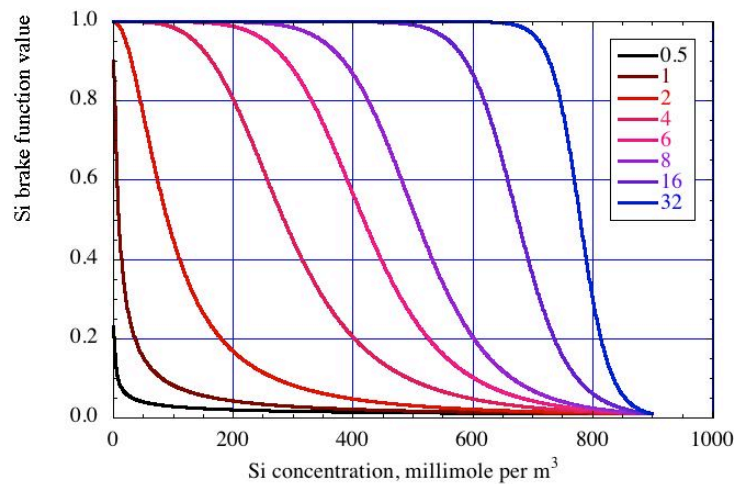

Figure 12. Calculated effect of dissolved Si on silicate dissolution rates generated using Equation (17) together with  $K_{Si}=100$ , and the saturation concentration,  $C_{Si}=900$  mmol per  $m^3$  and the coefficients in listed in Table 1.

Values calculated of the effect of aqueous  $CO_2$  on silicate dissolution rates are illustrated in Figure 11. These calculations suggests that there is a significant saturation of the surface with  $CO_2$  at approximately 5 to 10 atmospheres partial pressure of  $CO_2$ . Data regression suggests that  $K_{CO_2}$  has a value in the range of 2-20. See Table 1 for the values suggested for different minerals. Note that the values of this parameter are based on minimal supporting experimental data - the available experimental data are few and somewhat incomplete (See Golubev et al., 2005 for a limited but useful assessment). Overall, the effect of  $CO_2$  at normal soil conditions is limited. Nevertheless, these results provide a range for model parameter adjustment. The effect of dissolved  $CO_2$  on rates may become significant for deep aquifers, subsurface  $CO_2$  storage and in industrial high-pressure situations (Sverdrup 1990).

#### 4.8 The silica retarding or 'break' function

An illustrative plot of the effect of aqueous silica on silicate mineral dissolution rates is provided in Figure 12. The equation proposed at the 2016 Ystad Workshop to describe the retardation effect of dissolved Si on mineral dissolution rates was:

$$\frac{1}{f_{Si}} = \frac{1}{1 + K_{Si,i} * \left(\frac{[Si]}{C_{Si}}\right)^{z_{Si}}} \quad (17)$$

The value for the silica brake coefficient  $K_{Si,i}=100$  was chosen, and causes a gradual reduction in the dissolution rate of minerals down to a minimum of approximately 0.9% of the rate unaffected by silica at very high silica concentrations (see Table 1). Figure 12 shows values of the silica brake function calculated using Equation 17, using the surface constant value,  $K_{Si}=100$ , and the saturation concentration  $C_{Si}=900$  mmol per  $m^3$  in Equation 17 together with the coefficients in Table 3. Exponents from  $z_{Si}=0.5$  to 32 in Equation (17) of the silica rate brake are shown in Figure 12.

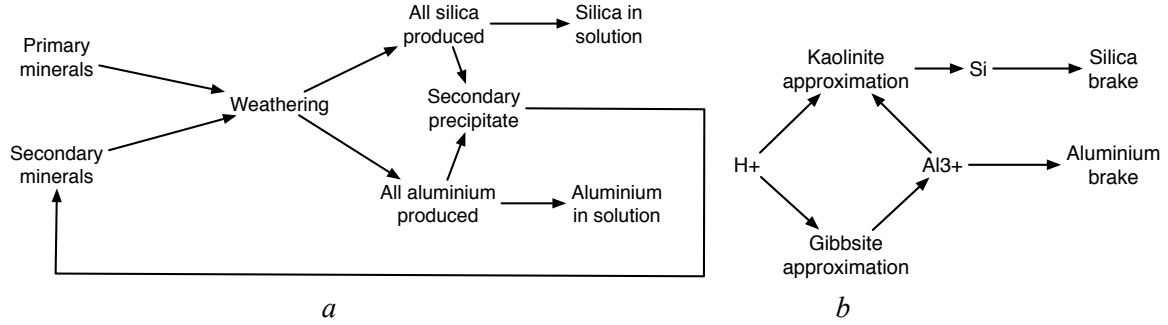

Figure 13. a) Plot illustrating the fate of silica during the mineral dissolution process. b) Diagram showing how the aluminium and silica concentrations are estimated in the model. The  $H^+$  concentration is used with the equation called the “Gibbsite” equation (Eq. 19) to estimate the  $Al^{3+}$  concentration in the soil solution. These  $H^+$  and  $Al^{3+}$  concentrations are used in Equation 21 to estimate the silica concentration that is used to quantify the silica ‘brake’ on the mineral weathering reactions.

Figure 13a shows a plot illustrating the fate of silica in the dissolution process. Only a small part of the aqueous aluminium and aqueous silica produced by the dissolution of minerals remain in solution. Most precipitates out as secondary phases. Figure 13b shows how the aluminium and silica concentrations are estimated in the model. We assume that aluminium precipitates out from the solution, controlled by something that appears to be gibbsite-like; it is likely something amorphous of unknown composition, see Alveteg et al. (1995). The “Gibbsite” reaction is:

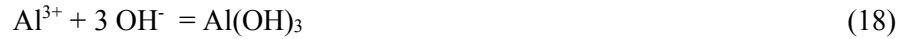

Leading to the “Gibbsite” expression:

$$[Al^{3+}] = K_G * [H^+]^Y \quad (19)$$

where the exponent Y has a value of 2.4-3.  $K_G$  is the Gibbsite coefficient and defined in the critical loads mapping manual (Sverdrup et al., 1990). An expression analogous to the Gibbsite approximation is used to calculate the Si concentration (Equation 22b, below). We assume that the Si will be present as  $H_4Si(OH)_4$  in the fluid phase, not upsetting any charge balance constraints. We assume that silica precipitates out, controlled by what that appears to be kaolinite. As such, there is a similar expression can be used for approximating the silica concentration:

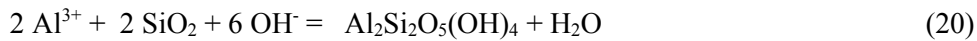

which gives the apparent equilibrium expressions:

$$[Al^{3+}]^2 * [OH^-]^6 * [SiO_2]^2 = K_{Kaolinite} \quad (21)$$

And this can be re-arranged to:

$$[SiO_2]^2 = K_{Kaolinite}^2 * \frac{[H^+]^6}{[Al^{3+}]^2} \quad (22a)$$

which leads to the “kaolinite” expression:

$$[\text{SiO}_2] = K_{\text{Kaolinite}} * \frac{[\text{H}^+]^3}{[\text{Al}^{3+}]} \quad (22b)$$

where  $K_{\text{Kaolinite}}$  is the equilibrium coefficient being used. Note that the “equilibrium” equations assumed above, are not true equilibrium, and that kaolinite and gibbsite minerals dissolve very slowly under normal conditions. Both the “gibbsite” and “kaolinite” mentioned above are crude simplifications, possibly representing an amorphous precipitate combined with precipitation kinetics and ion exchange in the SkogSAFE model (The long term variant with variable mineralogy and surface areas, and that runs for 15,000 years in one simulation, see Alveteg et al., 1995, Rietz 1995, Warfvinge et al., 1996 for more information). These equations have been applied in the revised ForSAFE-2D model.

#### 4.9. The full kinetic expression

The equations and approximations summarized above leads to the full revised mineral dissolution rate equations given by

$$r = k_H * \frac{[\text{H}^+]^{n_H}}{f_H} + \frac{k_{\text{H}_2\text{O}}}{f_{\text{H}_2\text{O}}} + k_{\text{CO}_2} * P_{\text{CO}_2}^{n_{\text{CO}_2}} * \frac{1}{f_{\text{CO}_2}} + k_R * [\text{R}]^{n_R} * \frac{1}{f_R} + k_{\text{OH}} * \frac{[\text{OH}^-]^{n_{\text{OH}}}}{f_{\text{OH}}} \quad (23)$$

where the retarding or ‘break’ functions are given by:

$$f_{\text{H}^+} = \left(1 + \frac{[\text{BC}]}{C_{\text{BC,H}}}\right)^{x_H} * \left(1 + \frac{[\text{Al}^{3+}]}{C_{\text{Al,H}}}\right)^{y_H} * \left(1 + K_{\text{Si,H}} * \left(\frac{[\text{Si}]}{C_{\text{Si,H}^+}}\right)^{z_H}\right) \quad (24)$$

$$f_{\text{H}_2\text{O}} = \left(1 + \frac{[\text{BC}]}{C_{\text{BC,H}_2\text{O}}}\right)^{x_{\text{H}_2\text{O}}} * \left(1 + \frac{[\text{Al}^{3+}]}{C_{\text{Al,H}_2\text{O}}}\right)^{y_{\text{H}_2\text{O}}} * \left(1 + K_{\text{Si,H}_2\text{O}} * \left(\frac{[\text{Si}]}{C_{\text{Si,H}_2\text{O}}}\right)^{z_{\text{H}_2\text{O}}}\right) \quad (25)$$

$$f_{\text{CO}_2} = \left(1 + K_{\text{CO}_2} * \frac{P_{\text{CO}_2}}{P_{\text{CO}_2\text{Limit}}}\right)^{n_{\text{CO}_2}} * \left(1 + \frac{[\text{BC}]}{C_{\text{BC,CO}_2}}\right)^{x_{\text{CO}_2}} * \left(1 + \frac{[\text{Al}^{3+}]}{C_{\text{Al,CO}_2}}\right)^{y_{\text{CO}_2}} * \left(1 + K_{\text{Si,CO}_2} * \left(\frac{[\text{Si}]}{C_{\text{Si,CO}_2}}\right)^{z_{\text{CO}_2}}\right) \quad (26)$$

$$f_R = \left(1 + \frac{[\text{R}]}{[\text{R}]_{\text{Limit}}}\right)^{n_R} * \left(1 + \frac{[\text{BC}]}{C_{\text{BC,R}}}\right)^{x_R} * \left(1 + \frac{[\text{Al}^{3+}]}{C_{\text{Al,R}}}\right)^{y_R} * \left(1 + K_{\text{Si,R}} * \left(\frac{[\text{Si}]}{C_{\text{Si,R}}}\right)^{z_R}\right) \quad (27)$$

$$f_{\text{OH}^-} = \left(1 + \frac{[\text{BC}]}{C_{\text{BC,OH}}}\right)^{x_{\text{OH}}} * \left(1 + \frac{[\text{Al}^{3+}]}{C_{\text{Al,OH}}}\right)^{y_{\text{OH}}} * \left(1 + K_{\text{Si,OH}} * \left(\frac{[\text{Si}]}{C_{\text{Si,OH}^-}}\right)^{z_{\text{OH}}}\right) \quad (28)$$

where:

$C_{\text{BC},i}$  is the lower limiting base cation concentration in reaction i,

$C_{\text{Al},i}$  is the lower limiting aluminium concentration in reaction i,

$C_{\text{Si},i}$  is the lower limiting silica concentration in reaction i,

$P_{\text{CO}_2\text{limit}}$  is the lower limiting carbon dioxide partial pressure in reaction i,

$[\text{R}]_{\text{limit}}$  is the lower limiting organic acid concentration in reaction i as concentration of DOC,

$x_i$  is the base cation brake reaction order for i,

$y_i$  is the aluminium brake reaction order for i

$z_i$  is the silica brake reaction order of i.

$K_{\text{CO}_2}$  is the  $\text{CO}_2$  brake coefficient and set to 20.

$K_{Si,i}$  is the silica brake constant for reaction  $i$ , set to 100.

*Table 2. Alteration series from muscovite, biotite and feldspars to clays, corresponding to Figure 14.*

| #                 | Mineral                        | Interlayer                                                                   | Octahedral                                                                  | Tetrahedral                                                             |
|-------------------|--------------------------------|------------------------------------------------------------------------------|-----------------------------------------------------------------------------|-------------------------------------------------------------------------|
| Muscovite pathway |                                |                                                                              |                                                                             |                                                                         |
| 1                 | Muscovite                      | K                                                                            | Al <sub>2</sub>                                                             | Al <sub>1.0</sub> Si <sub>3.0</sub> O <sub>10</sub> (OH) <sub>2</sub>   |
| 2                 | Illite 1                       | K <sub>0.5</sub> Mg <sub>0.01</sub> Ca <sub>0.01</sub> Al <sub>0.05</sub>    | Al <sub>1.6</sub> Fe <sub>0.25</sub> Mg <sub>0.1</sub> Ti <sub>0.04</sub>   | Al <sub>0.6</sub> Si <sub>3.4</sub> O <sub>10</sub> (OH) <sub>2</sub>   |
| 3                 | Illite 2                       | K <sub>0.44</sub> Mg <sub>0.01</sub> Ca <sub>0.01</sub> Al <sub>0.07</sub>   | Al <sub>1.6</sub> Fe <sub>0.25</sub> Mg <sub>0.1</sub> Ti <sub>0.04</sub>   | Al <sub>0.6</sub> Si <sub>3.4</sub> O <sub>10</sub> (OH) <sub>2</sub>   |
| 4                 | Illite 3                       | K <sub>0.39</sub> Mg <sub>0.013</sub> Ca <sub>0.013</sub> Al <sub>0.06</sub> | Al <sub>1.5</sub> Fe <sub>0.32</sub> Mg <sub>0.1</sub> Ti <sub>0.08</sub>   | Al <sub>0.6</sub> Si <sub>3.4</sub> O <sub>10</sub> (OH) <sub>2</sub>   |
| 5                 | Illitic vermiculite            | K <sub>0.35</sub> Mg <sub>0.03</sub> Ca <sub>0.03</sub> Al <sub>0.06</sub>   | Al <sub>1.63</sub> Fe <sub>0.32</sub> Mg <sub>0.08</sub> Ti <sub>0.07</sub> | Al <sub>0.6</sub> Si <sub>3.4</sub> O <sub>10</sub> (OH) <sub>2</sub>   |
| 6                 | Kaolinite                      |                                                                              |                                                                             | Al <sub>2.0</sub> Si <sub>2</sub> O <sub>5</sub> (OH) <sub>4</sub>      |
| Chlorite pathway  |                                |                                                                              |                                                                             |                                                                         |
| 1                 | Chlorite                       | Ca <sub>0.5</sub> Mg <sub>1.5</sub>                                          | Al <sub>1.0</sub> Fe <sub>0.5</sub> Mg <sub>1.5</sub>                       | Al <sub>1.0</sub> Si <sub>3.0</sub> O <sub>10</sub> (OH) <sub>2</sub>   |
| 2                 | Vermiculite 1                  | K <sub>0.32</sub> Mg <sub>0.07</sub> Ca <sub>0.09</sub> Al <sub>0.05</sub>   | Al <sub>1.52</sub> Fe <sub>0.35</sub> Mg <sub>0.1</sub>                     | Al <sub>0.6</sub> Si <sub>3.4</sub> O <sub>10</sub> (OH) <sub>2</sub>   |
| 3                 | Vermiculite 2                  | K <sub>0.30</sub> Mg <sub>0.05</sub> Ca <sub>0.05</sub> Al <sub>0.05</sub>   | Al <sub>1.55</sub> Fe <sub>0.32</sub> Mg <sub>0.05</sub> Ti <sub>0.06</sub> | Al <sub>0.6</sub> Si <sub>3.4</sub> O <sub>10</sub> (OH) <sub>2</sub>   |
| 4                 | Vermiculite 3                  | K <sub>0.25</sub> Mg <sub>0.04</sub> Ca <sub>0.04</sub> Al <sub>0.08</sub>   | Al <sub>1.55</sub> Fe <sub>0.32</sub> Mg <sub>0.05</sub> Ti <sub>0.06</sub> | Al <sub>0.6</sub> Si <sub>3.4</sub> O <sub>10</sub> (OH) <sub>2</sub>   |
| 5                 | Al/OH interlayered vermiculite | K <sub>0.11</sub> Mg <sub>0.04</sub> Ca <sub>0.04</sub> Al <sub>0.1</sub>    | Al <sub>1.52</sub> Fe <sub>0.4</sub> Mg <sub>0.05</sub> Ti <sub>0.08</sub>  | Al <sub>0.5</sub> Si <sub>3.5</sub> O <sub>10</sub> (OH) <sub>2</sub>   |
| 6                 | Kaolinite                      |                                                                              |                                                                             | Al <sub>2.0</sub> Si <sub>2</sub> O <sub>5</sub> (OH) <sub>4</sub>      |
| Biotite pathway   |                                |                                                                              |                                                                             |                                                                         |
| 1                 | Biotite                        | K <sub>1.0</sub> Mg <sub>2.0</sub>                                           | Al <sub>0.5</sub> Fe <sub>0.5</sub> Mg <sub>1.0</sub>                       | Al <sub>1.0</sub> Si <sub>3.0</sub> O <sub>10</sub> (OH) <sub>2</sub>   |
| 2                 | Vermiculite 1                  | K <sub>0.32</sub> Mg <sub>0.07</sub> Ca <sub>0.09</sub> Al <sub>0.05</sub>   | Al <sub>1.52</sub> Fe <sub>0.35</sub> Mg <sub>0.1</sub>                     | Al <sub>0.6</sub> Si <sub>3.4</sub> O <sub>10</sub> (OH) <sub>2</sub>   |
| 3                 | Vermiculite 2                  | K <sub>0.30</sub> Mg <sub>0.05</sub> Ca <sub>0.05</sub> Al <sub>0.05</sub>   | Al <sub>1.55</sub> Fe <sub>0.32</sub> Mg <sub>0.05</sub> Ti <sub>0.06</sub> | Al <sub>0.6</sub> Si <sub>3.4</sub> O <sub>10</sub> (OH) <sub>2</sub>   |
| 4                 | Vermiculite 3                  | K <sub>0.25</sub> Mg <sub>0.04</sub> Ca <sub>0.04</sub> Al <sub>0.08</sub>   | Al <sub>1.55</sub> Fe <sub>0.32</sub> Mg <sub>0.05</sub> Ti <sub>0.06</sub> | Al <sub>0.6</sub> Si <sub>3.4</sub> O <sub>10</sub> (OH) <sub>2</sub>   |
| 5                 | Al/OH interlayered vermiculite | K <sub>0.1</sub> Mg <sub>0.04</sub> Ca <sub>0.04</sub> Al <sub>0.1</sub>     | Al <sub>1.52</sub> Fe <sub>0.4</sub> Mg <sub>0.05</sub> Ti <sub>0.08</sub>  | Al <sub>0.5</sub> Si <sub>3.5</sub> O <sub>10</sub> (OH) <sub>2</sub>   |
| 6                 | Kaolinite                      |                                                                              |                                                                             | Al <sub>2.0</sub> Si <sub>2</sub> O <sub>5</sub> (OH) <sub>4</sub>      |
| Feldspar pathway  |                                |                                                                              |                                                                             |                                                                         |
| 1                 | Feldspar                       | K, Na, Ca                                                                    |                                                                             | Al <sub>1</sub> Si <sub>3</sub> O <sub>8</sub>                          |
| 2                 | Sericite                       | Na <sub>0.1</sub> K <sub>0.75</sub>                                          | Al <sub>1.9</sub> Mg <sub>0.1</sub>                                         | Al <sub>0.84</sub> Si <sub>3.16</sub> O <sub>10</sub> (OH) <sub>2</sub> |
| 3                 | Sericitic vermiculite 1        | K <sub>0.3</sub> Mg <sub>0.02</sub> Ca <sub>0.05</sub>                       | Al <sub>0.02</sub>                                                          | Al <sub>1.0</sub> Si <sub>3</sub> O <sub>10</sub> (OH) <sub>2</sub>     |
| 4                 | Sericitic vermiculite 2        | K <sub>0.1</sub> Mg <sub>0.05</sub> Ca <sub>0.02</sub>                       | Al <sub>0.05</sub>                                                          | Al <sub>1.0</sub> Si <sub>3</sub> O <sub>10</sub> (OH) <sub>2</sub>     |
| 5                 | Al/OH interlayered vermiculite | K <sub>0.1</sub> Mg <sub>0.04</sub> Ca <sub>0.04</sub> Al <sub>0.1</sub>     | Al <sub>1.52</sub> Fe <sub>0.4</sub> Mg <sub>0.05</sub> Ti <sub>0.08</sub>  | Al <sub>0.5</sub> Si <sub>3.5</sub> O <sub>10</sub> (OH) <sub>2</sub>   |
| 6                 | Kaolinite                      |                                                                              |                                                                             | Al <sub>2.0</sub> Si <sub>2</sub> O <sub>5</sub> (OH) <sub>4</sub>      |

#### 4.9. Secondary phases in the soil

A significant fraction of primary minerals dissolve incongruently to alteration minerals often referred to as secondary minerals and clays. Both terms are inconsistently used in the literature, and thus we define them as follows: We define clay minerals by their composition (kaolinite, gibbsite, quartz) and as listed in Table 3. This approach is thus not based on particle size, but on the molecular crystalline structure. Secondary minerals formed in either two ways; a mineral that has been altered significantly in situ as is described in Table 2, for example when muscovite is altered through a series of illite and vermiculite phases and finally to kaolinite as the end product. Vermiculite, illite, montmorillonite are minerals of variable composition that are often called clays. In the soil, amorphous phases are composed of aluminium, silicate and soil organic substances. These amorphous phases slowly change composition as the organic matter decomposes and a more solid structure emerges. The alteration series from muscovite, biotite and feldspars to clays, are illustrated schematically in Figure 14 and listed in Table 2. The concept behind Table 2 is that as these minerals go through incongruent dissolution (alteration), they become depleted in certain ions (like Ca, Mg, K or Na, and depending on pH, in aluminium (at low pH) or silica (at high pH), but the crystal structure remains constant. Thus the crystal lattice destruction rate remains, but the base cation content of this structure becomes poorer, yielding less cations and less acidity neutralization. We have simplified this process down to 4 pathways, the muscovite pathway, the chlorite pathway, the biotite pathway and the feldspar pathway – see Table 2. Muscovite changes through a series of alteration reactions to illite and finally to kaolinite. Chlorite alters to vermiculites and finally to kaolinite. Biotite goes through a series of alterations to vermiculite and kaolinite. Feldspars go through alterations, K-Feldspars through sericites and plagioclases to vermiculites (Holmqvist 2004, Holmqvist 2002, 2003). This sequence has



been discussed in the SUFOR project and again in the QWARTS workshops and will be later implemented into ForSAFE-2D.

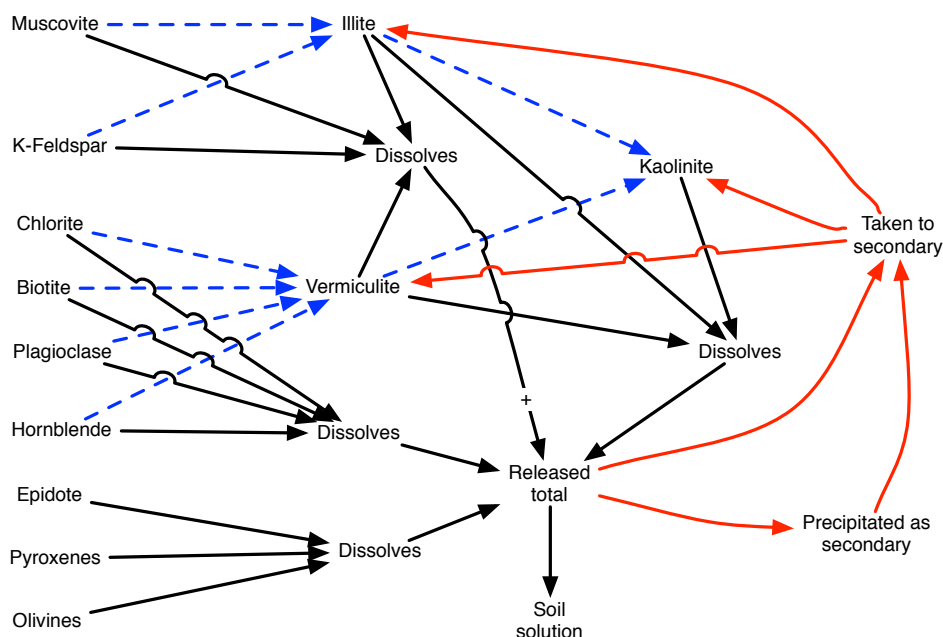

Figure 14. The alteration sequence developed for primary mineral towards alteration minerals, of which some are clay minerals. All minerals that dissolve contribute to the precipitation of secondary minerals.

#### 4.10. The parameterization of the kinetic rate equations

The original PROFILE database had kinetic data for 59 different minerals, and about 25 different carbonates and some artificial silicates. In addition new data from our own experiments (Sverdrup 1998, 1996, Sverdrup and Alveteg 1998, Holmqvist et al., 2002, 2003; Sverdrup and Holmqvist 2004) and from the literature<sup>2</sup> have been considered in this study. Care of these new data

<sup>2</sup>Examples are the following list of articles and studies we have used, but not limited to: Ajemba and Onokwuli 2012, Alekseyev 2007, Alexeyev et al., 1997, Amram and Ganor 2005, Amrhein and Suarez 1992, Anbeek 1992a,b, Anbeek et al., 1994, Aradottir et al., 2013, Bandstra et al., 1998, Beig and Lüttge 2006, Bengtsson and Sjöberg 2009, Berg and Banwart 1994, 2000, Bibi et al., 2010, Bickmore et al., 2006, Blake and Walther 1996, Blum and Stillings 1995, Blum and Lasaga 1988, 1991, Blum 1994, Brady and Walther 1992, Bray et al., 2015, Brandt et al., 2005, Brantley 2003, 2008a,b, Brantley and Stillings 1994, 1996, Brantley and Chen 1995, Brantley and Conrad 2008, Brady and Walther 1992, Braun et al., 2016, Bray 2015, Cama et al., 2000, Carrol and Knauss 2005, Carrol and Walther 1990, Carrol and Smith 2013, Casetou-Gustafsson et al., 2018, Casey et al., 1991, Casey and Sposito 1992, Casey and Westrich 1992, Chaïrat et al., 2007, Chen and Brantley 1997, 1998, 2000, Chin and Mills 1991, Critelli et al., 2015, 2014, Cotton 2008, Crundwell 2013, 2014a,b,c,d, 2015a,b, 2017, Daval et al., 2010a,b, 2013, Devidal et al., 1997, Diedrich et al., 2014, Dixit and Carrol 2007, Dove and Crerar 1990, Dorozhkin 2012, Dresel 1989, Drever et al., 1994, 1996, Drewer and Clow 1995, Drewer and Zobrist 1992, Drever and Stillings 1997, Dorozin 2012, Duckworth and Martins 2003a,b, Fernandez-Bastero et al., 2008, Fischer and Liebscher 2014, Finlay et al., 2010, Fouda et al., 1996a,b, Frogner and Schweda 1998, Fumuto et al., 2001, Gahrke et al., 2005, Ganor et al., 2005, Gautier et al., 1994, Gisslasson and Hans, 1987, Gisslasson and Oelkers 2003, Gisslasson et al., 1996, Godderis et al., 2006, Glover et al., 2003, Godderis et al., 2006, Golubev et al., 2004, 2005, Guidry and Mackenzie 2003, Goyne et al., 2006, Gudbrandsson et al., 2011, 2014, Gustafsson and Puigdomenech 2003, Hamilton et al., 2000, 2001, Hangx and Spiers 2009, Harouiya et al., 2007, Harouiya and Oelkers 2004, Haug et al., 2010, Hausrath et al., 2009, Hayashi and Yamada 1990, Helgeson et al., 1984, Hellmann 2007, 2006, 2010, Hilley et al., 2010, Holmqvist and Sverdrup 2001, Holmqvist et al., 1999, 2002, 2003, 2004, Hodson 2006a,b, Hodson and Langan 1999, Hodson et al., 1996, 1997, Hänchen et al., 2006, Huertas et al., 1999, 2001, Jin et al., 2011, Johnson et al., 1992, Johnson et al., 2014, Jonckbloedt 1998, Jönsson et al., 1995, Kalinowski 1997, Kalinowski and Schweda 1995, Kalinowski et al., 1998, Knauss et al., 1993, Köhler et al., 2003, 2005, Kuwahara 2006a,b, 2008, Labat and Viville 2006, Lagache 1965, Langan et al., 1996, Lartigue 1994, Lasaga 1995, 1998, Lowson et al., 2005, 2007, Lazaro et al., 2015, Lu et al., 2013, 2015, Ludwig et al., 2013, Maher 2010, Malmström and Banwart 1997, Malmström et al., 1996, Maurice et al., 2002, Mazer and Walther 1994, McCourt and Hendershot 1992, Metz et al., 2005, Meyer 2014, Mongeon et al., 2007, Murakami et al., 1998, Murphy and Helgeson 1987, Murphy et al., 1992, 1996, Nagy 1995, Nagy and Lasaga 1992, Nagy et al., 1991, Navarre-Sitchler and Thyne 2007, Nesbitt et al., 1991, Nyström-Claesson and Andersson 1996, Numan and Weaver 1969, Oelkers 2001a,b, Oelkers and Schott 1995a,b, 1998, 2001, Oelkers

sources we have obtained rate parameters for about 90 different silicate or aluminium minerals and 6 generic carbonates. Of these minerals, the regression of ~20 have yet to be published. In due time, these will get their own proper publications, it is not the scope of this study to do them in detail. Such a documentation will be available in 1-2 years time. Rather some selected examples are presented below. The estimation of rate parameters was performed using the complete rate equation 1 and Equations 23-28. As such for a successful regression of experimental data, the rate must be known, along with the concentrations of all reactants at the conditions that rate was observed including  $[H^+]$ ,  $pCO_2$ ,  $[R]$ ,  $[OH^-]$ , as well as the reaction products in solution potentially contributing to retarding the dissolution reaction;  $[Ca^{2+}]$ ,  $[Mg^{2+}]$ ,  $[K^+]$ ,  $[Na^+]$ ,  $[Al^{3+}]$ ,  $[Al(OH)_4^-]$ ,  $[H_4SiO_4]$  (Sverdrup 1990, Sverdrup and Warfvinge 1995). The experiments must have been performed over sufficient reaction conditions for the parameters in Equation 29 to be estimated. In some cases, the data from different experimental studies were combined, to determine rate parameters or a reaction orders. During the regression process, experimental studies with insufficient data or documentation were omitted, unless the gap could be bridged with reasonable assumptions. Data regression was performed by rearranging equation (22) to:

$$k_H * \frac{[H^+]^{n_H}}{f_H} = r_{\text{Observed}} - \left( \frac{k_{H_2O}}{f_{H_2O}} + k_{CO_2} * \frac{P_{CO_2}^{n_{CO_2}}}{1 + K_{CO_2} * P_{CO_2}^{n_{CO_2}}} * \frac{1}{f_{CO_2}} \right. \\ \left. + k_R * \frac{[R]^{n_R}}{1 + K_R * [R]^{n_R}} * \frac{1}{f_R} + k_{OH} * \frac{[OH^-]^{n_{OH}}}{f_{OH}} \right) \quad (29)$$

In the acid to neutral pH range, such as  $pH < 7$ , this equation can be simplified in most instances by removing the OH-reaction to get (Sverdrup 1990):

$$k_H * \frac{[H^+]^{n_H}}{f_H} = r_{\text{Observed}} - \left( \frac{k_{H_2O}}{f_{H_2O}} + k_{CO_2} * \frac{P_{CO_2}^{n_{CO_2}}}{1 + K_{CO_2} * P_{CO_2}^{n_{CO_2}}} * \frac{1}{f_{CO_2}} \right. \\ \left. + k_R * \frac{[R]^{n_R}}{1 + K_R * [R]^{n_R}} * \frac{1}{f_R} \right) \quad (30)$$

and the in the acid pH range ( $pH < 4$ ), this may be reduced to:

$$k_H * \frac{[H^+]^{n_H}}{f_H} = r_{\text{Observed}} \quad (31)$$

By entering the concentrations of  $H^+$ , base cations, aluminium and silica into these equations, we can determine the rate coefficient,  $k_H$ , and  $f_{H^+}$ . When the experiment was performed in the absence of organic acids, as is often the case, Equation (29) reduces to:

---

et al., 1994, 2008, Oelkers and Gislason 2001, Olsen 2007, 2008, Olsson 2007, Opolot and Finke 2015, Oxburgh 1991, Oxburgh et al., 1994, Paces 1983, Palandri and Kharka 2004, Pokrowsky and Schott 2000a,b, 2002, Pokrowsky et al., 2004, Poulson et al., 1997, Prajapati et al., 2014, Price et al., 2005, Pigiobbe et al., 2009, Ragnarsdottir 1993, Ragnarsdottir and Graham 1996, Raschmann and Fedorockova 2008, Rietz 1995, Rimstidt et al., 2012, Ross 1969, Rosso and Rimstidt 1999, Rozalen et al., 2014, Running and Gower 1991, Saldi et al., 2007, Sanemasa and Katura 1973, Schnoor 1990, Schofield et al., 2015, Schott et al., 2009, 2012, Smith et al., 2013, Smits and Wallander 2016, Smits et al., 2014, Soler et al., 2008, Stephens and Hering 2003, Stillings and Brantley 1995, Stillings et al., 1996, Stockmann et al., 2008, Stumm and Wollast 1990, Stumm and Wieland 1990, Sverdrup 1990, 1996a,b, 1998, 2009, Sverdrup and Bjerle 1982, Sverdrup and Alveteg 1998, Sverdrup and Holmqvist 2016, Sverdrup and Warfvinge 1992a,b, 1995, Sverdrup et al., 1986, 1987, 1995a,b, 1998, 2002, 2006, 2008, 2010, Traven et al., 2005, Swoboda-Collberg and Drever 1993, Taylor et al., 1999, 2000, Taylor and Blum 1995, Taylor et al., 2017, Techer et al., 2007, Teir et al., 2007, Terry 1983a,b,c, Terry and Monhemius 1983, Thom et al., 2013, Valsami-Jones et al., 1998, Turpault and Trotignon 1994, Valsami-Jones et al., 1998, Voltini et al., 2012, Wang and Giammar 2012, Wang et al., 2017, Warfvinge and Sverdrup 1992a,b,c,d, 1993, 1995, Warfvinge et al., 1987, 1992, 1993, 1996, 2000, Weissbart and Rimstidt 2000, Welch and Ullman 1993, 1996, 2000, Westrich et al., 1993, White and Brantley 1995, 2003, White and Blum 1995, White et al., 1999, Whitfield et al., 2009, 2010, Wogelius and Walther 1991, 1992, Wolff-Boenisch et al., 2004a,b, 2011, Wood et al., 1999, Xie and Walter 1994, Yadaw and Chakrapani 2006, Yadaw et al., 2000, Yang and Steefel 2008, Yoo et al., 2009, Yu et al., 2016, 2017, Zabowski et al., 2007, Zhang and Bloom 1999a,b, Zhang et al., 1996, 2015, Zhang et al., 2013, Zhang and Lüttge 2017, 2009a,b, Zhu et al., 2010, Zassi 2009, Zavodsky et al., 1995, Zysset and Schindler 1996).

$$k_H * \frac{[H^+]^{n_H}}{f_H} = r_{\text{Observed}} - \left( \frac{k_{H_2O}}{f_{H_2O}} + k_{CO_2} * \frac{P_{CO_2}^{n_{CO_2}}}{1 + K_{CO_2} * P_{CO_2}^{n_{CO_2}}} * \frac{1}{f_{CO_2}} \right) \quad (32)$$

Some experiments were conducted at very low or with no dissolved CO<sub>2</sub> present and with organic ligands absent. In such cases, Equation (29) reduces to (Sverdrup 1990, Chin et al., 1991):

$$r_H = k_H * \frac{[H^+]^{n_H}}{f_H} = r_{\text{Observed}} - \frac{k_{H_2O}}{f_{H_2O}} \quad (33)$$

In this latter case, two reactions influence mineral dissolution rates: 1) the H<sup>+</sup> reaction, and 2) the water reaction. The variation of rates as a function of pH at such conditions consists of a ‘flat part’ where rates are controlled by the water reaction (Figure 15). At these conditions, by entering the concentrations of retarding base cations, aluminium and silica, the rate coefficients can be determined. In the semi-neutral region (pH 6-8), the expression may be a flat line and the rate expression is reduced to:

$$r_{\text{Observed}} = \frac{k_{H_2O}}{f_{H_2O}} + k_{CO_2} * \frac{P_{CO_2}^{n_{CO_2}}}{1 + K_{CO_2} * P_{CO_2}^{n_{CO_2}}} * \frac{1}{f_{CO_2}} + k_R * \frac{[R]^{n_R}}{1 + K_R * [R]^{n_R}} * \frac{1}{f_R} \quad (34)$$

When neither organic ligands nor CO<sub>2</sub> is present, and in the pH range of 6-8, this is reduced to:

$$r_{\text{Observed}} = \frac{k_{H_2O}}{f_{H_2O}} \quad (35)$$

With only organic acid ligands but no CO<sub>2</sub> present, and in the pH range of 6-8, the rate expression becomes:

$$r_{\text{Observed}} = \frac{k_{H_2O}}{f_{H_2O}} + k_R * \frac{[R]^{n_R}}{1 + K_R * [R]^{n_R}} * \frac{1}{f_R} \quad (36)$$

In the far alkaline region (pH 10-14), where we may assume that the OH<sup>-</sup> reaction will be dominant, the rate expression reduces to:

$$k_{OH} * \frac{[OH^-]^{n_{OH}}}{f_{OH}} = r_{\text{Observed}} \quad (33)$$

By entering the concentrations of base cations, aluminium and silica,  $f_{OH}$  can be determined and the rate coefficient,  $k_{OH}$ , and reaction order,  $n_{OH}$  be determined. The reaction order  $n_H$  and the coupled  $n_{OH}$  for the H<sup>+</sup> and the OH<sup>-</sup> reaction is derived from plots of the rate versus the solution pH

Figure 16 shows diagrams used to quantify the retarding effect of aluminium on the dissolution rate of albite feldspar. The figures were adapted from Sverdrup (1990) and the work prepared for Sverdrup and Warfvinge (1995) and Sverdrup et al., (2009). Similar results for aluminium were found by Oelkers (2001), Oelkers and Gislason (2001), Oelkers and Schott (2001, 1995a,b), Oelkers et al., (1999) for several minerals. The aluminium brake is very prominent in the range of log [Al] from -7 to -4.5. For further information, see Sverdrup (1990) and Sverdrup and Warfvinge (1995).

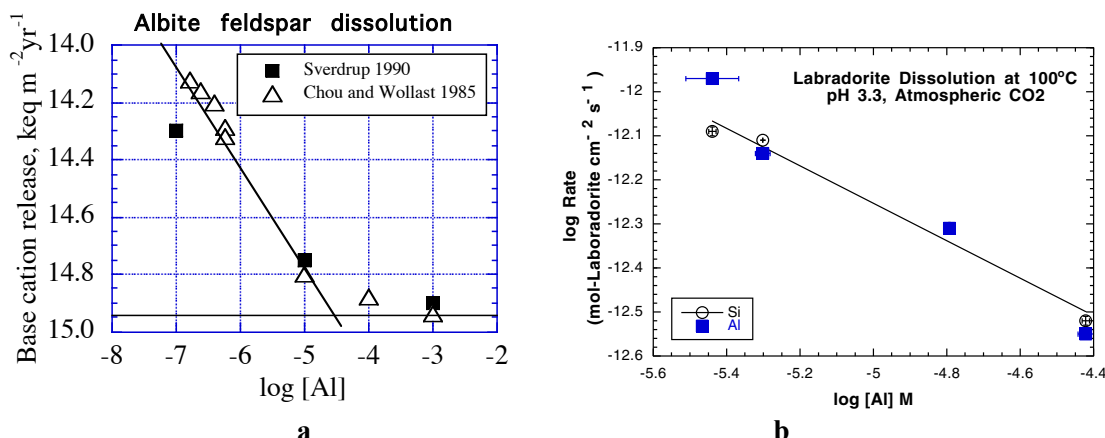

Figure 15. Regression plots showing the retarding or 'breaking' effect of aluminium on the dissolution rate of albite. The figures were adapted from Sverdrup (1990). The decrease of rates as a function of aqueous aluminium concentration (the aluminium brake) is very prominent in the range of  $\log [Al^{3+}]$  from -7 to -4.5. Aluminium concentrations are in  $\text{kmol m}^{-3}$ . The figures were adapted from (a) Sverdrup et al. (1990) and from (b) Carroll and Knauss (2001). For further information, see Sverdrup (1990) and Sverdrup and Warfvinge (1995).

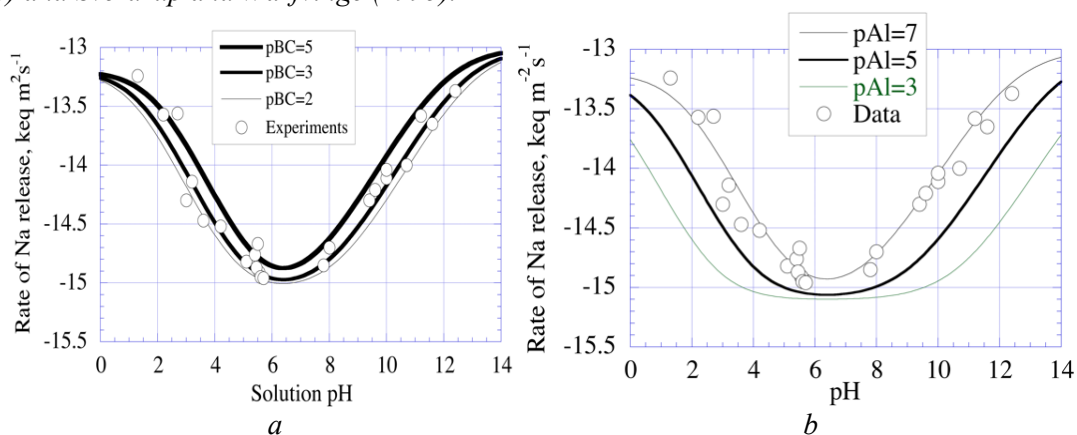

Figure 16. The effect on the base cation (a) and the aluminium concentration (b) on the dissolution rate of albite. (Sverdrup 1990). The circles represent the data from experiments, the solid lines the model simulations.

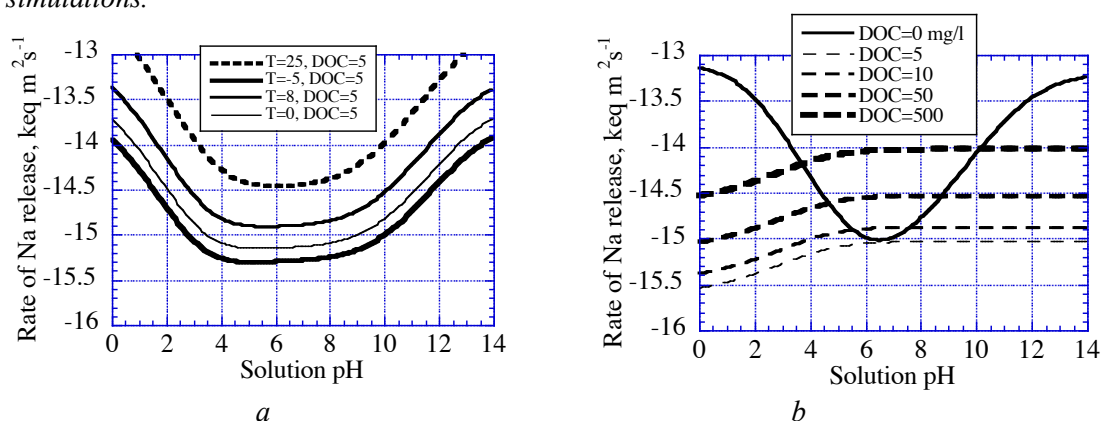

Figure 17. The effect on the base cation (a) and the aluminium concentration (b) on the dissolution rate of albite. The solid line is the reaction rate without  $CO_2$  or organic acid ligands.

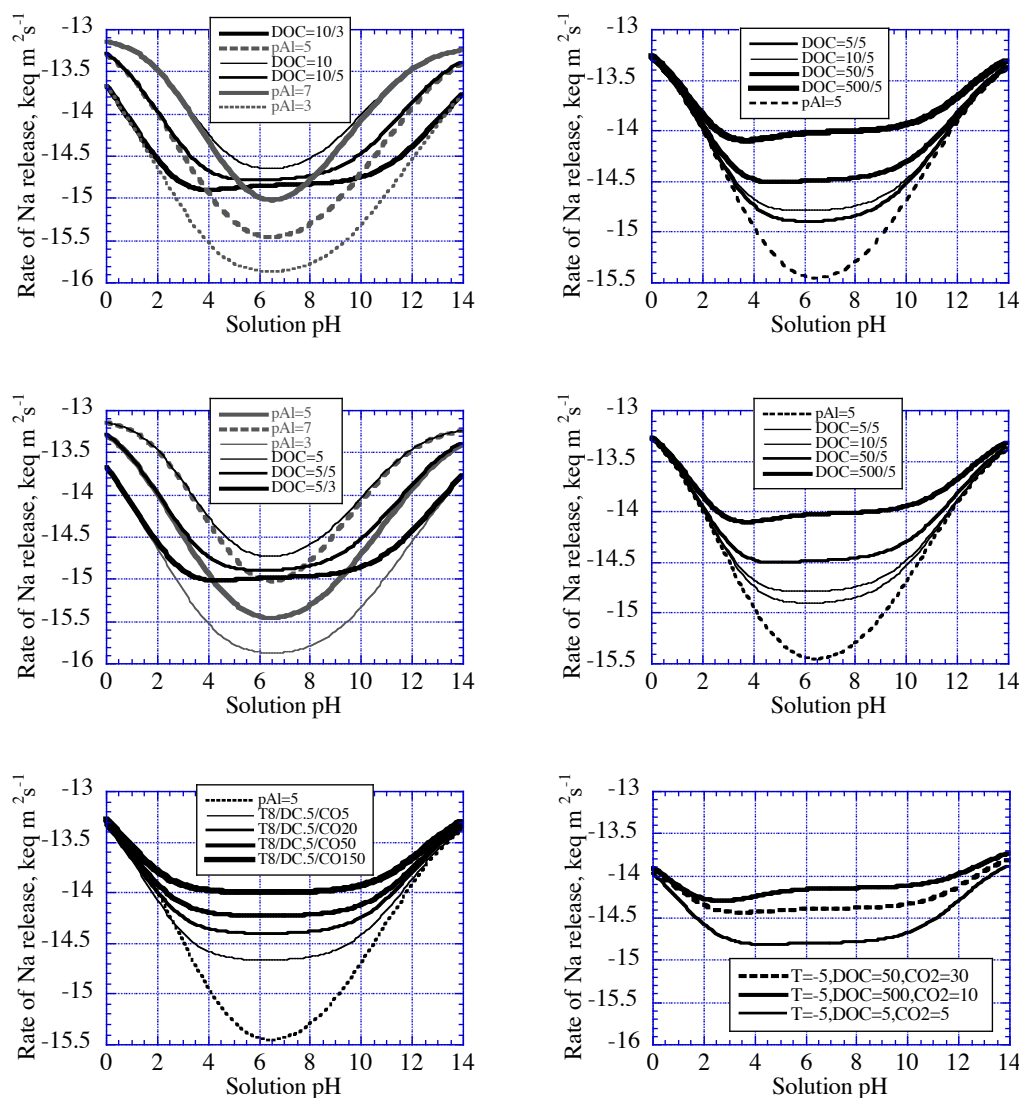

Figure 18. The weathering rate model was used to plot different combinations of conditions, to investigate the different shapes the weathering rate dependency can change (See Figure 10 and 12 for how the principle works). The experimental data were overlaid in such diagrams, to help retrieve kinetic parameters (e.g. rate coefficients and reaction orders). The last diagram, lower right, shows the combination of different combinations of organic acid ligand concentrations and  $\text{CO}_2$  pressures in atmospheres.

The reaction order for the organic acid reaction is derived from experiments where only the concentration of organic ligand,  $[\text{R}]$ , has been varied. This was found to be  $n_{\text{R}}=0.5$  on most experiments and this exponent value was universally adopted, suggesting a divalent ligand being the reactive agent (Sverdrup 1990, Sverdrup and Warfvinge 1995, Oelkers and Schott 1998).

The reaction order  $n_{\text{CO}_2}$  for the reaction with  $\text{CO}_2$  is difficult to constrain, as very few experiments that allow it to be determined are available (Daval et al., 2013, Berg and Banwart 2000, Golubev et al., 2005, Fernandez-Bastero et al., 2008, Hangx and Spiers 2009, Lagache 1965, Wogelius and Walther 1991, Wolff-Boenisch et al., 2011, Stephens and Hering 2004, Sverdrup 1990). The few experiments that are available often gives conflicting results. Moreover, many experiments dealing with the effect of  $\text{CO}_2$  on weathering do not have the required resolution to allow data regression. For the minerals where the  $\text{CO}_2$  has little or no effect, this is fine, but for some it is. It was found to be  $n_{\text{CO}_2}=0.6$  and was universally adopted. Sometimes these parameterizations can be determined by making single factor plots, but more often, the whole model must be used to recreate the experiments, taking many factors into account simultaneously. Figure 16 shows the effect on the base cation (a) and the aluminium concentration (b) on the dissolution rate of albite. Various plots

were used to help data interpretation. Figure 17-18 illustrates how the model was used to plot different combinations of conditions, to investigate how distinct factors affect the weathering rates. The experimental data were overlaid in such diagrams (Figures 16-20) to help interpretation towards kinetic parameters (rate coefficients and reaction orders), for example the combination of different organic acid ligand concentrations and aluminium concentrations. The last diagram, on the lower right of Figure 18, shows the combination of different combinations of organic acid ligand concentrations and CO<sub>2</sub> pressures in atmospheres. Figure 19 shows the effect on rates of the base cation (a) and the aluminium concentration (b) on the dissolution rate for albite. The circles represent the data from experiments.

A further example of parameterization efforts is shown in Figure 19 for the case of hornblende dissolution rate data reported by from Holmqvist and Sverdrup (2004) and Holmqvist et al. (2002, 2003). Figure 19a and 19b shows these data as a function of pH. The figures were adapted from Holmqvist et al., (2003). Figure 19c shows the retarding effect of aluminium on the dissolution rate of hornblende, adapted from Holmqvist et al. (2003). Figure 19d shows a three-dimensional plot for the dissolution rate of hornblende, as a function of solution pH and aluminium concentration (Sverdrup, 1990).

In total, the dissolution rate of hornblende is defined by at least 8 and perhaps 9 different chemical factors including pH, Ca+Mg, K, Na, Al, DOC, CO<sub>2</sub>, Si and sometimes Fe, and in addition to mineral surface area, soil wetting degree and temperature. For example changes in the aluminium concentration, can change the weathering rate by several orders of magnitude. Additional examples are presented in Figs. 20-24.

Figure 20 shows a typical example of data generated for different minerals during the 1996-2002 field seasons using a continuous, flow through, fluidized bed, with constant concentration feed solutions. Figure 21 shows the experimentally measured dissolution rates of epidote, after Holmqvist et al. (2003), as a function of pH according to a number of weathering experiments. The release of all relevant ions was monitored by frequent sampling during the experiments. Figure 22a shows the activation energy for the dissolution of epidote. The dependence of the dissolution rate of epidote on the calcium concentration at pH 2 and pH 4 is shown in Figure 22b. Figure 23 and 24 shows data from Holmqvist and Sverdrup (2004) and Holmqvist et al. (2002, 2003) confirming that an arithmetic addition of the various rate contributions gives the best fit of the data, consistent with the principle shown in Figure 10. Figure 24 shows results from hornblende, the bottom diagrams (A, B) shows results from a natural illite mineral extracted from an agricultural soil sample taken at the agricultural research site at Lanna, Swedish Agricultural University, Uppsala, Sweden. Model lines were fitted to the data points to set the rate coefficients and reaction orders. Note that a complete set of kinetic parameters could not be directly generated for all minerals due to incomplete experimental data sets. Estimates for some of the rate coefficients in Table 3 were based on mineral crystal structure analogies (Sverdrup 1990, Holmqvist 2003, Sverdrup and Stiernquist 2002, Crundwell 2014a,b, 2016), crystal bond energies (Sverdrup 1990, Velbel 1999, Crundwell 2014b, 2016) and comparison with analogue minerals. For many of the minerals, the dissolution kinetics patterns are very consistent. The dissolution rate curve shapes of feldspars, garnets, olivines, zoisites allow for this, but also muscovite to illite alteration series, K-feldspar to sericite alteration series.

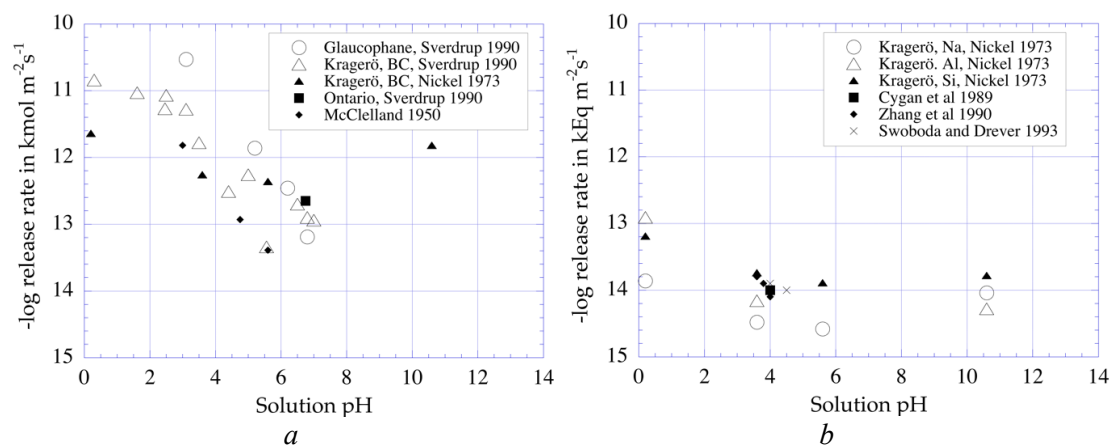



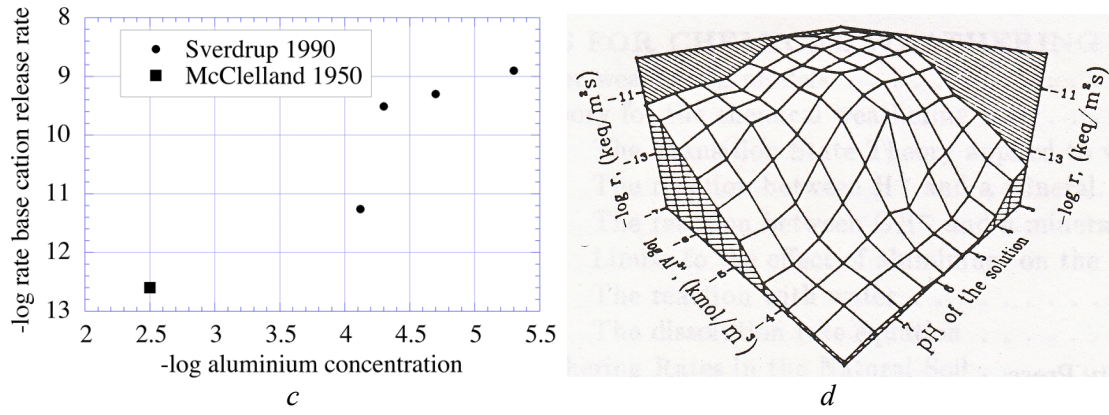

Figure 19. Diagram (a) shows the dissolution rate of minerals presented as base cation release rates as a function of pH and (b) shows the dissolution rate for hornblende as a function of solution pH, but under different experimental conditions (Adapted from Sverdrup, 1990). Diagram (c) shows the retarding effect of aluminium on the dissolution rate of hornblende. (Adapted from Holmqvist et al., 2003). Diagram (d) shows a three-dimensional plot for the dissolution rate of hornblende, as a function of solution pH and aluminium concentration (Adapted from Sverdrup, 1990).

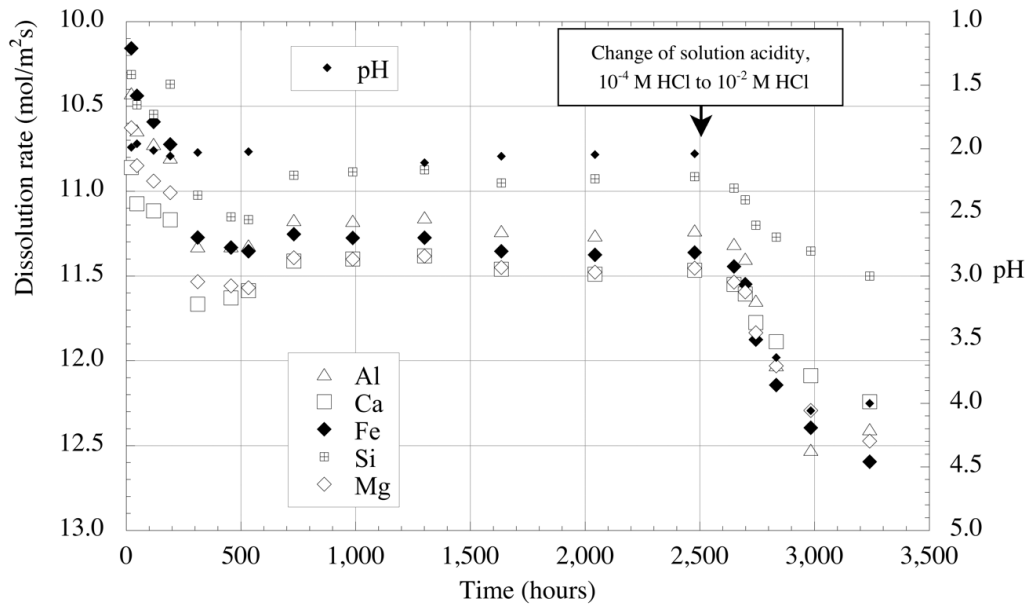

Figure 20. Typical example of dissolution rate data generated for epidote during 1996-2002 using a continuous, flow through, fluidized bed, with constant concentration feed solutions (Holmqvist 2002, 2003). All relevant constituents of the mineral were monitored in the aqueous solution in the experiment.

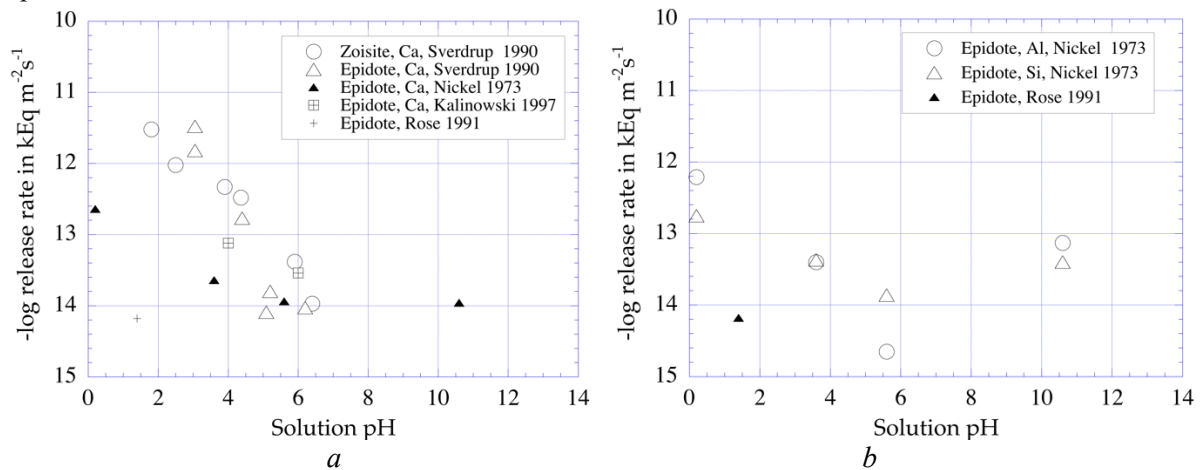

Figure 21. Epidote dissolution rate versus pH according to experiments reported by Holmqvist and Sverdrup and other literature sources data.

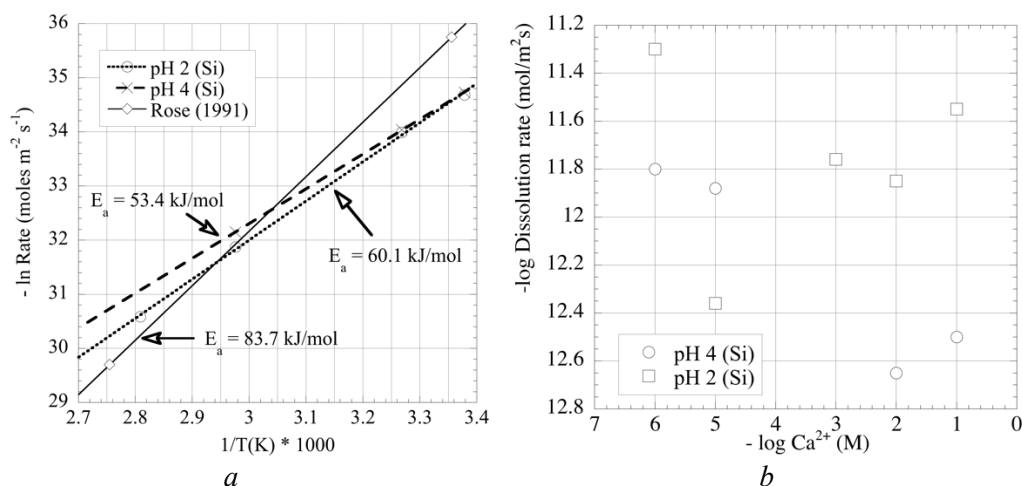

Figure 22. a) Estimates of the energy of activation for the dissolution of epidote. (b) the dependence of the rate of epidote on the calcium concentration at pH 2 and pH 4 (From one series of experiments by the authors).

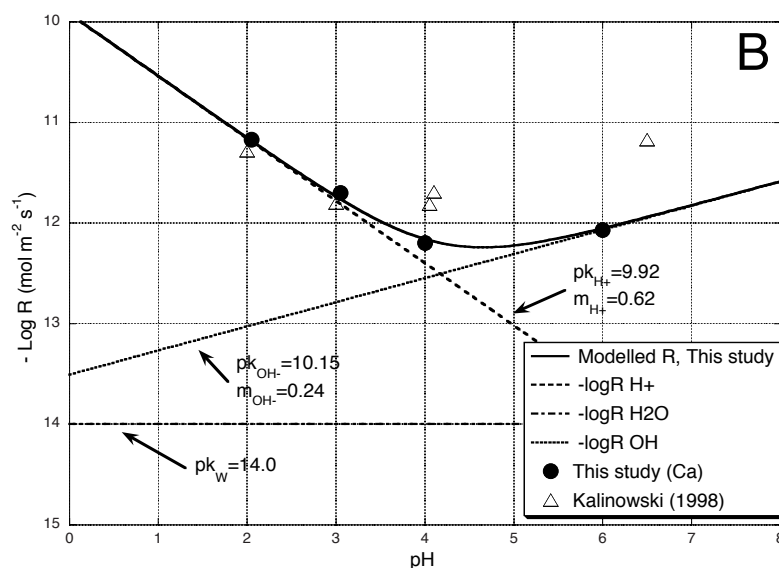

Figure 23. Hornblende dissolution rate data from Holmqvist and Sverdrup (2004) and Holmqvist et al, (2002, 2003) suggests that an arithmetic addition gives a good fit to the data.

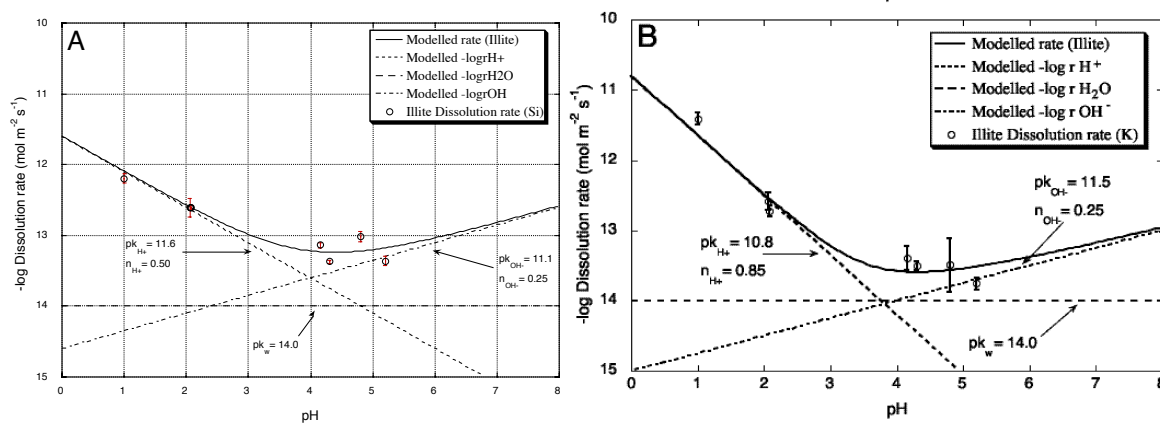

*Figure 24. Diagram A show regression results from hornblende dissolution rates, diagram (B) shows regression results from a natural illite mineral dissolution extracted from an agricultural soil sample taken at the agricultural research site at Lanna, Uppsala, Sweden. Data from Holmqvist and Sverdrup (2004) and Holmqvist et al. (2002, 2003)*

For example, for the feldspars, we have the data to parameterize the  $H^+$  reaction for 5 different plagioclases, the mixed composition plagioclases from albite to anorthite. A plagioclase with a different composition will be interpolated between these as shown in Figure 25. We have the same situation for K-feldspars with increasing contents of Na and Ca, giving a systematic shift in parameter values. The pattern is very consistent as can be seen from the diagrams shown in Sverdrup (1990). However, for the  $OH^-$  reaction we have less information. The  $OH^-$  rate equation is theoretically linked to the  $H^+$  reaction, but more sensitive to the concentration of the same base cation as in the mineral (Na, K, Ca). With the available data and the theoretical link, we can estimate the missing parameters for some of the feldspars. There is a similar situation for the  $H_2O$  reaction. We have the experiments that allow it to be constrained for most of the feldspars, and the shifts between the feldspars are systematic and consistent.

For the reaction with organic acid ligands, the situation is more complex. Many of the dissolution experiments run with organic acids were poorly documented, and getting accurate parameterization out of them is not possible. For some minerals like feldspars and olivine, some experimental results are available (Stillings et al., 1996 is one example for feldspar) that allow for kinetic parameter estimation. They found  $n_R=0.75$  in the range pH 3-7. For other minerals, we have only single experiments, scattered among some few minerals. Few experiments are available, and for only a few types of minerals. These provide suggestions on what the parameter values probably would be. The situation is similar for the reaction between the mineral surface and  $CO_2$ . The reaction seems to be weak, and only play a role at elevated pressures. For example, Wang (2013), based on the experimental results of Hanchen et al. (2006) concluded there was no effect of the  $CO_2$  reaction on olivine dissolution rates beyond the effect caused by  $CO_2$  on pH.

Retrieved kinetic parameters are provided in Table 3. Parameters that are derived directly from one or more experiments are given in **bold** font. The kinetic parameters that were estimated are shown in roman font. The minerals in this table are divided into 11 groups of basic crystalline structures. Some of the minerals inside each group have large commonalities with respect to how they dissolve, and this was of great help in parameter estimation table.

For feldspars, nesosilicates and phyllosilicates, the amount of experimental data available makes the retrieved parameters robust. If three different compositions of basically the same type of mineral, A, B and C, are known to have relative rates  $A>B>C$ , and we have the kinetic parameters for A and C, then we can be fairly certain that the values for the kinetic parameters for B are constrained between A and C (see Figure 25). If they are close, then we would be able to set parameters for B fairly accurately, even with sparse experimental data for B. This is the case for many minerals (In particular feldspars, nesosilicates, phyllosilicates), and is a way to get more parameterization out of a limited experimental data sets. For the pyroxenes and amphiboles, the experiments indicate that the minerals behave with some variety depending on their composition, making the estimates less accurate. But, many pyroxenes are mixtures of definable end members and this was utilized to interpolate and estimate missing parameters.

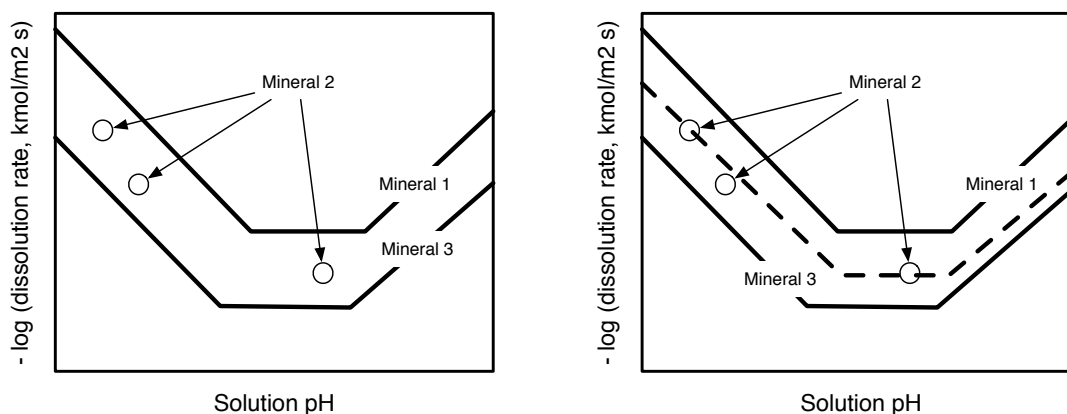

a: Data points drawn in

b: Interpolate line

Figure 25. Some mineral groups have very similar dissolution rate behaviours. Such similarities can be used to interpolate between them (b) when we have intermediate minerals with only a few data points available (a).

Nevertheless all parameters in Table 3 together with their kinetic expressions should be further validated as additional experimental data become available. The ultimate test of the kinetics equations and parameters are how well they describe both laboratory experiments and field data where independent estimates of the weathering rate are available. Such tests have been generally successful (see the publications referred to earlier, and Erlandsson Lampa et al., 2016, 2019), suggesting that the combined methodology (experiments, analogues, interpolations, estimates based on theoretical rescaling, predictions made based on crystal bond energies) have captured the kinetics sufficiently well. More on this will be forthcoming in future publications.

## 5. Results

### 5.1. Kinetics and parameterization

The tabulated kinetic coefficients are the major result of this report and they are provided in the Tables 1, 3 and 4. In total the dissolution kinetics parameterization for 93 minerals are provided. This was first prepared as an update for the 2016 Ystad Workshop. After the workshop, Sverdrup revised and expanded the tables. Erlandsson-Lampa et al. (this volume) tested the values using the model on the Svartberget research site as a field evaluation.

The parameters in Table 3 are for a temperature of 8°C and standard atmospheric pressure. The numbers in bold in Table 3 represent direct measurement, normal font parameters were estimated by interpolation from analogues. The following default approximations were adopted due to the lack of data;  $C_{Al}$  for the  $H^+$ -reaction is taken to be equal to  $1/3$  of the  $C_{Al}$  for the  $OH^-$ -reaction.  $C_{BC}$  for the  $H^+$ -reaction is taken to be  $1/3$  of the  $C_{BC}$  for the  $OH^-$ -reaction. The retarding reaction orders for base cations (x), aluminium (y) and silicate (z) have been extracted from separate datasets and experiments where it was possible to separate out the effect of silicate alone, having subtracted the effect of base cations and aluminium first. Default values were computed and scaled with Madelung crystal lattice site energy (See Sverdrup 1990 and Velbel 1999 for how a-priori weathering rate coefficient estimates are made from crystal properties). Irreversible dissolution implies that the mineral cannot be formed from solution under soil conditions, and that there is no saturation concentration or back reaction. Pokrovsky and Schott (2000) and Rosso and Rimstidt (2000) reports a reaction order of  $n_{H^+}=0.5$  for forsterite, but others report  $n_{H^+}=1.0$  (Grandstaff 1986, Blum and Lasaga 1988, Siegel and Pfannkuch 1984, Sverdrup 1990).  $n_{H^+}=1.0$  seems to be a property of the nesosilicate group, but there is a possibility that presence of impurities such as pyroxenes or feldspars in the nesosilicate may give it a different crystal structure and thus a different  $n_{H^+}$ . Others, Berg and Banwart (2000), report  $n_{H^+}$  in the range 0.5 to 1, depending on pH.

Table 4 shows the temperature dependencies of the dissolution rates. All variations of rates on temperature are computed using a modified Arrhenius equation (Sverdrup 1990, 1998, Sverdrup and Warfvinge 1988, 1992, 1995). Parameters for this equation generated from experimentally measured rates are shown in bold. Where experimental data were not available, estimates were computed and scaled with Madelung crystal lattice site energy from garnet (Sverdrup 1990, Velbel

1999). Values in normal font were estimated from the lattice energies and the properties of the mineral surface. Table 5 shows the stoichiometry of the minerals considered in this study.

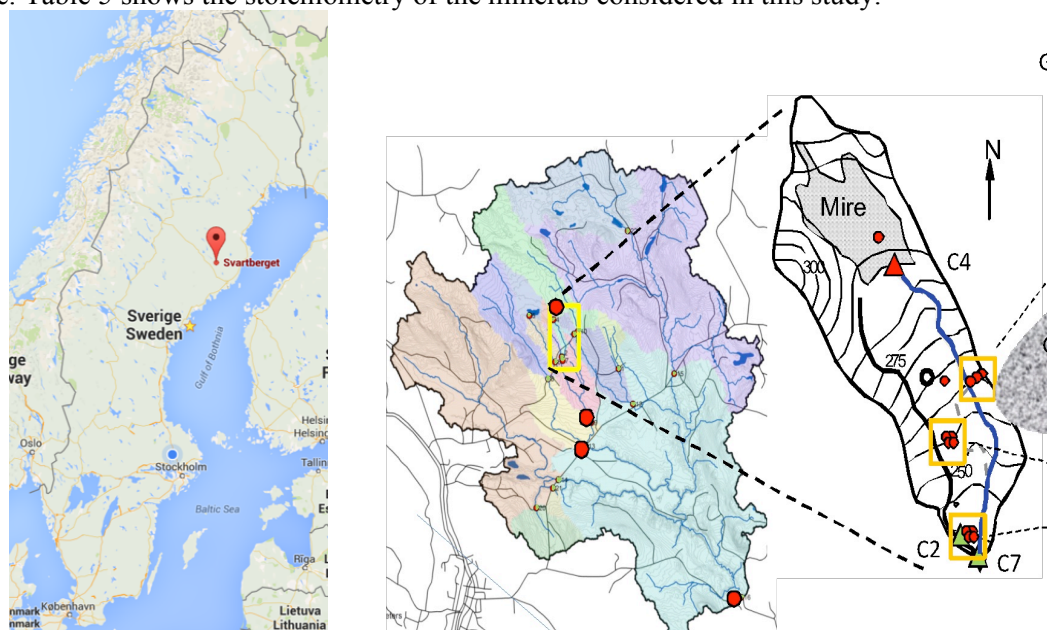

Figure 26. Location of the Svartberget research site in Northern Sweden. The colours delineate the different subcatchments of the Svartberget research area. The map on the left shows the catchment considered in this comparison.

## 5.2. Testing the model

The most recent comparison between model results and field observations follows in the article by Erlandsson-Lampa et al. (This issue). The research catchment where many of the model applications have been tested is located in Northern Sweden (Figure 26). A few examples are shown in Figure 27 and 28. Figure 27 shows a comparison between calculated and observed base cation concentrations at the Svartberget research site. The model results reproduce the observed concentration pattern (Zanchi et al., 2016). Figure 27a shows the modelled base cation ( $Bc$ )<sup>3</sup> concentration and Figure 27b shows the Si concentrations, plotted against  $\log_{10}$  of water transit time (smooth lines). Overlaid are the observed Bc and Si-concentrations from the soil profile, plotted against  $\log_{10}$  of soil depth (solid lines with markers). The weathering model considers all soil processes including ion exchange, vegetation interactions, decomposition of organic matter, water transport in the catchment in both the horizontal and vertical directions (Belyazid et al., 2004, 2011a,b, 2010a,b, 2015, 2019, Erlandsson-Lampa et al., 2019, Sverdrup et al., 1995, 2002). The model reproduces the observed field observations as a function of depth (Zanchi et al., 2016). The close correspondence between the calculated dissolved metal concentrations and the field observation are notable considering that we employed a silicate dissolution rate model based on laboratory measurements to determine the composition of the aqueous phase in the soil.

## 5.3. Discussion

The detailed comparisons between laboratory measured and field determined weathering rates generated using the kinetic models described above coupled to soil processes performed using PROFILE and ForSAFE stand out in stark contrast to the traditional geochemical models, which give results that are several orders of magnitude different (Erlandsson-Lampa et al., 2019). It was discovered that past efforts to describe field weathering rates using laboratory measured dissolution rates without consideration of the coupling of rates to the major soil processes yielded inaccurate results (Model types represented by codes such as PHRQKIN and similar codes) – see Erlandsson

<sup>4</sup>There seems to be some type of CO<sub>2</sub> saturation of the surface between 10 and 50 atm CO<sub>2</sub> for mica and chlorites, beyond where the rate is no more affected. Some other minerals have indications of similar behaviour, but it remains elusive in terms of parameterization. Some minerals appear to have no detectable reaction with CO<sub>2</sub>, some are slightly inhibited.

Lampa et al. (2016) and Nyström-Claesson and Andersson, (1996). Such observations demonstrate a need to take into account the complete set of processes occurring in the soil.

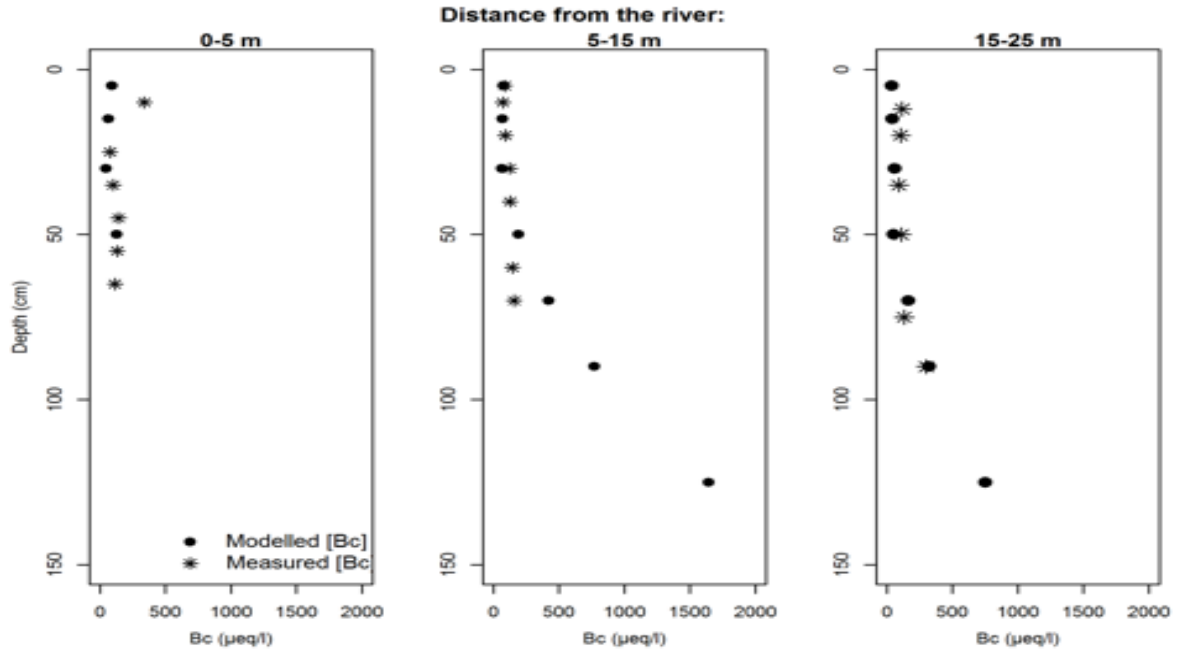

Figure 27. Comparison of calculated with measured base cation concentrations at the Svartberget field site, (Zanchi et al., 2016). Note the base cation concentrations ([Bc]) refer to the sum of the concentrations of Na, H, Ca, and Mg in units of microequivalents per litre.

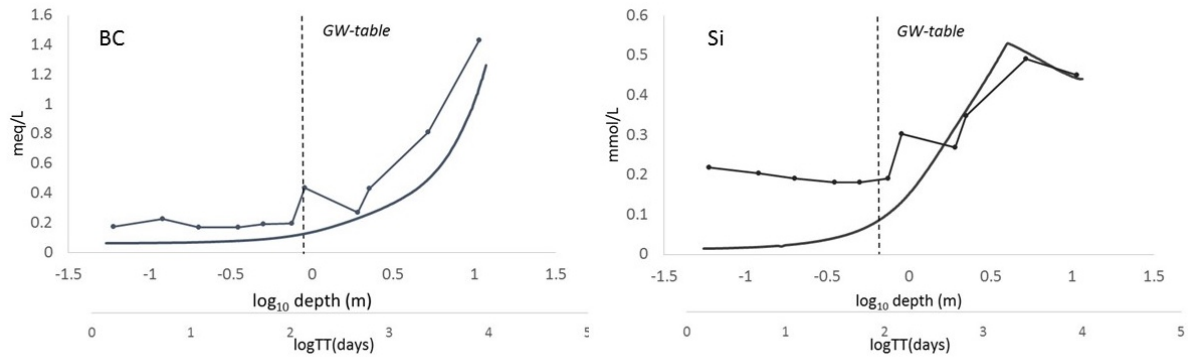

a: Base cations

b: Silica

Figure 28. Modelled base cation (a) and Si (b) concentrations plotted against  $\log_{10}$  of water transit time (smooth lines) at the Svartberget field site (See Erlandsson-Lampa et al., 2016, 2019 for a full description of the field test of the model). Overlain are the observed base cation and Si-concentrations from the soil profile, plotted against  $\log_{10}$  of soil depth (straight lines with symbols).

Note that the mineral dissolution ‘brake functions’ used in this approach act differently on the weathering rates than the equilibrium expressions used in earlier models (Aagaard and Helgeson 1982, Murphy et al., 1987, Alekseyev et al., 1997, 2004, 2007, Oelkers, 2001, Oelkers et al., 1994, 2001, 2008). The preference for using the brakes rather than the traditional rate expression based on a slowing of rates as equilibrium is approached between the surface and the liquid is that equilibrium is not approached for many primary silicate minerals and thus the weathering process is irreversible.

## 7. Conclusions

The complex nature of weathering in the field is nearly impossible to interpret without a comprehensive model for the whole process. A first step to such interpretations can be the quantitative description of the dissolution rates of the major rock forming minerals. Even the dissolution rates of an



individual mineral can involve several simultaneous reactions. Thus, experimentally measured rates results can only be accurately interpreted when a full system model is used. Under field conditions, mineral dissolution is coupled to other soil processes, and thus a full ecosystem system model is needed for their interpretation. The apparent difference between field and laboratory dissolution rates arise from the coupling of these processes, and disappear once a full model is employed. Use of a fully coupled model shows these differences to be negligible (Keegan and Laskow-Lehey 2014).

Taking account the vast literature reporting experimentally measured mineral dissolution rates, it was possible to create a fully parameterized kinetic database for about 100 minerals. About 40% of the kinetic parameters were determined directly from experiment interpretations, and the rest were determined from inter-mineral interpolations and using of analogues.

The adjustment of the aluminium ‘brake function’ and the introduction of a silica “brake function” as described in this work were necessary to improve the description of weathering rates in the lower part of the soil, below 1 meter depth. The test at the Svartberget catchment suggests that this revised mineral dissolution model works adequately as can be seen from Figures 27-28.

## 8. Acknowledgements

This work is based upon that of Prof. Dr. Harald Sverdrup and Prof. Dr. Per Warfvinge who initiated the new model approaches in the 1980's. Since then major contributions have been made by Dr. Matthias Alveteg (Uncertainty, programming the code), Prof. Per Warfvinge (Programming the code), Dr. Cecilia Akselsson (Regional parameterizations, geostatistics), Dr. Salim Belyazid (Programming the code, applying the model) and Daniel Kurz (Adaption of the mineral stoichiometry, adaptation to Switzerland). Dr. Johan Holmqvist and Harald Sverdrup were instrumental in taking up a second long campaign in weathering experiments, generating more kinetic data during 1997-2004. Dr. Johan Holmqvist carefully worked out the geostatistics of landscape sampling and robustness of regional parameterizations and creating geostatistically sound regional weathering rate maps), Dr. Salim Belyazid is the present head code editor of the PROFILE and ForSAFE models.

This study was a part of the QWARTZ Project, coordinated by Prof. Kevin Bishop, Uppsala University, Sweden. Dr. Salim Belyazid, Natural Geography and Quaternary Geology, Stockholm University, Sweden, Dr. Martin Erlandsson Lampa, Institute of Hydrology, University of Uppsala, Sweden, Dr. Cecilia Akselsson, Earth Sciences, Lund University, Lund, Sweden, Daniel Kurz, EKG Geoscience, Bern, Switzerland, Dr. Max Posch, CCE, RIVM, Bilthoven, Netherlands, Dr. Julian Aherne, Ecology, University of Trent, Canada, Dr. Jennifer Phelan, RTI Inc, Triangle Park, North Carolina, United States of America and Professor Harald Sverdrup, Industrial Engineering, University of Iceland, Reykjavik, Iceland (Earlier at Lund University) took part in the parameterization workshops, with the aim to have this updated kinetics database completed.

Professor Dr. Eric Oelkers was external advisor to the project, which turned out to be a good choice. He participated very willingly, eagerly and with excellent advice to the research process and in writing this paper.

## 9. References

- Aagard, P. and H. C. Helgeson, Thermodynamic and kinetic constraints on reaction rates among minerals and aqueous solutions: I. Theoretical considerations. **American Journal of Science** 282: 237-285. 1982.
- Adebayo, A.O., Ipinmoroti, K.O., Ajayi, O.O., Dissolution Kinetics of Chalcopyrite with Hydrogen Peroxide in Sulphuric acid Medium **Chem. Biochem. Eng. Q.** 17, 213–218. 2003
- Ajemba, R.O., and Onukwuli, O.D. Dissolution kinetics and mechanisms of reaction of Udi clay in nitric acid solution **American Journal of Scientific and Industrial Research.** 3, 115-121. 2012
- Alekseyev, V.A. Equations for the Dissolution Reaction Rates of Montmorillonite, Illite, and Chlorite. **Geochemistry International**, 45: 770–78. 2007
- Alekseyev, V.A., Medvedeva, L.S., Prisyagina, N.I., Meshalkin, S.S., Balabin, A.I. Change in the dissolution rates of alkali feldspars as a result of secondary mineral precipitation and approach to equilibrium. **Geochimica et Cosmochimica Acta** 61, 1125–1142. 1997
- Akselsson, C., Holmquist, J., Alveteg, M., Kurz, D., Sverdrup, H. Scaling and mapping regional calculations of soil chemical weathering. **Water, Air and Soil Pollution Focus** 4:671-681. 2004
- Akselsson, C., Sverdrup, H., Holmqvist, J. Estimating weathering rates of Swedish forest soils in different scales, using the PROFILE model. **Journal of Sustainable Forestry.** 21:119-131. 2005
- Akselsson, C., Holmqvist, J., Kurz, D., Sverdrup, H. Relations between elemental content in till, mineralogy of till and bedrock mineralogy in the province of Småland, Southern Sweden. **Geoderma** 136:643-659. 2006
- Akselsson, C. and Sverdrup, H. Uthålligt skogsbruk i Sverige-räcker baskajonvittringen till?. In: Melkerud, P., Markdagen 2004, Nytt från forskningsfronten. 43-50. 2004
- Akselsson, C., Westling, O., Sverdrup, H., Holmqvist, J., Thelin, G., Uggla, E., Malm, G. Impact of harvest intensity on long term base cation budgets in Swedish forest soils. **Water, Air and Soil Pollution: Focus** 7:201-210. 2007
- Akselsson, C., Westling, O., Sverdrup, H., Holmqvist, J., Thelin, G., Uggla, E., Malm, G. Impact of Harvest Intensity on Long-Term Base Cation Budgets in Swedish Forest Soils. **Water, Air, and Soil Pollution: Focus** 7: 201-210. 2007

- Akselsson, C., Fölster, J., Rapp, L., Alveteg, M., Belyazid, S., Westling, O., Sverdrup, H., Stendahl, J. Bara naturlig försurning. Underlagsrapport reviderade beräkningar av kritisk belastning för försurning. I: Naturvårdsverkets Rapport 5780, Bara naturlig försurning Bilagor til underlagsrapport fördjupad utvärdering av miljömålen, Bilaga 7:103-147. 2007
- Akselsson, C., Westling, O., Alveteg, M., Thelin, G., Fransson, A.M., Hellsten, S., The influence of N load and harvest intensity on the risk of P limitation in Swedish forest soils. *Science of the Total Environment*. 404, 284-289. 2008
- Akselsson, C., Westling, O., Alveteg, M., Thelin, G., Fransson, A-M., Hellsten, S., The influence of N load and harvest intensity on the risk of P limitation in Swedish forest soils. **Science of The Total Environment**. 404, 284-289. 2008
- Akselsson, C., Belyazid, S. Critical biomass harvesting – Applying a new concept for Swedish forest soils. **Forest Ecology and Management** 409, 67-73. 2018
- Akselsson, C., Olsson, J., Belyazid, S., René Capell, R. Can increased weathering rates due to future warming compensate for base cation losses following whole-tree harvesting in spruce forests? **Biogeochemistry** 128:1-2, 89-105. 2016
- Albin, S., Building a system dynamics model; Part I; Conceptualization. MIT System Dynamics Education Project (J. Forrester (Ed)). MIT, Boston. 34pp. <https://ocw.mit.edu/courses/sloan-school-of-management/15-988-system-dynamics-self-study-fall-1998-spring-1999/readings/building.pdf>. 1997
- Alveteg, M., and Sverdrup, H. Gothenburg Protocol: Uncertainty as to effects, **Acid News** 2, June 2000.
- Alveteg, M., Sverdrup, H., Warfvinge, P., Regional assessment of dynamic aspects of soil acidification in southern Sweden. **Water, Air and Soil Pollution** 85:2509-2514. 1996
- Alveteg, M., Walse, C., Sverdrup, H. Evaluating simplifications used in regional applications of SAFE and MAKEDEP models. **Ecological Modelling** 107:265-277. 1998
- Alveteg, M., Barkman, A., Sverdrup, H. Integrated Environmental Assessment Modelling - Uncertainty in Critical Load Assessments. Final Report of the Swedish Subproject, EU/LIFE project. *Reports in Ecology and Environmental Engineering* 2000:1-163.
- Alveteg, M., Sverdrup, H., Warfvinge, P. 1995 Developing a kinetic alternative in modelling soil aluminum. **Water, Air and Soil Pollution**, 79:377–389
- Ameli, A.A., Beven, K., Erlandsson, M., Creed, I.F., McDonnell J.J., Bishop, K. Primary weathering rates, water transit times, and concentration-discharge relations: A theoretical analysis for the critical zone, **Water Resources Research** 53, 942–960, 2017
- Amram, K. and Ganor, J. The combined effect of pH and temperature on smectite dissolution rate under acidic conditions. **Geochimica et Cosmochimica Acta** 69, 2535–2546. 2005
- Amrhein, C. and Suarez, D.L. Some factors affecting the dissolution kinetics of anorthite at 25 8C. **Geochimica et Cosmochimica Acta** 56, 1815–1826. 1992
- Anbeek, C. The dependence of dissolution rates on grain size for some fresh and weathered feldspars. **Geochimica et Cosmochimica Acta** 56, 3957–3970. 1992a
- Anbeek, C. Surface roughness of minerals and implications for dissolution studies. **Geochimica et Cosmochimica Acta** 56, 1461–1469. 1992b
- Anbeek, C., van Breemen N., Meijer E.L., van der Plas, L. The dissolution of naturally weathered feldspar and quartz. **Geochimica et Cosmochimica Acta** 58, 4601–4614. 1994
- Andersson, B., Bishop, K., Borg, G.C., Gielser, R., Hultberg, H., Huse, M., Moldan, F., Nyberg, L., Nygaard, P.H., Nyström, U. The covered catchment site: A description of the physiography, climate and vegetation of three small coniferous forest catchments at Gårdsjön, South-west Sweden. In: Hultberg H. and Skeffington R. (Eds.) *Experimental reversal of acid rain effects; The Gårdsjön roof project*: 25-70. John Wiley Science. 1998
- Aradottir, E.S.P., Sigfusson, B., Sonnenthal, E.L., Björnsson, G., Jonsson, H. Dynamics of basaltic glass dissolution – Capturing microscopic effects in continuum scale models. **Geochimica et Cosmochimica Acta** 121: 311–327. 2013.
- Augustin, F., Houle, D., Gagnon, C., Courchesne, F. Evaluation of three methods for estimating rates of base cations in forested catchments. **Catena** 144, 1-10, 2106.
- Ballesta, R., Cabrero, B., Sverdrup, H., Critical loads for different soils of the Mediterranean environment. **The Science of the Total Environment** 181:65-71. 1996
- Balogh-Brunstad, Z., Keller, C.K., Bormann, B.T., O'Brien, R., Wang, D., Hawley, G. Chemical weathering and chemical denudation dynamics through ecosystem development and disturbance, *Global Biogeochem. Cycles*, 22, GB1007, doi:10.1029/2007GB002957. 2008
- Bandstra, J.Z., Buss, H.L., Campen, K., Liermann, L.J., Moore J., Hausrath, E.M., Navarre, A.K., Jang, J-H., Brantley, S.L. *Appendix: Compilation of Mineral Dissolution Rates*, in *Kinetics of Water-Rock Interaction*, S. L. Brantley, J. D. Kubicki and A. F. White (eds.). Springer, New York, 731-808. 1998
- Barkman, A., Schlyter, P., Lejonklev, M., Alveteg, M., Warfvinge, P., Sverdrup, H., Arnström T. Uncertainties in high resolution critical load assessment for forest soils - possibilities and constraints of combining distributed soil modelling and GIS. **Environmental and Geographical Modeling**, 3:2:125-143, 1999
- Barkman, A., and Sverdrup, H., Critical loads of acidity and nutrient imbalance for forest ecosystems in Skåne. *Reports in Environmental Engineering and Ecology*, 1:96, Chemical Engineering II, Box 124, Lund University. 221 00 Lund, Sweden, 1996
- Barkman, A., and Alveteg, M., Identifying potentials for reducing uncertainty in critical load calculations using the PROFILE model. **Water, Air and Soil Pollution**. 125, 35-54 2001.
- Beig M.S., and Lüttge A. Albite dissolution kinetics as a function of distance from equilibrium: implications for natural feldspar weathering. **Geochimica et Cosmochimica Acta** 70:1402–1420. 2006
- Bélanger, N., Côté, B., Courchesne, F., Fyles, J.W., Warfvinge, P. and Hendershot, W. H. Simulation of soil chemistry and nutrient availability in a forested ecosystem of southern Quebec. I. Reconstruction of time-series files of nutrient cycling using the MAKEDEP model. **Environ. Model. Soft.** 17: 427–445. 2002a

- Bélanger, N., Courchesne, F., Côté, B., Fyles, J.W., Warfvingue, P., Hendershot, W.H. Simulation of soil chemistry and nutrient availability in a forested ecosystem of southern Quebec. Part II. Application of the SAFE model. **Environ. Mod. Soft.** 17: 447–465. 2002b.
- Belyazid, S., Sverdrup, H., Alveteg, M. The biogeochemical models family of the biogeochemistry group at Lund University. Proceedings from a UN/ECE conference held in Pushino, Russia September 16–18, 2004. Institute of Soils Science and Phytobiology, Nauka, September 2004.
- Belyazid, S., Westling, O. Sverdrup, H. Modelling changes in soil chemistry at 16 Swedish coniferous forest sites following deposition reduction. **Environmental Pollution** 144:596–609. 2006
- Belyazid, S., Bailey, S., Sverdrup, H. Past and Future Effects of Atmospheric Deposition on the Forest Ecosystem at the Hubbard Brook Experimental Forest: Simulations with the Dynamic Model ForSAFE In: *Modelling of Pollutants in Complex Environmental Systems*, Volume II: 357–377, Hanrahan, G. (Ed.) ILM Publications, International Labmate Limited. 2010
- Belyazid, S., Sverdrup, H., Kurz, D., Braun, S. Exploring ground vegetation change for different scenarios and methods for estimating critical loads for biodiversity using the ForSAFE-VEG model in Switzerland and Sweden. **Water, Air and Soil Pollution**, 216:289–317. 2011
- Belyazid, S., Kurz, D., Braun, S., Sverdrup, H., Rihm, B., Hettelingh, J.P. A dynamic modelling approach for estimating critical loads of nitrogen based on plant community changes under a changing climate. **Environmental Pollution** 159:789–801. 2011
- Belyazid, S., Phelan, J., Clark, C., Sverdrup, H., Nihlgård, B., Driscoll, C., Fernandez, I., Robin Dennis, R., Aherne, J. Assessing the effect of climate and air pollution on plant diversity and biogeochemistry in the Northeastern US broadleaf forests testing the ForSAFE-VEG model at three sites. In press **Water, Air and Soil Pollution**. 2015
- Belyazid, S., Kurz, D., Braun, S., Sverdrup, H., Rihm, B., Hettelingh, J.P. A dynamic modelling approach for estimating critical loads of nitrogen based on plant community changes under a changing climate. **Environmental Pollution** 159:789–801. 2011
- Belyazid, S., Bailey, S., Sverdrup, H. Past and Future Effects of Atmospheric Deposition on the Forest Ecosystem at the Hubbard Brook Experimental Forest: Simulations with the Dynamic Model ForSAFE In: *Modelling of Pollutants in Complex Environmental Systems*, Volume II: 357–377, Hanrahan, G. (Ed.) ILM Publications, International Labmate Limited. 2010
- Belyazid, S., Sverdrup, H., Akselsson, C., Kurz, D. Synergies and conflicts in addressing climate change and nitrogen deposition in terrestrial ecosystems. Proceedings from the Nitrogen 2011 Conference held at the Edinburgh International Conference Centre. 11–14 April 2011. Edited by M. Sutton. [http://www.nitrogen2011.org/oral\\_presentations/S17\\_2\\_Belyazid.pdf](http://www.nitrogen2011.org/oral_presentations/S17_2_Belyazid.pdf) 2011.
- Belyazid, S., Sverdrup, H.U., Kurz, D., Braun, S. Use of an integrated deterministic soil-vegetation model to assess impacts of atmospheric deposition and climate change on plant species diversity. In W. de Vries, J-P. Hettelingh, M. Posch (Eds) *Critical Loads and Dynamic Risk Assessments: Nitrogen, Acidity and Metals in Terrestrial and Aquatic Ecosystems*: 327–358. Springer Verlag. 2015.
- Belyazid, S., Phelan, J., Nihlgård, B., Sverdrup, H., Driscoll, C. Fernandez, I., Aherne, J., Teeling-Adams, L.M., Arsenault, M., Cleavitt, N., Engstrom, B., Dennis, R., Sperduto, S., Werier, D., Clark, C. Assessing the Effects of Climate Change and Air Pollution on Soil Properties and Plant Diversity in Northeastern U.S. hardwood forests: Model Setup and Evaluation. **Water, Air and Soil Pollution**. In review. 2019
- Bengtsson, Å. and Sjöberg, S., Surface complexation and proton-promoted dissolution in aqueous apatite systems. **Pure Appl. Chem.**, 81. 1569–1584, 2009.
- Berg, A. and Banwart, S.A. Carbon dioxide mediated dissolution of Ca-feldspar: implications for silicate weathering. **Chemical Geology** 163, 25–42. 2000
- Berg, A. and Banwart, A.S., Anorthite surface speciation and weathering reactivity in bicarbonate solutions at 25°C. Proceedings of the workshop “CO<sub>2</sub> Chemistry”, Hemavan, Sweden, Sept. 13–16, 1993. Proceedings of the English Royal Society of Chemistry. 1994
- Bibi, I., Singh, B., Silvester, E., Dissolution of phyllosilicates under saline acidic conditions. 19<sup>th</sup> World Congress of Soil Science, Soil Solutions for a Changing World, 1 – 6 August 2010, Brisbane, Australia. 4 pages. Published on DVD. 2010
- Bickmore, B.R., Nagy, K.L., Gray, A.K., Brinkerhoff, A.R. The effect of Al(OH)<sub>4</sub><sup>-</sup> on the dissolution rate of quartz. **Geochimica et Cosmochimica Acta**, 70, 290–305. 2006
- Binder, T., Vox, A., Belyazid, S., Haraldsson, H., Svensson, M. Developing system dynamics models from causal loop diagrams. 21 pp. <https://www.semanticscholar.org/https://pdfs.semanticscholar.org/cf00/b9084b05ba357bf0c5fa7a5b9cc1b5695015.pdf> 2003.
- Blake, R.E. and Walter, L.M. Effects of organic acids on the dissolution of orthoclase at 80°C and pH 6. **Chemical Geology** 132, 91–102. 1996
- Bobbink, R., Draaijers, G., Erismann, J.W., Gregor, H.D. (Ed). Henriksen, A., Hornung, M., Iversen, T., Kucera, V., Posch, M., Rihm, B., Spranger, T., Sverdrup, H., de Vries, W., Werner, B., (Ed) Manual on methodologies and criteria for mapping critical levels/loads and geographical areas where they are exceeded. **Umweltbundesamt Texte** 71:96, issn 0722-186X. 1996
- Bonten, L.T.C., Reinds, G.J., Groenenberg, J.E., de Vries, W., Posch, M. Evans, C.D. Belyazid, S., Braun, S., Moldan, F., Sverdrup, H.U. Kurz, D., Dynamic geochemical models to assess deposition impacts and target loads of acidity for soils and surface waters. In: W. de Vries, J-P. Hettelingh, M. Posch (Eds) *Critical Loads and Dynamic Risk Assessments: Nitrogen, Acidity and Metals in Terrestrial and Aquatic Ecosystems*: 225–251. Springer Verlag. 2015
- Bortoluzzi, E., Belyazid, S., Alard, D., Corcket, T., Gauquelin, T., Gégout, J.C., Nihlgård, B., Party, J.P., Sverdrup, H., Probst, A. Modélisation dynamique de l’impact des dépôts atmosphériques azotés sur la biodiversité forestière:

- évaluation des charges critiques. Session 28: Modélisation mécaniste: réponses aux perturbations environnementales, de l'individu à la population. In: (Eds.) Bertrand, J.C., Bonis, A., Caquet, T., Franc, A., Garnier, E., Olivieri, I., Thébaud, C., Roy, J. Proceedings of the Colloque Ecologie 2010 Montpellier 2-4 septembre 2010. A l'initiative des réseaux: AFEM - COMEVOL - ECOVEG - JEF - PPD - REID - SFE - TRAITS. 2010.
- Blum A.E. Feldspars in weathering. In Feldspars and their Reactions (ed. I. Parsons). Kluwer Academic, Dordrecht, Boston. 595–630. 1994
- Blum A.E. and Lasaga A.C. The role of surface speciation in the dissolution of albite. **Geochimica et Cosmochimica Acta** 55, 2193–2201. 1991
- Blum A.E. and Stillings L.L. Feldspar dissolution kinetics. **Reviews in Mineralogy** 31, 291–331. 1995
- Bossel, H. Earth at the crossroads. Paths to a sustainable future. Cambridge University Press, 387 pages. 1998.
- Brady P.V. and Walther J.V. Surface chemistry and silicate dissolution at elevated temperatures. **American Journal of Science** 292, 639. 1992
- Brady, P.V., Carroll, S.A., Direct effect of CO<sub>2</sub> and temperature on silicate weathering: possible implications for climate control. **Geochimica et Cosmochimica Acta** 58, 1853–1856. 1994.
- Brady, P.V., Gislason, S.R., 1997. Seafloor weathering controls or atmospheric CO<sub>2</sub> and global climate. **Geochimica et Cosmochimica Acta** 61, 965–973.
- Bray, A.W., Oelkers, E.H., Bonneville, S., Wolff-Boenisch, D., Potts, N.J., Fones, G., Benning, L.G. The effect of pH, grain size and organic ligands on biotite weathering rates. **Geochimica et Cosmochimica Acta** 164, 127–145. 2015
- Bray, A.W., Benning, L.G., Bonneville, S., Oelkers E.H., Biotite surface chemistry as a function of aqueous fluid composition. Biotite surface chemistry as a function of aqueous fluid composition **Geochimica et Cosmochimica Acta** 128, 58-70. 2013
- Brandt F., Bosbach, D., Krawczyk-Bärsch, R., Arnold, T., Bernhard, G. 2005. Chlorite dissolution in the acid pH range: A combined microscopic and macroscopic approach. **Geochimica et Cosmochimica Acta**, 67: 1451-1461. 10.1016/S0016-7037(02)01293-0.
- Brantley, S. Reaction kinetics of primary rock-forming minerals under ambient conditions. In: Treatise on Geochemistry, Volume 5. Editor: James I. Drever. Executive Editors: Heinrich D. Holland and Karl K. Turekian. ISBN 0-08-043751-6. Elsevier, 73-117. 2003
- Brantley, S. Chapter 5: Kinetics of mineral dissolution. 151-263. In: Kinetics of water-rock interaction. Edited by Brantley, S.L., Kubicki, J.D., White, A.F., Springer Verlag. ISBN 978-0-387-73562-7. 2008b
- Brantley S. L. Kinetics of Water–Rock Interaction. Springer. 2008.
- Brantley, S.L., Conrad, C.F. Analysis of Rates of Chemical Reactions, in Kinetics of Water-Rock Interaction, S.L. Brantley, J.D. Kubicki, & A.F. White (eds.), Springer, New York, Chapter 1, 1-37. 2008
- Brantley, S.L. Kinetics of Mineral Dissolution, in: Kinetics of Water-Rock Interaction. S.L. Brantley, J.D. Kubicki, & A.F. White (eds.), Springer, New York, Chapter 5, 151-210. 2008.
- Brantley S.L. and Chen Y. Chapter 4: Chemical weathering rates of pyroxenes and amphiboles. In Chemical Weathering Rates of Silicate Minerals (eds. A.F. White and S.L. Brantley). Mineralogical Society of America, Washington, DC, **Reviews in Mineralogy** 31, 119–172. 1995
- Brantley S.L., and Stillings L., An integrated model for feldspar dissolution under acid conditions. **Mineralogical Magazine** A 58, 117–118. 1994
- Brantley S.L. and Stillings L.L. Feldspar dissolution at 25°C and low pH. **American Journal of Science** 296, 101–127. 1996
- Braun, J., Mercier, J., Guillocheau, F., Robin, C., A simple model for regolith formation by chemical weathering. **Journal of Geophysical Research: Earth Surface** 121: 2140-217. 2016,
- Bricker, O., Paces, T., Johnson, C., Sverdrup, H., Weathering and erosion aspects of small catchment research. In: Cerny, J. (Ed.) *Biogeochemistry of small catchments*, 51:85–106. John Wiley and sons. 1996
- Burch, T.E., Nagy, K.L., Lasaga, A.C. Free energy dependence of albite dissolution kinetics at 80 °C and pH 8.8. **Chemical Geology** 105:137–162. 1993
- Cama J., Ganor J., Ayora C. and Lasaga A.C. Smectite dissolution kinetics at 80° and pH 8.8. **Geochimica et Cosmochimica Acta** 64, 2701–2717. 2000
- Carroll S.A. and Knauss K.G. Dependence of labradorite dissolution kinetics on CO<sub>2</sub>(aq), Al(aq) and temperature. Lawrence Livermore National Laboratory. Report from Technical Information Department's Digital Library <http://www.llnl.gov/tid/Library.html> 17 pp. 2001
- Carroll S.A. and Knauss K.G. Dependence of labradorite dissolution kinetics on CO<sub>2</sub>(aq), Al(aq) and temperature. **Chemical Geology** 217, 213–225. 2005
- Carroll, S.A. and Smith, S. Chlorite Dissolution Kinetics at Variable pH and Temperatures up to 275°C. Lawrence Livermore National Laboratory. LLNL-TR-644422. 12 pages. 2013.
- Carroll, S.A. and Walther, J.V. Kaolinite dissolution at 25, 60, and 80°C. **American Journal of Science**, 290, 797–810. 1990
- Casey W.H., Westrich H.R., Holdren G.R. Dissolution rates of plagioclase at pH = 2 and 3. **American Mineralogist** 76, 211–217. 1991
- Casey, W.H. and Sposito, G. On the temperature dependence of mineral dissolution rates. **Geochimica et Cosmochimica Acta**, 56, 3825–3830. 1992
- Casey, W.H., 1991. On the relative dissolution rates of some oxides and orthosilicate minerals. **J. Colloid Interface Science** 146, 586–589.
- Casey W.H. and Westrich, H.R. Control of dissolution rates of orthosilicate minerals by divalent metal-oxygen bonds. **Nature** 355: 157-159. 1992
- Casey, W.H., Westrich, H.R., Arnold, G.W., Surface chemistry of labradorite feldspar reacted with aqueous solutions at pH

- 2,3, and 12. **Geochimica et Cosmochimica Acta** 52: 2795-2807. 1988
- Casetou-Gustafson, S., Hillier, S., Akselsson, C., Simonsson, M., Stendahl, J., Olsson, B. Comparison of measured (XRPD) and modeled (A2M) soil mineralogies: A study of some Swedish forest soils in the context of weathering rate predictions. **Geoderma** 310: 77-88. 2018.
- Châirat, C., Schott, J., Oelkers, E.H., Lartigue, J-E., Harouiya, N. Kinetics and mechanism of natural fluorapatite dissolution at 25°C and pH from 3 to 12. **Geochimica et Cosmochimica Acta** 71:5901–5912. 2007
- Chen, Y., and Brantley, S.L. Dissolution of forsteritic olivine at 65°C and 2<pH < 5. **Chemical Geology** 165; 267–281. 2000
- Chen, Y., and Brantley, S.L. Temperature- and pH-dependence of albite dissolution rate at acid pH. **Chemical Geology** 135, 275-290. 1997.
- Chen, Y., and Brantley, S.L. Diopside and anthophyllite dissolution at 25° and 90°C and acid pH. **Chemical Geology** 147: 233–248, 1998
- Chin, P. K. F. and Mills, G. L.. Kinetics and Mechanisms of Kaolinite Dissolution - Effects of Organic-Ligands. **Chemical Geology** 90, 307-317. 1991
- Critelli, T., Marini, L., Schott, J., Mavromatis, V.M., Apollaro, C., Rinder, T., de Rosa, R., Oelkers, E.H. Dissolution rate of antigorite from a whole-rock experimental study of serpentinite dissolution from 2<pH<9 at 25°C: Implications for carbon mitigation via enhanced serpentinite weathering. **Applied Geochemistry** 61: 259–271. 2015
- Critelli, T., Marini, L., Schott, J., Mavromatis, V., Apollaro, C., Rinder, T., De Rosa, R., Oelkers, E.H. Dissolution rates of actinolite and chlorite from a whole-rock experimental study of metabasalt dissolution from pH 6-12 at 25°C. **Chemical Geology** 390, 100–108. 2014
- Cory, N., Laudon, H., Köhler, S., Seibert, J., Bishop, K. Evolution of soil solution aluminium during transport along a forested boreal hillslope. **J. Geophys Res-Biogeophys** 112(G3). Art. G0301410.1029/2006jg000387. 2007
- Cotton, A. Dissolution kinetics of clinoptilolite and heulandite in alkaline conditions. **Bioscience Horizons**, 1:38-44. 2008
- Crundwell, F.K., The dissolution and leaching of minerals: Mechanisms, myths and misunderstandings. **Hydrometallurgy** 139, 132–148. 2013.
- Crundwell, F.K., The mechanism of dissolution of minerals in acidic and alkaline solutions: Part I — A new theory of non-oxidation dissolution. **Hydrometallurgy** 149: 252-264. 2014a.
- Crundwell, F.K., The mechanism of dissolution of minerals in acidic and alkaline solutions: Part II — Application to silicates. **Hydrometallurgy** 149, 265–275. 2014b.
- Crundwell, F.K., The mechanism of dissolution of minerals in acidic and alkaline solutions: Part III — Application to oxides and sulfides. **Hydrometallurgy** 149, 71–81. 2014c.
- Crundwell, F.K., The mechanism of dissolution of forsterite, olivine and minerals of the orthosilicate group. **Hydrometallurgy** 150: 68–82. 2014d.
- Crundwell, F. K. The Mechanism of dissolution of the feldspars: Part I Dissolution at conditions far from equilibrium. **Hydrometallurgy** 151, 151–162. 2015a
- Crundwell, F. K. The Mechanism of dissolution of the feldspars: Part II Dissolution at conditions close to equilibrium. **Hydrometallurgy** 151, 163–171. 2015b
- Crundwell, F.K., The mechanism of dissolution of minerals in acidic and alkaline solutions: Part VI a molecular viewpoint. **Hydrometallurgy** 161, 34-44. 2016.
- Crundwell, F.K., On the mechanism of the dissolution of quartz and silica in aqueous solutions **ACS Omega**: 2:1116-1128. 2017.
- Cubillas, P., Köhler, S., Prieto, M., Châirat, C., Oelkers, E.H. Experimental determination of the dissolution rates of calcite, aragonite, and bivalves. **Chemical Geology** 216, 59-77
- Dambrinne, E., Sverdrup, H., Warfvinge, P. Atmospheric deposition; Forest management and soil nutrient availability; A modelling exercise. In: Bonneau M. Landmann, G., (Ed.), *Forest Decline and Acidification Effects in the French Mountains*, 259–269. Springer Verlag, Berlin. 1995
- Daval, D., Testemale, D., Recham, N., Tarascon, J.M., Siebert, J., Martinez, I., Guyot, F. Fayalite (Fe<sub>2</sub>SiO<sub>4</sub>) dissolution kinetics determined by X-ray absorption spectroscopy. **Chemical Geology** 275, 161–175. 2010a
- Daval, D., Hellmann, R., Corvisier, J., Tisserand, D., Martinez, I., Guyot, F. Dissolution kinetics of diopside as a function of solution saturation state: Macroscopic measurements and implications for modeling of geological storage of CO<sub>2</sub> **Geochimica et Cosmochimica Acta** 74: 2615–2633. 2010b
- Daval, D., Hellmann, R., Martinez, I., Gangloff, S., Guyot, F. Lizardite serpentine dissolution kinetics as a function of pH and temperature, including effects of elevated pCO<sub>2</sub>. **Chemical Geology** 351: 245–256. 2013
- Declercq, J., Bosc, O., Oelkers E.H., Do organic ligands affect forsterite dissolution rates? **Applied Geochemistry** 39, 69-77. 2013
- Declercq, J., Diedrich, T., Perrot, M., Gislason, S.R., Oelkers, E.H., . Experimental determination of rhyolitic glass dissolution rates at 40–200°C and 2< pH< 10.1 **Geochimica et Cosmochimica Acta** 100, 251-263 2013.
- Denbigh, K.: 1971, *The Principles of Chemical Equilibrium*, Cambridge University Press, Cambridge (U.K.).
- Devidal J.-L., Schott J., Dandurand J.-L. An experimental study of kaolinite dissolution and precipitation kinetics as a function of chemical affinity and solution composition at 150°C, 40 bars, and pH 2, 6.8, and 7.8. **Geochimica et Cosmochimica Acta** 61: 5165–5186. 1997
- Diedrich, T., Schott, J., Oelkers, E.H. An experimental study of tremolite dissolution rates as a function of pH and temperature: implications for tremolite toxicity and its use in carbon storage. **Mineralogical Magazine** 78: 1449–1464. 2014
- Dixit S. and Carroll S.A. Effect of solution saturation state and temperature on diopside dissolution. **Geochemical Transactions** 8. 2007
- Dixon J.L., and von Blanckenburg, F., Soils as pacemakers and limiters of global silicate weathering. **Comptes Rendus**



- Geoscience**, 344:597-609. 2012
- Dresel P.E. The dissolution kinetics of siderite and its effect on acid mine drainage. Ph.D. thesis. Pennsylvania State University. 1989
- Drewer, J., Murphy, K.M., Clow, D.W. Field weathering rates versus laboratory dissolution rates: an update. Goldschmidt conference Edinburgh 1994. 239-240. 1994
- Drever J.I., Poulson S.R., Stillings L.L., Sun Y. The effect of oxalate on the dissolution rate of quartz and plagioclase feldspars at 20–25°C. *Geochemistry of Crustal Fluids: Water/Rock Interaction during Natural Processes*, 39. 1996
- Drever, J.I. and Clow, D.W. Weathering rates in catchments. In A. F. White and S. L. Brantley, (Eds), *Chemical weathering rates of silicate minerals*. Mineralogical Society of America, Washington D. C. **Reviews in mineralogy** 31:463-483. 1995
- Drever, J.I. and Zobrist, J., Chemical weathering of silicate rocks as a function of elevation in the southern Swiss Alps. **Geochimica et Cosmochimica Acta**, 56:3209-3216. 1992
- Drever, J., and Stillings, L. The role of organic acids in mineral weathering, **Colloids Surf. A**, 120: 167–181. 1997,
- Drever, J.I., *The Geochemistry of Natural Waters*, Prentice Hall, Englewood Cliffs, N.J. 1988
- Drever, J.I., The effect of land plants on weathering rates of silicate minerals, **Geochimica et Cosmochimica Acta** 58, 2325–2332. 1994
- Dorozhkin, S. Dissolution mechanism of calcium apatite in acids: A review of literature. **World Journal of methodology** 26:1-17. 2012
- Dove, P.M., and Crerar, D.A. Kinetics of quartz dissolution in electrolyte solutions using a hydrothermal mixed flow reactor. **Geochim et Cosmochim Acta**, 54:955-969. 1990.
- Duan, L., Hao, J., Xie, S., Zhou, Z., Xuemei Ye. Determining weathering rates of soils in China. **Geoderma** 110, 205–225. 2002
- Duckworth, O.W., and Martin, S.T. Role of molecular oxygen in the dissolution of siderite and rhodochrosite. **Geochimica et Cosmochimica Acta**, 68, 607–621. 2003
- Duckworth, O.W. and Martin, S.T. Connections between surface complexation and geometric models of mineral dissolution investigated for rhodochrosite. **Geochim. Cosmochim. Acta** 67, 1787–1801. 2003
- Erlandson, M., Oelkers, E.H., Bishop, K., Sverdrup, H.U., Belyazid, S., Ledesma, J.L.J., Köhler, S.J., Spatial and temporal variations of base cation release from chemical weathering on a hillslope scale **Chemical Geology** 441, 21:1–13. 2016
- Erlandson, Sverdrup, H.U., M., Bishop, K., Belyazid, S., Ameli, A., Köhler, S.J., Catchment export of base cations: Improved mineral dissolution kinetics influence the role of water transit time (This issue) **Soil** 1-19. 2019.
- Fernandez-Bastero, S., Gil-Lozano, C., Briones, M.J.I., Gago-Duport, L. Kinetic and structural constraints during glauconite dissolution: implications for mineral disposal of CO<sub>2</sub> **Mineralogical Magazine** 72, 27–31. 2008
- Fischer, S., and Liebscher, E., Dissolution Kinetics of Iron Carbonate, Illite and Labradorite – CO<sub>2</sub>-Saline Fluid- mineral Experiments within the GaMin'11 Inter-laboratory Comparison Exercise. - **Energy Procedia**, 63, 5461-5466. A. 2014
- Finlay, R., Wallander, H., Smits, M.M., Holmström, S., van Hees, P., Lian, B., Rosling, A. The role of fungi in biogenic weathering in boreal forest soils. **Fungal Biology Review** 23: 101-106. 2010
- Flaathen, K., Gislason, S.R., Oelkers, E.H. The effect of aqueous sulphate on basaltic glass dissolution rates. *Chemical Geology* 277, 345-354. 2010
- Forrester, J. W. *Industrial Dynamics*. Pegasus Communications. ISBN 1-883823-36-6. 1961.
- Forrester, J. W. *Urban Dynamics*. Pegasus Communications. ISBN 1-883823-39-0. 1969.
- Forrester, J., *World dynamics*. Pegasus Communications, Waltham MA. 1971.
- Forsius, M., Alveteg, M., Jenkins, A., Johansson, M., Kleemola, S., Lükewille, A., Posch, M. Sverdrup. H. MAGIC, SAFE and SMART model application at integrated monitoring sites: Effects of emission reduction scenarios. **Water, Air and Soil Pollution** 195:2–30. 1998.
- Fouda, M.F.R., Amin, R.E.-S., Abd-Elzaher, M.M. Extraction of magnesia from Egyptian serpentine ore via reaction with different acids. I. Reaction with sulfuric acid. **Bull. Chem. Soc. Jpn**, 1907–1912. 1996a.
- Fouda, M.F.R., Amin, R.E.-S., Abd-Elzaher, M.M. Extraction of magnesia from Egyptian serpentine ore via reaction with differ- ent acids. II. Reaction with nitric and acetic acids. **Bull. Chem. Soc. Jpn**, 69, 1913–1916. 1996b.
- Frognier, P and Schweda, P. Hornblende dissolution kinetics at 25°C. **Chemical Geology** 151, 169–179. 1998.
- Fu, Q., Lu, P., Konishi, H., Dilmore, R., Xu, H., Seyfried, W.E. Jr, Zhu, C. Coupled alkali feldspar dissolution and secondary mineral precipitation in batch systems: 1. New experiments at 200 °C and 300 bars **Chemical Geology** 258, 125-135 2009
- Fumuto, T., Shindo, J., Oura, N., Sverdrup, H. Adapting the PROFILE model to calculate the critical loads for East Asian soils by including volcanic glass weathering and alternative aluminium solubility system. **Water, Air and Soil Pollution** 130:1247-1252. 2001
- Gahrke, T., Pina P.S., Cornell, R.M., Dissolution kinetics of montmorillonite in hydrochloric and oxalic acid. **Journal of the American Society** 114, 102 – 112. 2005.
- Galeczka, I., Wolff-Boenisch, D., Oelkers, E.H., Gislason, S.R., An experimental study of basaltic glass–H<sub>2</sub>O–CO<sub>2</sub> interaction at 22 and 50°C: implications for subsurface storage of CO<sub>2</sub>. **Geochimica et Cosmochimica Acta** 126, 123-145. 2014
- Ganor, J., Roueff, E., Erel, Y., Blum, J. The dissolution kinetics of a granite and its minerals – implications for comparison between laboratory and field dissolution rates. **Geochimica et Cosmochimica Acta** 69, 2043-2056. 2005
- Ganor, J., Lu, P., Zheng, Z., Zhu, C. Bridging the gap between laboratory measurements and field estimations of weathering using simple calculations. **Environ Geol** 53:599–610. 2007
- Gainey, S.R., Hausrath, E.M., Hurowitz, J.A., Milliken, R.E., Nontronite dissolution rates and implications for Mars.

- Geochimica et Cosmochimica Acta** 126: 192–211. 2014.
- Gautier, J. M., Oelkers, E. and Schott, J., Experimental study of K-feldspar dissolution rate as a function of chemical affinity at 150°C and pH 9, **Geochimica et Cosmochimica Acta** 58, 4549–4560. 1994
- Gaudio, N., Belyazid, S., Gendre, X., Mansat, A., Nicolas, M., Rizzetto, S., Sverdrup, H., Probst, A. Combined effect of atmospheric nitrogen deposition and climate change on temperate forest soil biogeochemistry: a modeling approach. **Ecological Modelling** 30. 624–634. 2015.
- Gautelier, M., Oelkers, E.H., Schott, J., An experimental study of dolomite dissolution rates as a function of pH from 0.5 to 5 and temperature from 25 to 80°C. **Chemical Geology** 157, 13–26, 1999
- Gislason S.R. and Hans P.E. Meteoric water-basalt interactions. I: A laboratory study. **Geochimica et Cosmochimica Acta** 51, 2827–2840. 1987
- Gislason, S.R., Oelkers, E.H. Mechanism, rates, and consequences of basaltic glass dissolution: II. An experimental study of the dissolution rates of basaltic glass as a function of pH and temperature. **Geochimica et Cosmochimica Acta** 67, 3817–3832. 2003
- Gislason, S.R., Arnorsson, S., Armannsson, H., Chemical weathering of basalt in southwest Iceland: effects of runoff, age of rocks and vegetative/glacial cover. **American Journal of Science** 296, 837 – 907. 1996.
- Glover, E., Faanu, A., Fianko, J.R. Dissolution Kinetics of Stilbite at Various Temperatures under Alkaline Conditions. **West African Journal of Applied Ecology**, 16: 95–105. 2010
- Godderis, Y., Francois, L.M., Probst, A., Schott, J., Moncoulon, D., Labat, D., Viville, Didier. Modelling weathering processes at the catchment scale: The WITCH numerical model. **Geochimica et Cosmochimica Acta**, 70, 1128–1147. 2006
- Golubev, S.V., Pokrovsky, O.S., Schott, J. Laboratory weathering of Ca- and Mg-bearing silicates: weak effect of CO<sub>2</sub> and organic ligands. **Geochimica et Cosmochimica Acta**, A418. 2004.
- Golubev S. V., Pokrovsky O. S. and Schott J. 2005 Experimental determination of the effect of dissolved CO<sub>2</sub> on the dissolution kinetics of Mg and Ca silicates at 25°C. **Chemical Geology** 217, 227– 238.
- Guidry M.W. and Mackenzie F.T. Experimental study of igneous and sedimentary apatite dissolution: control of pH, distance from equilibrium, and temperature on dissolution rates. **Geochimica et Cosmochimica Acta** 67, 2949–2963. 2003
- Goyne, K.W., Brantley, S.L., Chorover, J. Effects of organic acids and dissolved oxygen on apatite and chalcopyrite dissolution: Implications for using elements as organomarkers and oxymarkers. **Chemical Geology** 234:28–45. 2006
- Gudbrandsson, S., Wolff-Boenisch, D., Gislason, S.R., Oelkers, E.H. An experimental study of crystalline basalt dissolution from 2<pH<11 and temperatures from 5 to 75°C. **Geochimica et Cosmochimica Acta** 75, 5496–5509. 2011
- Gudbrandsson, S., Wolff-Boenisch, D., Gislason, S.R., Oelkers, E.H. Experimental determination of plagioclase dissolution rates as a function of its composition and pH at 22°C. **Geochimica et Cosmochimica Acta** 139:154–172. 2014
- Guidry, M.W., and Mackenzie, F.T. Experimental Study of Igneous and Sedimentary Apatite Dissolution: Control of pH, Distance from Equilibrium, and Temperature on Dissolution Rates.. **Geochimica et Cosmochimica Acta**, 67, 2949–2963. 2003
- Gustafsson A.B., Puigdomenech. I.. The effect of pH on chlorite dissolution rates at 25°C. **Materials Res Soc Symp Proc**, 757:649–655. 2003
- Hamilton J.P., Pantano C.G., Brantley S.L. Dissolution of albite glass and crystal. **Geochimica et Cosmochimica Acta** 64, 2603–2615. 2000
- Hamilton, J.P., Brantley, S.L., Pantano, C.G., Criscenti, L.J., Kubicki, J.D., Dissolution of nepheline, jadeite, and albite glasses: towards better models for aluminosilicate dissolution. **Geochimica et Cosmochimica Acta** 65, 3683–3702. 2001.
- Hangx, S.J. and Spiers, C.J. Reaction of plagioclase feldspars with CO<sub>2</sub> under hydrothermal conditions. **Chemical Geology** 265, 88–98. 2009
- Hansley, P.L., and Briggs, P.H., Garnet Dissolution in Oxalic Acid-A Possible Analog for Natural Etching of Garnet by Dissolved Organic Matter. U.S. Geological Survey Bulletin 2106. United States Government Printing Office, Washington: 1994
- Haraldsson, H., Sverdrup, H., Belyazid, S., Sigurdsson, B., Halldorsson, G. Assessment of effects of afforestation on soil properties in Iceland, using systems analysis and system dynamics methods. **Icelandic Agricultural Science** 20:107–123. 2007
- Haraldsson, H. 2004 Introduction to systems thinking and causal loop diagrams. Reports in Ecology and Environmental Engineering 1:2004, 5th edition. Lund University, Lund, Sweden.
- Haraldsson H. and Sverdrup, H., 2005, On aspects of systems analysis and dynamics workflow. Proceedings of the systems dynamics society, July 17–21, 2005 International Conference on systems dynamics, Boston, USA. 1–10 pages. <http://www.systemdynamics.org/conferences/2005/proceed/papers/HARAL310.pdf>
- Harouiya, N., Chaïrat, C., Köhler, S.J., Gout, R., Oelkers, E.H. The dissolution kinetics and apparent solubility of natural apatite in closed reactors at temperatures from 5 to 50°C and pH from 1 to 6. **Chemical Geology** 244: 554–568. 2007
- Harouiya, N. and Oelkers, E.H. An experimental study of the effect of aqueous fluoride on quartz and alkali-feldspar dissolution rates. **Chemical Geology** 205, 155–167. 2004
- Haug, T.A., Kleiv, R.A., Munz, I.A., Investigating dissolution of mechanically activated olivine for carbonation purposes. **Applied Geochemistry** 25, 1547–1563. 2010.
- Hausrath, E.M., A. Neaman, S.L. Brantley. Elemental release rates from dissolving basalt and granite with and without organic ligands. **American Journal of Science** 309, 633–660. 2009.
- Hayashi, H., and Yamada, M. Kinetics of dissolution of non-crystalline oxides and crystalline clay minerals in a basic ion solution. **Clay and Clay Minerals** 38:308–3114. 1990
- van der Heijden, G., Belyazid, S. LU ; Dambrine, E.; Ranger, Jacques and Legout, A. NutsFor a process-oriented model to

- simulate nutrient and isotope tracer cycling in forest ecosystems **Environmental Modelling and Software** 9:365-380. 2017
- Helgeson, H., Murphy, W., Aagaard, P.: Thermodynamics and kinetic constraints on reaction rates among minerals and aqueous solutions: II. Rate constants, effective surface area and the hydrolysis of feldspar. **Geochimica et Cosmochimica Acta** 48, 2405-2432. 1984,
- Hellmann, R., Daval, D., Tisserand, D., Renard, F. Albite feldspar dissolution kinetics as a function of the Gibbs free energy at high pCO<sub>2</sub>. In *Water Rock Interaction* (Bullen, T.D., Wang, Y., eds.), Taylor & Francis, London, 591-595. 2007
- Hellmann, R. and Tisserand, D. Dissolution kinetics as a function of the Gibbs free energy of reaction: An experimental study based on albite feldspar. **Geochimica et Cosmochimica Acta** 70: 364-383. 2006
- Hellmann, R., Daval, D., Tisserand, D. The dependence of albite feldspar dissolution kinetics on fluid saturation state at acid and basic pH: Progress towards a universal relation. **Geoscience** 342: 676–684. 2010
- Hettelingh, J.P., Posch, M., de Vries, W., Bull, K., Sverdrup, H. Guidelines for the computation and mapping of nitrogen critical loads and exceedance in Europe. In: Grennfelt, P.-I. and Löfblad, G. (Eds) *Critical Loads for Nitrogen — A workshop report*: 287–303. Nordic Council of Ministers. 1992
- Hettelingh, J.P., Chadwick, M., Sverdrup, H., Zhou, D. Assessment of environmental effects of acid deposition. In: *RAINS-ASIA; An assessment model for air pollution in Asia*. W. Foell, M. Ammann, G. Carmichael, M. Chadwick, J. P. Hettelingh, L. Hordijk, D. Zhou (eds). Chapter V:1-59, World Bank. 1995
- Hettelingh, J.P., Sverdrup, H., Zhao, D. Deriving critical loads for Asia. **Water, Air and Soil Pollution** 85:2565-2570. 1996
- Hettelingh, J.P., Sverdrup, H., Zhao, D. Assessment of environmental effects of acidic deposition in Asia. **Water, Air, and Soil Pollution** 85:1-24. 1996.
- Hilley, G.E., Chamberlain, C.P., Moon, S., Porder, S., Willet, S.D., Competition between erosion and reaction kinetics in controlling silicate-weathering rates. **Earth and Planetary Science Letters** 293: 191-199. 2010.
- Holmqvist, J., Ögaard, A., Öborn, I., Edwards, T., Mattson, L., Sverdrup, H. Estimating potassium release from weathering in Northern European agricultural systems using PROFILE and long term experiments **European Journal of Agronomy** 20:149-163. 2003
- Holmqvist, J., Thelin, G., Rosengren U., Stjernquist, I., Svensson, M., Wallman, P., Sverdrup, H. Assessing sustainability in the Asa research park In: *Developing principles for sustainable forestry Results from a research program in southern Sweden*. Sverdrup, H., and Stjernquist, I., (Eds.) **Managing Forest Ecosystems** 5:381-426. Kluwer Academic Publishers, Amsterdam. 2002
- Holmqvist, J. and Sverdrup, H. Vittringskartor ger uthålligare skogsbruk. **Skog och Forskning** 4/2001;25-27. 2001
- Holmqvist, J., Sverdrup, H., Petersson, P., Örlander G. Vittringens betydelse för uthållig produktion. In: Olsson, K. (Ed.). *Sustainable Forestry in Southern Sweden*, Årsrapport 1999; Tema Skogsmarkens långsiktiga produktionsförmåga 18-21. 1999
- Hodson, M.E. Does reactive surface area depend on grain size? Results from pH 3, 25 °C far-from-equilibrium flow-through experiments on anorthite and biotite. **Geochimica et Cosmochimica Acta** 70, 1655–1667. 2006a
- Hodson M. Searching for the perfect surface area normalizing term – a comparison of BET surface area-, geometric surface area-and mass-normalized dissolution rates of anorthite and biotite. **J. Geochem. Explor.** 88, 288–291. 2006b
- Hodson M.E. The influence of Fe-rich coatings on the dissolution of anorthite at pH 2.6. **Geochimica et Cosmochimica Acta** 67, 3355–3363. 2003
- Hodson, M. and Langan, S.J. 1999b. Considerations of uncertainty in setting critical loads of acidity of soils: the role of weathering rate determination. **Environmental Pollution** 106: 73–81.
- Hodson, M.E., Langan, S.J., Wilson, M.J. A sensitivity analysis of the PROFILE model in relation to the calculation of soil weathering rates. **Applied Geochemistry** 11: 835–844. 1996.
- Hodson, M.E., Langan, S.J. and Wilson, M.J. A critical evaluation of the use of the PROFILE model in calculating mineral weathering rates. **Water Air and Soil Pollution** 98: 79–104. 1997
- Houle, D., Lamoureux, P., Belanger, N., Bouchard, M., Gagnon, C., Couture, S., Bouffard, A., Soil weathering rates in 21 catchments of the Canadian Shield. **Hydrol. Earth Syst. Sci.**, 16, 685-697. 2012.
- Hänchen, M., Prigobbe V., Storti G., Seward T.M., Mazzotti M. Dissolution kinetics of forsteritic olivine at 90–150°C. **Geochimica et Cosmochimica Acta** 70, 4403–4416. 2006
- Huertas, F.J., Caballero, E., de Cisneros, C.J., Huertas, F., Linares, J. Kinetics of montmorillonite dissolution in granitic solutions. **Applied Geochemistry** 16, 397-407. 2001
- Huertas, F.J., Chou, L., Wollast, R. Mechanism of kaolinite dissolution at room temperature and pressure. Part II: kinetic study. **Geochimica et Cosmochimica Acta** 63, 3261– 3275. 1999
- Hultberg, H., Hultengren, S., Grennfelt, P., Oskarsson, H., Kalén, C., Pleijel, H.: Air pollution, environment and future. 30 years of research on forest, soils and water. Gårdsjöstiftelsen and Naturcentrum AB. 60pp. 2007.
- Jin, L., Andrews, D.M., Holmes, G.H., Lin, H., Brantley, S.L. Opening the "black box": water chemistry reveals hydrological controls on weathering in the Susquehanna Shale Hills Critical Zone Observatory. **Vadose Zone Journal** 10:928-942. 2011
- Johnson, N.C., Thomas, B., Maher, K., Rosenbauer, R.J., Bird, D., Brown, J., Olivine dissolution and carbonation under conditions relevant for in situ carbon storage. **Chemical Geology** 373, 93–105. 2014.
- Johnsson, P.A., Blum, A.E., Hochella, M.F.Jr., Parks, G.A., Sposito, G. Direct observation of muscovite basal-plane dissolution and secondary-phase formation: An XPS, LEED, and SFM study. In *Water–Rock Interaction VII* (eds. G. Areyhardt and R. Hurlston),. 159–162. Balkema. 1992
- Jönsson, C., Warfvinge, P., Sverdrup, H. Uncertainty in prediction of weathering rate and environmental stress factors with the PROFILE model. **Water, Air and Soil Pollution**, 81:1–23. 1995
- Jönsson, C., Warfvinge, P., Sverdrup, H. The SAFE model applied to the Solling data set. **Ecological Modelling**, 83:85–96, 1995



- Jonckbloedt, R.C.L., Olivine dissolution in sulphuric acid at elevated temperatures-implications for the olivine process, an alternative waste acid neutralizing process. **Journal of Geochemical Exploration** 62, 337–346. 1998.
- Kalinowski, B.E., Dissolution Kinetics and Alteration Products of Micas and Epidote in Acidic Solutions at Room Temperature, PhD Thesis. Stockholm University, Stockholm, 1997
- Kalinowski, B., Faith-Ell, C., Schweda, P. Dissolution kinetics and alteration of epidote in acidic solutions at 25°C. **Chemical Geology**. 151, 181–197. 1998
- Kalinowski, B.E. and Schweda, P. Kinetics of muscovite, phlogopite, and biotite dissolution and alteration at pH 1-4, room temperature. **Geochimica et Cosmochimica Acta**, 60, 367-385. 1995
- Kegan, R., Laskow-Lahey, L., The real reason people won't change. **Harvard Business Review** – OnPoint 103-111. Originally published in Harvard Business review November 2001. 2014.
- Kim, D.H., Toolbox: Guidelines for Drawing Causal Loop Diagrams, The Systems Thinker, 3; 5–6. 1992.
- Knauss, K. G., Nguyen S. N., Weed H. C. Diopside dissolution kinetics as a function of pH, CO<sub>2</sub>, temperature, and time. **Geochimica et Cosmochimica Acta** 57, 285–294. 1993
- Knutson, G., Bergström, S., Danielsson, L., Jacks, G., Lundin, L., Maxe, L., Sanden, P., Sverdrup, H., Warfvinge, P. Acidification of groundwater in forested till areas. **Ecological Bulletins**, 44:271–300. 1995
- Kolka, R.K.; Grigal, D.F.; Nater, E.A. Forest soil mineral weathering rates: use of multiple approaches. **Geoderma**. Vol. 73: 1-21. 1996
- Köhler, S.J., Bosbach, D., Oelkers E.H. Do clay mineral dissolution rates reach steady state? **Geochimica et Cosmochimica Acta** 69, 1997–2006. 2005
- Köhler, S.J., Dufaud, F., Oelkers E.H. An experimental study of illite dissolution kinetics as a function of pH from 1.4 to 12.2 and temperature from 5 to 50°C. **Geochimica et Cosmochimica Acta** 67: 3583–3594. 2003
- Kurz, D., Rihm, B., Sverdrup, H., Warfvinge, P. Critical loads of acidity for forest soils: Regionalized PROFILE model. *Environmental documentation* no. 88. 1-117, Swiss Agency for the Environment, Forest and Landscape, Swiss Government, Bern. 1998a
- Kurz, D., Alveteg, M., Sverdrup, H. Acidification of Swiss forest soils; Development of a regional dynamic assessment: Regionalized PROFILE model. *Environmental documentation* no. 89. 1-115 Swiss Agency for the Environment, Forest and Landscape, Swiss Government, Bern. 1998b
- Kurz, D., Rihm, B., Alveteg, M., Sverdrup, H. Steady-state and dynamic assessment of forest soil acidification in Switzerland. **Water, Air and Soil Pollution** 130: 1217-1222. 2001
- Kuwahara, Y., In situ observations of muscovite dissolution under alkaline conditions at 25–50°C by AFM with an air/fluid heater system **American Mineralogist**, 93: 1028–1033, 2008
- Kuwahara, Y., In-situ, real time AFM study of smectite dissolution under high pH conditions at 25–50°C. **Clay science**, 12, supplement 2, 57–62. 2006a
- Kuwahara, Y., In-situ AFM study of smectite dissolution under alkaline conditions at room temperature. **American Mineralogist**, 91, 1142–1149. 2006b
- Labat, D. and Viville, D. Modelling weathering processes at the catchment scale: the WITCH numerical model. **Geochimica et Cosmochimica Acta** 70, 1128–1147. 2006
- Lagache, M. Contribution à l'étude de l'altération des feldspaths, dans l'eau, entre 100 et 200°C, sous diverses pressions de CO<sub>2</sub>, et application à la synthèse des minéraux argileux. **Bull. Soc. franç. Minér. Crist.** 88: 223- 253. 1965
- Lagache, M.: New data on the kinetics of the dissolution of the alkali feldspar at 200°C in CO<sub>2</sub> charged water, **Geochimica et Cosmochimica Acta** 40, 157-161. 1976,
- Lammers, K., Smith, M.M., Carrol, S.A., Muscovite dissolution kinetics as a function of pH at elevated temperature. **Chemical Geology** 466: 149-158. 2017.
- Langan, S.L., Reynolds, B., Bain, D.C. The calculation of base cation release from mineral weathering in soils derived from Palaeozoic greywackes and shales in upland UK. **Geoderma** 69, 275-285. 1996a.
- Langan, S.L., Sverdrup, H., Cull, M. Calculation of base cation release from the chemical weathering of Scottish soils using the PROFILE model. **Water, Air and Soil Pollution** 85:2487-2502. 1996b.
- Lartigue, J.E., 1994. Contribution à l'étude de l'altération des silicates. Approche expérimentale en milieu ouvert de la cinétique de dissolution à 25°C d'un pyroxène (Ca–Mg–Fe) en fonction du pH. These. Université de droit, d'économie et des sciences d'Aix-Marseille.
- Lasaga, A.C. Fundamental approaches in describing mineral dissolution and precipitation rates. In: White, A.F., Brantley, S.L. (Eds.), Chemical Weathering Rates of Silicate Minerals, 31. Mineralogical Society of America, Washington, D.C., USA. **Reviews in Mineralogy** 31: 23–86. 1995
- Lasaga, A.C. Kinetic Theory in the Earth Sciences. Princeton University Press, Princeton, USA, 811pp. 1998
- Lazaro, A, Benac-Vegas, Brouwers, H.J.H., Geus, J.W., Bastida, J. The kinetics of the olivine dissolution under the extreme conditions of nano-silica production. **Applied Geochemistry** 52:1-15. 2015
- Laudon, H., Taberman, I., Ågren, A., Futter, M., Ottosson-Löfvenius M., Bishop, K. The Krycklan Catchment Study-A flagship infrastructure for hydrology, biogeochemistry, and climate research in the boreal landscape. **Water Resoures Research** 49, 7154-7158. 2013
- Leith, F.I., Dinsmore, K.J., Wallin, M.B., Billett, M.F., Heal, K.V., Laudon, H., Öquist, M.G., Bishop, K. Carbon dioxide transport across the hillslope-riparian-stream continuum in a boreal headwater catchment. **Biogeosciences** 12, 1881-1892. 2015.
- Lowson, R.T., Comarmond M.C.J., Rajaratnam G., Brown P.L. The kinetics of the dissolution of chlorite as a function of pH and at 25°C. **Geochimica et Cosmochimica Acta** 69, 1687–1699. 2005
- Lowson, R.T., Brown, P.L., Comamond, M.C.J, Rajataratnam, G. The kinetics of chlorite dissolution. **Geochimica et Cosmochimica Acta** 71: 1431–1447. 2007
- Lu, P., Fu, Q., Seyfried, W.E. Jr, Hedges, S.W., Soong, Y., Jones, K., Zhu, C. Coupled alkali feldspar dissolution and

- secondary mineral precipitation in batch systems: 2. New experiments with supercritical CO<sub>2</sub> and implications for carbon sequestration. **Applied Geochemistry** 30:75–90 2013
- Lu, P., Konishi, H., Oelkers, E., Zhu, C. Coupled alkali feldspar dissolution and secondary mineral precipitation in batch systems: 5. Results of K-feldspar hydrolysis experiments **Chinese Journal of Geochemistry** 34:1–12. 2015
- Ludwig, C., Casey, W.H., Rock, P.A., Prediction of ligand-promoted dissolution rates from the reactivities of aqueous complexes. **Nature** 375, 44–46. 1995.
- Lüttge, A., Bolton, E.W., Lasaga, A.C. An interferometric study of the dissolution kinetics of anorthite: the role of reactive surface area. **American Journal of Science** 299, 652–678. 1999
- Lång, L.O., Mineral Weathering Rates and Primary Mineral Depletion in Forest Soils, SW Sweden. In: Effects of Acid Deposition and Tropospheric Ozone on Forest Ecosystems in Sweden **Ecological Bulletins** 44: 100-113. 1995
- Maher, K. The dependence of chemical weathering rates on fluid residence time. **Earth and Planetary Science Letters**. 294:101-110. 2010
- Malek, S., Martinsson, L., Sverdrup, H. Modelling future soil chemistry at a highly polluted forest site at Istebna in Southern Poland, using the SAFE model. **Environmental Pollution** 137:568-573. 2005,
- Malek, S., Belyazid, S., Sverdrup, H. Modelling changes in forest soil chemistry in the oldest spruce stands in the Potok Dupnianski catchment in Southern Poland using the ForSAFE model. **Folia Forestalia Polonica**, Series A, 54:209-214. 2012
- Malmström, M. and Banwart, S. Biotite dissolution at 25°C: The pH dependence of dissolution rate and stoichiometry. **Geochimica et Cosmochimica Acta**, 61, 2779-2799, 1997
- Malmström, M., Banwart, S., Lewenhagen, J., Duro, L., Bruno, J. The dissolution of biotite and chlorite at 25°C in the near-neutral pH region. **Journal of Contaminant Hydrology** 21: 201-213. 1996
- Martinsson, L., Alveteg, M., Kronnäs, V., Sverdrup, H., Westling, O., Warfvinge, P. A regional perspective on present and future soil chemistry at 16 Swedish forest sites. **Water, Air, and Soil Pollution** 162: 89–105, 2005.
- Mast, M.A., and Drever, J.L., The effect of oxalate on the dissolution rates of oligoclase and tremolite: **Geochimica et Cosmochimica Acta**, 51, 2559-2568. 1987,
- Maurice, P.A., Mcknight, D.M., Leff, L., Fulghum, J.E., Michael Gooseff, M.. Direct observations of aluminosilicate weathering in the hyporheic zone of an Antarctic Dry Valley stream. **Geochimica et Cosmochimica Acta**, 66, 1335–1347, 2002
- Mazer, J.J. and Walther, J.V. Dissolution kinetics of silica glass as a function of pH between 40 and 85°C. **Journal of Non-crystalline Solids** 170:32–45. 1994
- McCourt, G.H. and Hendershot, W.H. 1992. A new method for determining mineral weathering rates in soils. **Commun. Soil Sci. Plant Anal.** 23: 939–952.
- McDonnell T.C., Belyazid S., Sullivan, T.J., Bell, M., Clark, C., Blett, T., Evans, T., Cass, W., Hyduke, A. Sverdrup, H., Vegetation dynamics associated with changes in atmospheric nitrogen deposition and climate in hardwood forests of Shenandoah and Great Smoky Mountains National Parks, USA. **Environmental Pollution** 237: 662-674. 2018.
- McDonnell T.C., S. Belyazid, T.J. Sullivan, H. Sverdrup, W.D. Bowman, E.M. Porter. Modeled subalpine plant community response to climate change and atmospheric nitrogen deposition in Rocky Mountain National Park, USA. **Environmental Pollution** 187:55-64. 2014
- Meadows, D.L., Meadows, D.H., Eds.; Business and Economics: Geneva, Switzerland. 1973
- Meadows, D.H., Meadows, D.L., Randers, J., Behrens, W. Limits to growth. Universe Books, New York 1972
- Meadows, D.L., Behrens III, W.W., Meadows, D.H., Naill, R.F., Randers, J., Zahn, E.K.O.. Dynamics of Growth in a Finite World. Massachusetts: Wright-Allen Press, Inc. 1974
- Meadows, D.H., Meadows, D.L., Randers, J. Beyond the limits: Confronting global collapse, envisioning a sustainable future. Chelsea Green Publishing Company: 1992
- Meadows, D. H., Randers, J., Meadows, D. Limits to growth. The 30 year update. Universe Press, New York. 2005
- Melegy, A., and Paces, T., Calculating Geochemical Weathering Rates Of Three Different Catchments In The Czech Republic. **International Journal of Innovations in Engineering and Technology (IJJET)** ISSN: 2319-1058. 2017.
- Metz, V., Raanan, H., Pieper, H., Bosbach, D., Ganor, J. Towards the establishment of a reliable proxy for the reactive surface area of smectite. **Geochimica et Cosmochimica Acta** 69, 2581– 2591. 2005
- Meyer, N.A. An investigation into the dissolution of pyroxene: A precursor to mineral carbonation of PGM tailings in South Africa. A thesis submitted for the degree of MSc in Engineering in Chemical Engineering at the University of Cape Town, South Africa. 2014
- Modin-Edman, A.K., Öborn, I., Sverdrup, H. FARMFLOW–A Dynamic Model for Phosphorus Mass Flow, Simulating Conventional and Organic Management of a Swedish Dairy Farm Agricultural Systems. **Agricultural systems** 94:431-444. 2007
- Mongeon, A., Aherne, J., Watmough, S. Weathering rates and steady-state critical loads for forest soils in the Georgia Basin. Proceedings. 9 pages. [http://depts.washington.edu/uwconf/2007psgb/2007proceedings/papers/11d\\_mongee.pdf](http://depts.washington.edu/uwconf/2007psgb/2007proceedings/papers/11d_mongee.pdf) 2007
- Montagnac, P., Kohler, S.J., Dufaud, F., Oelkers, E.H., An experimental study of the, dissolution stoichiometry and rates of a natural monazite as a function of temperature from 5 to 50 degrees C and pH from 1 to 12.3. **Geochimica Et Cosmochimica Acta** 66 (15A), A311-A311. 2002
- Mulders, J.J.P.A., Harrison, A.L., Christ, J., Oelkers, E.H. Non-stoichiometric dissolution of sepiolite, **Energy Procedia** 146, 74-80. 2018
- Murakami, T., Kogure, T., Kadohara, H., Ohnuki, T. Formation of secondary minerals and its effect on anorthite dissolution. **American Mineralogist** 83, 1209–1219. 1998
- Murphy, W.M., Pabalan, R.T., Prikryl, J.D., Goulet C.J. Dissolution rate and solubility of analcime at 25°C. Water–Rock Interact. Proceedings, 7, 107–110. 1992
- Murphy, W.M., Pabalan, R.T., Prikryl, J.D., Goulet, C.J. Reaction kinetics and thermodynamics of aqueous dissolution and

- growth of analcime and Na-clinoptilolite at 25°C. **American Journal of Science** 296, 128-86. 1996
- Murphy, S.F., Brantley, S.L., Blum, A.E., White, A.F., Dong, H. Chemical weathering in a tropical watershed, Luquillo Mountains, Puerto Rico, II: Rate and mechanism of biotite weathering. **Geochimica et Cosmochimica Acta** 62, 227-243 1998
- Murphy, W.M. and Helgeson, H.C.: Thermodynamic and kinetic constraints on reaction rates among minerals and aqueous solutions. III. Activated complexes and the pH-dependence of the rates of feldspar, pyroxene, wollastonite and olivine hydrolysis, **Geochimica et Cosmochimica Acta** 51, 3117-3153. 1987,
- Murphy, W.M., Oelkers, E.H., Lichtner, P.C. Surface reaction versus diffusion control of mineral dissolution and growth rates in geochemical processes. **Chemical Geology** 78, 357-380
- Nagy, K.L. Dissolution and precipitation kinetics of sheet silicates. In: Chemical Weathering Rates of Silicate Minerals (Eds.: A. F. White and S. L. Brantley). Mineralogical Society of America, Washington, DC, **Reviews in Mineralogy** 31, 173-225. 1995
- Nagy, K.L. and Lasaga, A. C. Dissolution and precipitation kinetics of gibbsite at 80°C and pH 3: The dependence on solution saturation state. **Geochimica et Cosmochimica Acta** 56: 3093-3111. 1992
- Nagy, K.L., Blum, A.E., Lasaga, A.C. Dissolution and precipitation kinetics of kaolinite at 80°C and pH 3: the dependence on solution saturation state. **American Journal of Science**, 291, 649-686. 1991
- Navarre-Sitchler, A. and Thyne, G. Effects of carbon dioxide on mineral weathering rates at earth surface conditions. **Chemical Geology** 243: 53-63. 2007
- Nesbitt, H.W., Macrae N.D., Shotyk W. Congruent and incongruent dissolution of labradorite in dilute acidic salt solutions. **Journal of Geology** 99, 429-442. 1991
- Nordstrom, D.K., Plummer, L.N., Langmuir, D., Busenberg, E., May, H.M., Jones, B.F., Parkhurst, D.L., Revised chemical equilibrium data for major water-mineral reactions and their limitations. In: Melchior and Bassett, R.L. (Eds.), Chemical Modeling of Aqueous Systems II, Chap. 31. American Chemical Society, Washington, DC, 398-413, ACS Symposium Series 416, 1991
- Nyström Claesson, A., and Andersson, K., PHRQKIN, a program simulating dissolution and precipitation kinetics in groundwater solutions. **Computers and Geosciences** 22:559-567. 1996.
- Numan A-L., and Weaver, C.E. Kinetics of acid-dissolution of palygorskite (attapulgite) and sepiolite. **Clays and Clay Minerals**, 17, 169 – 178. 1969.
- Oelkers E.H. An experimental study of forsterite dissolution rates as a function of temperature and aqueous Mg and Si concentrations. **Chemical Geology**. 175, 485 – 494. 2001a
- Oelkers, E.H., General kinetic description of multi-oxide silicate mineral and glass dissolution. **Geochimica et Cosmochimica Acta** 65, 3703-3719. 2001b
- Oelkers, E.H., and Gislason, S.R. The mechanism, rates, and consequences of basaltic glass dissolution: I. An experimental study of the dissolution rates of basaltic glass as a function of aqueous Al, Si, and oxalic acid concentration at 25°C and pH = 3 and 11. **Geochimica et Cosmochimica Acta** 65, 3671-3681. 2001
- Oelkers, E.H., Schott, J., An experimental study of enstatite dissolution rates as a function of pH, temperature, and aqueous Mg and Si concentration, and the mechanism of pyroxene/pyroxenoid dissolution. **Geochimica et Cosmochimica Acta** 65, 1219-1231. 2001.
- Oelkers, E.H. and Schott J. Dissolution and crystallization rates of silicate minerals as a function of chemical affinity. **Pure Appl. Chem.** 67, 903-910. 1995a
- Oelkers, E.H. and Schott J. Experimental study of anorthite dissolution and the relative mechanism of feldspar hydrolysis. **Geochimica et Cosmochimica Acta** 59, 5039 – 5053. 1995b
- Oelkers, E.H. and Schott J. Does organic acid adsorption affect alkali-feldspar dissolution rates? **Chemical Geology** 151, 235-245. 1998
- Oelkers, E. H. and Schott J. Experimental study of kyanite dissolution rates as a function of chemical affinity and solution composition. **Geochimica et Cosmochimica Acta**. 63, 785-797. 1999
- Oelkers, E.H., Schott, J., Devidal, J.-L. The effect of aluminum, pH, and chemical affinity on the rates of aluminosilicate dissolution rates. **Geochimica et Cosmochimica Acta** 58, 2011-2024. 1994
- Oelkers, E. H., Schott, J., Gauthier, J.M., Herrero-Roncal, T. An experimental study of the dissolution mechanism and rates of muscovite. **Geochimica et Cosmochimica Acta** 72, 4948-4961. 2008
- Oelkers, E.H., and Pointrasson, F., An experimental study of the dissolution stoichiometry and rates of a natural monazite as a function of temperature from 50 to 230 C and pH from 1.5 to 10. **Chemical Geology** 191, 73-87. 2002
- Oelkers, E.H., Benning, L.G., Lutz, S., Mavromatis, V., Pearce, C.R., Plümper, O., The efficient long-term inhibition of forsterite dissolution by common soil bacteria and fungi at Earth surface conditions. **Geochimica et Cosmochimica Acta** 168, 222-235. 2013
- Oelkers, E.H., Declercq, J., Saldi, G.D., Gislason, S.R., Schott, J., Olivine dissolution rates: A critical review. **Chemical Geology** 500, 1-19 2018
- Olsen, A.A.. Forsterite dissolution kinetics: Applications and implications for chemical weathering. Dissertation submitted to the faculty of the Virginia Polytechnic Institute and State University In: Geosciences. June 21, 2007 Blacksburg, Virginia 2007
- Olsen, A.A., Rimstidt, D.J., Oxalate-promoted forsterite dissolution at low pH. **Geochimica et Cosmochimica Acta** 72, 1758-1766. 2008.
- Olsson, M., Rosén, K., Melkerud, P.-A. Regional modelling of base cation losses from Swedish forest soils due to whole-tree harvesting. **Applied Geochemistry**, Suppl. Issue No.2, 189-194. 1993
- Opolot, E and Finke . P. 2015. Sensitivity of mineral dissolution rates to physical weathering: A modeling approach. **Geophysical Research Abstracts** Vol. 17, EGU2015-1807

- Oxburgh, R. The effect of pH, oxalate ion, and mineral composition on the dissolution rates of plagioclase feldspars. M.S. Thesis, University of Wyoming, Laramie, Wyo., 69 pp. 1991
- Oxburgh, R., Drever, J.I., Sun, T.-Y. Mechanism of plagioclase dissolution in acid solution at 25°C. **Geochimica et Cosmochimica Acta**, 58: 661-669. 1994
- Palandri, J.L. and Kharaka, Y.K. A compilation of rate parameters of water–mineral interaction kinetics for application to geochemical modeling, U.S.G.S Open file report 2004–1068, 64p. 2004
- Parkhurst, D.L., Thorstenson, D.C., Plummer, L.N., PHREEQE-A computerized program for geochemical calculations. Water Resources Invest. 80–96, U.S. Geol. Survey. 1980
- Phelan, J., Belyazid, S., Kurz, D., Guthrie, S., Cajka, J., Sverdrup, H., Waite, R. Estimation of soil base Cation weathering rates with the PROFILE model to determine critical loads of acidity for forested ecosystems in Pennsylvania, USA; Pilot application of a potential National methodology. **Water, Air and Soil Pollution**, 225: 2109-2128. 2014
- Phelan, J., Belyazid, S., Jones, P., Cajka, J., Buckley, J., Clark, C.: Assessing the Effects of Climate Change and Air Pollution on Soil Properties and Plant Diversity in Northeastern U.S. hardwood forests: Model simulations from 1900 - 2100. **Water, Air and Soil Pollution**, 227:84, 2016.
- Pokrowsky, O.S. and Schott, J. Kinetics and mechanism of forsterite dissolution at 25°C and pH from 1 to 12. **Geochimica et Cosmochimica Acta**. 64, 3313–3325. 2000a
- Pokrovsky, O.S., and Schott, J., Forsterite surface composition in aqueous solutions: a combined potentiometric, electrokinetic, and spectroscopic approach. **Geochimica et Cosmochimica Acta** 64, 3299–3312. 2000b.
- Pokrovsky, O.S. and Schott, J. Surface chemistry and dissolution kinetics of divalent metal carbonates. **Environ. Sci. Technol.** 36, 426 – 432. 2002
- Pokrovsky, O.S., Golubev, S.V., Schott, J. Impact of dissolved organics on mineral dissolution kinetics: towards a predictive model for Ca- and Mg-bearing oxides, carbonates and silicates. Abstract 13th V.M. Goldschmidt Conference, Copenhagen, Denmark. June 5–11, 2004. **Geochimica et Cosmochimica Acta**. 68, A141. 2004
- Porter, E., Sverdrup, H., Sullivan, T. Estimating and mitigating the impacts of climate change and air pollution on alpine plant communities in National parks, **Park Science Journal**. 28:58-64. 2011.
- Posch M., and Kurz D. A2M – A program to compute all possible mineral modes from geochemical analyses. **Computers & Geosciences** 33: 563-572. 2007
- Posch, M., Kurz, D., Alveteg, M., Akselsson, C., Eggenberger, U., Holmqvist, J; **A2M**, a model to quantify mineralogy from geochemical analyses. Available from [http://wge-ccc.org/Methods\\_Data/Computing\\_Mineralogy\\_from\\_Geochemical\\_Analysis](http://wge-ccc.org/Methods_Data/Computing_Mineralogy_from_Geochemical_Analysis); doi:10.1016/j.cageo.2006.08.007. 2007
- Posch, M., Hettelingh, J.-P., de Vries, W., Sverdrup, H., Wright, R.F. Manual for dynamic modelling of soil response to atmospheric deposition. UN/ECE Convention on long-range transboundary air pollution. Working group on effects/ICP on modelling and mapping. Coordination center for effects (CCE). RIVM/MNV, Bilthoven, Netherlands. 2006
- Poulson S.R., Drever J.I., and Stillings L.L. Aqueous Si-oxalate complexing, oxalate adsorption onto quartz, and the effect of oxalate upon quartz dissolution rates. **Chemical Geology** 140, 1–7. 1997
- Prajapati, P.R., Srinivasan, T.G., Chandramouli, V., Bhagwat, S.S. Dissolution kinetics of zirconium dioxide in nitric acid. **Desalination and Water Treatment**. 2 490–497. 2014
- Price, J., and Velbel, M.A. Rates of Biotite Weathering, and Clay Mineral Transformation and Neoformation, Determined from Watershed Geochemical Mass-Balance Methods for the Coweeta Hydrologic Laboratory, Southern Blue Ridge Mountains, North Carolina, USA. **Aquatic Geochemistry**. 20. 10.1007/s10498-013-9190-y
- Price, J.R., Velbel, M.A., Patino, L.A., Allanite and epidote weathering at the Coweeta Hydrologic Laboratory, western North Carolina, U.S.A **American Mineralogist** 90: 101-114. 2005.
- Price, J.R.; Bryan-Ricketts, D.S.; Anderson, D.; Velbel, M.A. Weathering of almandine garnet: influence of secondary minerals on the rate-determining step, and implications for regolith-scale Al mobilization. **Clays and Clay Minerals** 61:34-56. 2013.
- Prigobbe V., Costa G., Baciocchi R., Hanchen M. and Mazzotti M. The effect of CO<sub>2</sub> and salinity on olivine dissolution kinetics at 120°C. **Chemical Engineering Science** 64, 3510–3515. 2009
- Probst, A., Obeidy, C., Gaudio, N., Belyazid, S., Gégout, J.-C., Alard, D., Corket, E., Party, J.-P., Gauquelin, T., Mansat, A., Nihlgård, B., Leguëdois S., Sverdrup H.U. Evaluation of plant-responses to atmospheric nitrogen deposition in France using integrated soil-vegetation models. In: W. de Vries, J.-P. Hettelingh, M. Posch (Eds.) *Critical Loads and Dynamic Risk Assessments: Nitrogen, Acidity and Metals in Terrestrial and Aquatic Ecosystems*: 359-379. Springer Verlag, 2015
- Ouimet, R. and Duchesne, L. 2005. Base cation mineral weathering and total release rates from soils in three calibrated forest watersheds on the Canadian Boreal Shield. **Canadian Journal of Soil Science** 85: 245–260
- Ragnarsdottir K.V. Dissolution kinetics of heulandite at pH 2–12 and 25°C. **Geochimica et Cosmochimica Acta** 57:2439–2449. 1993
- Ragnarsdottir, K.V., Graham, C.M., Allen, G.C. Surface chemistry of reacted heulandite determined by SIMS and XPS. **Chemical Geology** 131, 167–181. 1996
- Raschman, P., Fedorockova, A., Dissolution kinetics of periclase in dilute hydrochloric acid. **Chemical Engineering Science** 63, 576–586. 2008.
- Rietz, F. Modeling mineral weathering and soil chemistry during post-glacial period., Reports in Ecology and Environmental Engineering, 1;1995. Department of Chemical Engineering, Lund University ISRN LUTKDH/TKKT-3004-SE. 1995
- Rimstidt, J.D., Brantley, S.L., Olsen, A.A. Systematic review of forsterite dissolution rate data. **Geochimica et Cosmochimica Acta** 99, 159-178. 2012.

- Rizzetto, S., Belyazid, S., Gegout, J.-C., Nicholas, M., Alard, D., Corcket, E., Gaidio, N., Sverdrup, H., Probst, A., Modelling the impact of climate change and atmospheric N deposition on French forests biodiversity. **Environmental Pollution** 213: 1016-1027. 2016.
- Rizzetto, S., Gégout, J.-C.; Belyazid, S.; Kuhn, E.; Sverdrup, H.; Probst, A., How to couple ecological database to geochemical dynamic model to predict the impact of atmospheric nitrogen deposition and climate change on French forest ecosystems at the national scale? International Congress on Environmental Modelling and Software. 75. <https://scholarsarchive.byu.edu/iemssconference/2016/Stream-D/75>. 2016.
- Roberts, N., Andersen, D.F., Deal, R.M., Shaffer, W.A. 1982, Introduction to Computer Simulation: A System Dynamics Approach Productivity Press, Chicago
- Ross, G.J., Acid dissolution of chlorites: release of magnesium, iron and aluminum and mode of acid attack. **Clays and Clay Minerals**, 17, 347-354. 1969
- Rosso, J.J., and Rimstidt, J.D. A high resolution study of forsterite dissolution rates. **Geochimica et Cosmochimica Acta**, 64, 797–811. 1999
- Rozalen, M., Ramos, M.E., Gervilla, F., Kerestedjian, T., Fiore, S., Huertas, F.J. Dissolution study of tremolite and anthophyllite: pH effect on the reaction kinetics. **Applied Geochemistry** 49:46-56. 2014
- RTI International. 2013. Application of the base cation weathering (BCw) methodology and PROFILE model to calculate terrestrial critical acid loads in Pennsylvania—evaluation of USGS landscapes project database as source of soil mineralogy data. Final report. pp. 85. [Google Scholar](#). 2013
- Running, S.W. and Gower, S.T. FOREST-BGC, a general model of forest ecosystem processes for regional applications, II. Dynamic carbon allocation and nitrogen budgets. **Tree Physiology**, 9, 147-160. 1991
- Running, S.W. Testing FOREST-BGC ecosystem process simulations across a climatic gradient in Oregon. **Ecol. Appl.**, 4, 238-247. 1994
- Saldi, G.D., Köhler, S.J., Marty, N., Oelkers, E.H., Dissolution rates of talc as a function of solution composition, pH and temperature. **Geochimica et Cosmochimica Acta** 71, 3446–3457. 2007
- Savage, D., Rochelle, C., Moore, Y., Milodowski, A., Bateman, K., Bailey, D., Mihara, M., Analcime reactions at 25-90°C in hyperalkaline fluids **Mineralogical Magazine**, 65, 571–587. 2001.
- Schnoor, J.L. Kinetics of chemical weathering: a comparison of laboratory and field weathering rates. In: Aquatic Chemical Kinetics (ed. W. Stumm). Wiley, New York, 475–504. 1990
- Schofield, R.E., Hausrath, E.M., and Gainey, S.R. Zeolite weathering in laboratory and natural settings, and implications for mars. 46th Lunar and Planetary Science Conference 2160.pdf. 2015
- Schott, J., Oelkers, E.H., Dissolution and crystallization rates of silicate minerals as a function of chemical affinity. Pure and applied chemistry 67, 903-910. 1995
- Schott, J., Pokrovsky, O.S., Oelkers, E.H. The Link Between Mineral Dissolution/Precipitation Kinetics and Solution Chemistry. **Reviews in Mineralogy and Geochemistry** 70: 207-258. 2009
- Schott, J., Oelkers, E., Benezeth, P., Godderis, Y., Francois, L. Can accurate kinetic laws be created to describe chemical weathering? **Comptes Rendus Geoscience** 344, 568-585. 2012
- Semenov, M., Bashkin, V., Sverdrup, H., Application of biochemical model PROFILE for assessment of North Asian ecosystem sensitivity to acid deposition. **Asian Journal of Energy and Environment** 1:143-161. 2000
- Senge P. The Fifth Discipline. The Art and Practice of the Learning Organisation. Century Business, New York. 1990
- Smits, M.M., and Wallander, H. Role of Mycorrhizal Symbiosis in Mineral Weathering and Nutrient Mining from Soil Parent Material. in *Mycorrhizal Mediation of Soil: Fertility, Structure, and Carbon Storage*. Elsevier Inc., pp. 35-46. DOI: 10.1016/B978-0-12-804312-7.00003-6. 2016
- Smits, M.M., Johansson, L., Wallander, H. Soil fungi appear to have a retarding rather than a stimulating role on soil apatite weathering. **Plant and Soil** 385: 217-228. 2014.
- Smith, M.M., Wolery, T.J., Carroll, S.A., Kinetics of chlorite dissolution at elevated temperatures and CO<sub>2</sub> conditions. **Chemical Geology** 347, 1–8. 2013.
- Soler, J.M., Cama, J., Galí, S., Meléndez, W., Ramírez, A., Estanga, J. Composition and dissolution kinetics of garnierite from the Loma de Hierro Ni-laterite deposit, **Venezuela Journal of Chemical Geology** 249, 191–202. 2008
- Starr, M., Lindroos, A.J., Tarvainen, T., Tanskanen, H., Weathering rates in the Hietajärvi Integrated Monitoring catchment. **Boreal Environment Research** 3: 275–285. 1998.
- Stegman B., and Sverdrup, H. Skogsmarkens försurning i Värmland – En prognos för framtiden. Länsstyrelsen i Värmlands Län, *Miljöenheten Rapport* 1997:11A:1-40. 1997
- Stegman B., Sverdrup, H. Skogsmarkens försurningskänslighet, kritisk belastning och modelberäkning. Länsstyrelsen i Älvsborgs Län, *Miljöenheten Meddelande* 1996:8:1-40. 1996
- Stendahl, J., Akselsson, C., Melkerud, P.A., Belyazid, S., Pedon-scale silicate weathering: Comparison of the PROFILE model and the depletion method at 16 forest sites in Sweden. **Geoderma**. 211–212. 65-74. 2013.
- Stephens, J.C., and Hering, J.G. Factors affecting the dissolution kinetics of volcanic ash soils: dependencies on pH, CO<sub>2</sub>, and oxalate. **Applied Geochemistry** 19: 1217–1232. 2003
- Stillings, L., Brantley, S. and Machesky, M.: 1995, Proton adsorption at an adularia feldspar surface, **Geochimica et Cosmochimica Acta** 59, 1473-1482.
- Stillings L.L. and Brantley S.L. Feldspar dissolution at 25°C and pH 3: reaction stoichiometry and the effect of cations. **Geochimica et Cosmochimica Acta** 59, 1483–1496. 1995
- Stillings L.L., Drever J.I., Brantley S.L., Sun Y., Oxburgh R. Rates of feldspar dissolution at pH 3–7 with 0–8 mM oxalic acid. **Chemical Geology** 132, 79–89. 1996
- Stockmann G., Wolff-Boenisch D., Gislason S.R., Oelkers E.H. Dissolution of diopside and basaltic glass: the effect of carbonate coating. **Mineralogical Magazine** 72, 135–139. 2008



- Stockmann, G.J., Wolff-Boenisch, D., Gislason, S.R., Oelkers, E.H., Do carbonate precipitates affect dissolution kinetics?: 2: Diopside. *Chemical Geology* 337, 56-66. 2013
- Stumm, W. and Wieland, E., Dissolution of oxide and silicate minerals; rates depend on surface speciation. In: Stumm, W. Ed., *Aquatic Chemical Kinetics*. Wiley-Interscience, New York. 1990
- Stumm, W. and Wollast, R., Coordination chemistry of weathering. **Rev. Geophys.** 28, 53–69. 1990
- Sverdrup, H. Calcite dissolution and acidification mitigation strategies, **Lake and Reservoir Management** 2:345-355. 1984
- Sverdrup, H.U., Calcite dissolution kinetics and lake neutralization. PhD Thesis, Chemical Engineering, Lund University. LUTTKDH/TKKT/1002/1-169/1985. 169pp. 1985.
- Sverdrup, H. *The kinetics of chemical weathering*. Lund University Press, Lund, Sweden and Chartwell-Bratt Ltd, London, ISBN 0-86238-247-5, 245pp. 1990
- Sverdrup, H. Methods for the estimation of base cation weathering rates. In; Annex IV; In: Bobbink, R., Draaijers, G., Erisman, J., Gregor, H.D., Henriksen, A., Hornung, M., Iversen, T., Kucera, V., Posch, M., Rihm, B., Spranger, T., Sverdrup, H., de Vries, W., Werner, B. In: Gregor H. D. and Werner B. (Eds.): Manual on methodologies and criteria for mapping critical levels/loads and geographical areas where they are exceeded. *Umweltbundesamt Texte* 71:96, ISSN 0722-186X. 1996.
- Sverdrup, H. Geochemistry, the key to understanding environmental chemistry. **Science of the Total Environment** 183, 67-87. 1996
- Sverdrup, H. Experimental kinetics of hornblende and epidote and their importance in integrated soil modelling. In: Sulovsky P., and Zeman, J., (Eds), *Environmental aspects of weathering processes*. Masaryk University Faculty of Science; 208-216. 1998
- Sverdrup, H. What is left for researchers in soil and water acidification modelling? Reflections over past experiences and future possibilities. In: Guardans, R. Data analysis for modelling and assessment of biogeochemical effects of air pollution in temperate ecosystems. Pages 49-60. CIEMAT, Madrid, Spain 8-11 October 1997. 1998.
- Sverdrup, H. Calculating critical loads of acidity and nitrogen for terrestrial ecosystems and some reflections on the Alberta situation. In K. Foster (Ed.), *Proceedings of the NOx/SOx management working group science colloquium on acid deposition, Alberta Research Council Reports*; 9-14, Edmonton. 2000
- Sverdrup, H. Nutrient sustainability for Swedish forests In: Developing principles for sustainable forestry Results from a research program in southern Sweden. Sverdrup, H., and Stjernquist, I., (Eds.) **Managing Forest Ecosystems** 5:427-432 Kluwer Academic Publishers, Amsterdam. 2002
- Sverdrup, H. Chemical weathering of soil minerals and the role of biological processes. **Fungal Biology Reviews** 23:94-100. 2009.
- Sverdrup, H. and Alveteg, M. PROFILE – The integrated model for transferring laboratory weathering kinetics to field conditions. In: Sulovsky P., and Zeman, J., (Eds), *Environmental aspects of weathering processes*, Masaryk University Faculty of Science; 218-224. 1998
- Sverdrup, H. and Bjerle, I. Dissolution of calcite and other related minerals in aqueous solutions in a pH-stat, **Vatten, Journal of Water Management and Research** 38:59-73. 1982
- Sverdrup, H., and Belyazid, S. The ForSAFE-VEG model system - Developing an approach for Sweden, Switzerland, United States and France for setting critical loads based on biodiversity in a time when management, pollution and climate change. **Ecological Modelling** 306: 35-45, Special Issue for the 2013 ISEM Conference at Toulouse. (Invited keynote lecture paper, [doi:10.1016/j.ecolmodel.2014.09.020](https://doi.org/10.1016/j.ecolmodel.2014.09.020)). 2014.
- Sverdrup, H., Holmqvist, J., A critical assessment of the use of kinetics, steady state or equilibrium in relation to reversibility or irreversibility in chemical weathering rate modelling (Unpublished note available as pdf from Sverdrup).
- Sverdrup, H. and Rosén, K. Long-term base cation mass balances for Swedish forests and the concept of sustainability. **Forest Ecology and Management** 110, 221-236. 1998.
- Sverdrup, H. and Stjernquist, I. *Developing Principles and Models for Sustainable Forestry in Sweden*. Kluwer Academic Publishers, Dordrecht, 480 pp. 2002.
- Sverdrup, H. and Warfvinge, P. Chemical weathering of minerals in the Gårdsjön catchment in relation to a model based on laboratory rate coefficients. In; *Critical loads for sulphur and nitrogen*, Nilsson, J., (Ed) Nordic Council of Ministers and The United Nations Economic Commission for Europe (UN/ECE). Stockholm, Nordic Council of Ministers *Miljörapport* 1988:15:131-150. 1988a
- Sverdrup, H. and Warfvinge, P. Assessment of critical loads of acid deposition on forest soils, In: *Critical loads for sulphur and nitrogen*, Nilsson, J., (Ed) Nordic Council of Ministers and The United Nations Economic Commission for Europe (ECE), Stockholm Nordic Council of Ministers *Miljörapport* 1988:15:81-130. 1988b
- Sverdrup, H. and Warfvinge, P. Weathering of primary silicate minerals in the natural soil environment in relation to a chemical weathering model, **Water, Air and Soil Pollution** 38:387-408. 1988c
- Sverdrup, H. and Warfvinge, P., The role of weathering in determining the acidity of lakes in Sweden. **Water, Air and Soil Pollution**, 52:71–78. 1990
- Sverdrup, H. and Warfvinge, P. On the geochemistry of chemical weathering. In: Rosen, K., (Ed.) *Chemical weathering under field conditions*: 79–118. Department of Forest Soils. Swedish Agricultural University. 1991
- Sverdrup, H. and Warfvinge, P. PROFILE-A mechanistic geochemical model for calculation of field weathering rates. In: Kharka, Y. and Maest, A. (Eds.), *Proceedings of the 7th International Symposium on water-rock interaction*, Utah, 13-19 July 1992, 44–48. Balkema Publishers. 1992a
- Sverdrup, H. and Warfvinge, P. PROFILE-A mechanistic geochemical model for calculation of field weathering rates. In: Y. Kharka and A. Maest (Eds.), *Proceedings of the 7th International Symposium on water-rock interaction*, Utah, 13-19 July 1992, 44–48. Balkema Publishers. 1992b
- Sverdrup, H. and Warfvinge, P. Critical loads. In Warfvinge, P. and Sandén, P. editors, *Modeling Acidification of*

- Groundwater. SMHI, Norrköping, 171-186. 1992c
- Sverdrup, H. and Warfvinge, P. Calculating field weathering rates using a mechanistic geochemical model—PROFILE. **Journal of Applied Geochemistry**, 8:273–283. 1993
- Sverdrup, H. and Warfvinge, P. Estimating field weathering rates using laboratory kinetics. In: White, A.F., Brantley, S.L., (Eds.), Chemical weathering rates of silicate minerals. Mineralogical Society of America, Washington DC. **Reviews in Mineralogy**, 31:485–541. 1995
- Sverdrup, H., Alveteg, M., Langan, S., Paces, T. Biogeochemical modelling of small catchments using PROFILE and SAFE. In S. Trudgill, (Ed), *Solute Modelling in Catchment Systems*, 75–99. John Wiley Science, New York. 1995
- Sverdrup H., Belyazid S., Nihlgård B., Ericson L. Modelling change in ground vegetation response to acid and nitrogen pollution, climate change and forest management in Sweden 1500-2100 A.D. **Water Air and Soil Pollution: Focus** 7: 163-179. 2007
- Sverdrup, H., Belyazid, S., Kurz, D., Braun, S. A proposed method for estimating critical loads for nitrogen based on biodiversity using a fully integrated dynamic model, with testing in Switzerland and Sweden. In: Sverdrup, H., (Ed.) Towards critical loads for nitrogen based on biodiversity. Background document for the 18th CCE workshop on the assessment of nitrogen effects under the ICP for Modelling and Mapping, LRTAP Convention (UNECE), Bern, Switzerland, 21-25 April 2008. Pages 3-37. Swiss Federal Office of the Environment (FOEN), Bern, Switzerland.. 2008
- Sverdrup, H., Belyazid, S., Akselsson, C., Posch, M. Assessing critical loads for nitrogen under climate change based on chemical and biological indicators in a sub-Arctic country; the case of Sweden. In: Bashkin, V., (Ed.); Ecological and biogeochemical cycling in impacted polar ecosystems. Nova Science Publishing, Hauppauge, New York. ISBN 978-1-53612-081-3. 2017.
- Sverdrup, H., Hagen-Thorn, A., Holmqvist, J., Warfvinge, P., Walse, C., Alveteg, M. Biogeochemical processes and mechanisms. In: Developing principles for sustainable forestry Results from a research program in southern Sweden. Sverdrup, H., and Stjernquist, I. (Eds.) **Managing Forest Ecosystems** 5:91-196. Kluwer Academic Publishers, Amsterdam. 2002
- Sverdrup H. (Ed.), Haraldsson, H., Koca, D., Belyazid, S. 2011 *System Thinking, System Analysis and System Dynamics: Modelling Procedures for Communicating Insight and Understanding by Using Adaptive Learning in Engineering for Sustainability*. 1<sup>st</sup> edition for Iceland. Two volumes, 30 printed. Háskolaprent Reykjavík. 310pp. 2011
- Sverdrup, H., Holmqvist, J., Butz-Braun., R., Clay-PROFILE – A new concept for modelling clay weathering rates and alteration sequences. (Unpublished note, available as pdf). 2010
- Sverdrup, H., Hoyesky, H., Achermann B. Critical loads of acidity for high precipitation areas. Bundesministerium fuer Umwelt, Jugend und Familie, Wien. 60pp. 1993
- Sverdrup, H., Martinsson, L., Alveteg, M., Moldan, F., Kronnäs, V., Munthe, J. Modeling recovery of Swedish ecosystems from acidification, **Ambio** 34:25-31. 2005
- Sverdrup, H., McDonnell, T.C., Sullivan, T.J., Nihlgård, B., Belyazid, S., Rihm, B., Porter, E., Bowman, W.D., Geiser, L. Testing the feasibility of using the ForSAFE-VEG model to map the critical load of nitrogen to protect plant biodiversity in the Rocky Mountains region, USA. **Water, Air and Soil Pollution**, 223:371-387. 2012.
- Sverdrup, H., Nihlgård, B., Svensson, M., Örlander, G. Skogsmarkens långsiktiga produktionsförmåga. In: J. Elmberg (Ed.) Sustainable Forestry in Southern Sweden, Årsrapport 1998; Tema Skogshälsa 37-39. 1998
- Sverdrup H., de Vries W., Henriksen A. Mapping Critical Loads. Environmental Report 1990:14 (NORD 1990:98), Nordic Council of Ministers, Copenhagen, 124 pp. 1990
- Sverdrup, H., Warfvinge, P., Bjerle, I. Opplösningsskinetikken for K-kalk i forhold till andre basiske mineral benyttet for nøytralisasjon av surt vann, Swedish Environmental Protection Board (SNV), Solna, Sweden *SNV Report* 3020. 1985
- Sverdrup, H., Warfvinge, P., Bjerle, I. Experimental determination of the kinetic expression for K-slag, a tricalcium silicate, in acidic aqueous solution at 25°C and in equilibrium with air, using the results from pH-stat experiments. **Vatten, Journal of Water Management and Research**. 42:210-217. 1986
- Sverdrup, H., Warfvinge, P., von Brömssen, U. A mathematical model for podzolic soil profiles exposed to acidic deposition. In: *Acidification and water pathways*, N. Christophersen (Ed), 435-444, ISBN 82-554-0486-4. Norwegian National Committee for Hydrology 1987a
- Sverdrup, H., Warfvinge, P., von Brömssen, U. A mathematical model for acidification and neutralization of soil profiles exposed to acid deposition. In: *Air pollution and ecosystems*—Proceedings of an International symposium held in Grenoble, France, 18-22 May, 1987, Mathy, P. (Ed) 817-822, D. Reidel publishing company, Dordrecht. 1987b
- Sverdrup, H., Warfvinge, P., Blake, L., Goulding, K. Modeling recent and historic soil data from the Rothamsted Experimental Station UK, using SAFE. **Agriculture, Ecosystems and Environment**, 53:161–177. 1995
- Sverdrup, H., Warfvinge, P., Wickman, T. Estimating the weathering rate at Gårdsjön using different methods. In: Hultberg H. and Skeffington R. (Eds.) *Experimental reversal of acid rain effects; The Gårdsjön roof project*. 231-250. John Wiley Science. 1998
- Sverdrup, H., Warfvinge, P., Frogner, T., Håöya, A.O., Johansson, M., Andersen, B. Critical loads for forest soils in the Nordic countries. **Ambio**, 21:348–355. 1992
- Sverdrup, H., Warfvinge, P., Moldan, F., Hultberg, H., Modelling acidification and recovery in the roofed catchment at Lake Gårdsjön using the SAFE model. **Water, Air and Soil Pollution** 85:1753-1758. 1996
- Sverdrup, H., Warfvinge, P., Janicki A., Morgan, R., Rabenhorst, M., Bowman, M. Mapping critical loads and steady state stream chemistry in the state of Maryland. **Environmental Pollution**, 77:195–203. 1992
- Sverdrup, H., Warfvinge, P., Rosen, K. Critical loads of acidity and nitrogen for Swedish forest ecosystems, and the relationship to soil weathering. In: H. Raitio and T. Kilponen, (Eds), Critical loads and critical limit values, *Metsäntutkimuslaitoksen tiedonantoja* 513:109–138, Vaasa, Finland 1994

- Sverdrup, H., Warfvinge, P., Britt, D. Assessing the potential for forest effects due to soil acidification in Maryland. **Water, Air and Soil Pollution** 87:245-265. 1996
- Sverdrup, H., Warfvinge, P., Hultberg, H., Andersson, B., Moldan, F. Modelling soil acidification and recovery in a roofed catchment; Application of the SAFE model. In: Hultberg H. and Skeffington R. (Eds.) *Experimental reversal of acid rain effects; The Gårdsjön roof project*. 363-382. John Wiley Science. 1998
- Sverdrup, H., Thelin, G., Robles, M., Stjernquist, I., Sörensen, J. Assessing sustainability of different tree species considering Ca, Mg, K, N and P at Björnstorps Estate. **Biogeochemistry** 81:219-238. 2006.
- Swoboda-Colberg N.G. and Drever J.I. Mineral dissolution rates in plot-scale field and laboratory experiments. **Chemical Geology** 105, 51–69. 1993
- Taylor, A.S., Blum, J.D., Lasaga, A.C., MacInnis, I.N. Kinetics of dissolution and Sr release during biotite and phlogopite weathering. **Geochimica et Cosmochimica Acta**, 64: 1191–1208. 1999.
- Taylor, A.S., Blum, J.D., Lasaga, A.C. The dependence of labradorite dissolution and Sr isotope release rates on solution saturation state. **Geochimica et Cosmochimica Acta** 64, 2389–2400. 2000
- Taylor, A. and Blum, J.D. Relation between soil age and silicate weathering rates determined from the chemical evolution of a glacial chronosequence. **Geology** 23: 979–982. 1995.
- Taylor, L.L., Beerling, D.J., Quegan, S., Banwart, S.A. Simulating carbon capture by enhanced weathering with croplands: an overview of key processes highlighting areas of future model development. **Biol. Lett.** 13 : 20160868. <http://dx.doi.org/10.1098/rsbl.2016.0868>. 2017
- Techer, I., Advocat, T., Vernaz, E., Lancelot, J.R., Liotard, J.M. Toulouse Goldschmidt Conference. **Mineralogical Magazine**, 62a: 1498-1499. 1998
- Teir, S., Revitzer, H., Eloneva, S., Fogelholm, C.-J., Zevenhoven, R. Dissolution of natural serpentinite in mineral and organic acids. **Int. J. Miner. Process.** 83 36–46. 2007
- Terry, B., The acid decomposition of silicate minerals Part I. Reactivities and modes of dissolution of silicates. **Hydrometallurgy** 10, 135–150. 1983a.
- Terry, B., The acid decomposition of silicate minerals Part II. Hydrometallurgical applications. **Hydrometallurgy** 10, 151–171. 1983b.
- Terry, B., Specific chemical rate constants for the acid dissolution of oxides and silicates. **Hydrometallurgy** 11, 315–344. 1983c.
- Terry, B., Monhemius, A.J. Acid dissolution of willemite (Zn,Mn)<sub>2</sub>SiO<sub>4</sub> and hemimorphite (Zn<sub>4</sub>Si<sub>2</sub>O<sub>7</sub>(OH)<sub>2</sub>H<sub>2</sub>O). **Metall. Trans. B** 14, 335–346. 1983.
- Thelin, G., Sverdrup, H., Holmqvist, J., Rosengren, U., Linden M. Sustainability in spruce and mixed forest stands. In: Developing principles for sustainable forestry Results from a research program in southern Sweden. Sverdrup, H., and Stjernquist, I., (Eds.) **Managing Forest Ecosystems** 5:337-354, Kluwer Academic Publishers, Amsterdam. 2002
- Thom, J.G.M., Dipple, G.M., Power, I.M., Harrison, A.L. Chrysotile dissolution rates: implication for carbon sequestration. **Applied Geochemistry** 35, 244–254. 2013
- Tominaga, K., Aherne, J., Watmough, S.A., Alveteg, M., Cosby, B.J., Driscoll, C.T., Posch, M., Pourmokhtarian, A., Predicting Acidification Recovery at the Hubbard Brook Experimental Forest, New Hampshire: Evaluation of Four Models **Environmental Science & Technology**. 44, 9003-9009. 2010
- Traven, L., Fijan-Parlov, S., Galović, L., Sverdrup, H.: Prospects for a regional assessment of forest soil chemistry dynamics in Croatia: Application of the SAFE model to a forested site in the region of mount Medvednica. **Periodicum Biologorum** 01/2005; 107:17-26. 2005
- Turpault, M.P., and Trotignon, L. The dissolution of biotite single crystals in dilute HNO<sub>3</sub> at 24°C; evidence of an anisotropic corrosion process of micas in acidic solution. **Geochimica et Cosmochimica Acta** 58, 2761–2775. 1994
- Ullman, W.J., Kirchman, D.L., Welch, S.A., Vandevivere P. Laboratory evidence for microbially mediate silicate dissolution in nature. **Chemical Geology** 132, 11–17. 1996
- Valsami-Jones, E., Ragnarsdottir, K.V., Putnis, A., Bosbach, D., Kemp, A.J., Cressey, G. The dissolution of apatite in the presence of aqueous metal cations at pH 2–7. **Chemical Geology** 151:215–233. 1998
- Velbel, M.A., Bond strength and the relative weathering rates of simple orthosilicates. **American Journal of Science** 299, 679–696. 1999
- Velbel M.A. Constancy of silicate-mineral weathering-rate ratios between natural and experimental weathering: Implications for hydrologic control of differences in absolute rates. **Chemical Geology** 104, 89 –99. 1993
- de Vries W., Wamelink, W., Dobben, H., Kros, H., Reinds, G. J., Mol-Dijkstra, J., Smart, S., Evans, C., Rowe, E., Belyazid, S., Sverdrup, H., Hindsberg, A., Posch, M., Hettelingh, J-P., Spanger, T., Bobbink, R. Use of dynamic soil-vegetation models to assess impacts of nitrogen deposition on plant species composition: an overview. **Ecological Applications** 20: 60-79; DOI: [10.1890/08-1019.1](https://doi.org/10.1890/08-1019.1) 2010.
- de Vries, W., Kros, H., Reinds, G. J., Wamelink, W., van Dobben, H., Bobbink, R., Smart, S., Evans, C., Schlütow, A., Kraft, P., Belyazid, S., Sverdrup, H., van Hinsberg, A., Posch, M., Hettelingh J-P. Developments in modelling critical nitrogen loads for terrestrial ecosystems in Europe 230pp, *Developments in Deriving Critical Limits and Modeling Critical Loads of Nitrogen for Terrestrial Ecosystems in Europe*. Alterra, CCE Report critical N limits and loads CCE. 174 ISSN 1566-7197 ©2006 Alterra, Box 47, 6700 AA Wageningen; The Netherlands; e-mail: [info.alterra@wur.nl](mailto:info.alterra@wur.nl). 2006
- Voltini, M., Artioli, G., Moret, M. The dissolution of laumontite in acidic aqueous solutions: A controlled-temperature in situ atomic force microscopy study **American Mineralogist**, 97: 150–158, 2012.
- Wallman, P., Svensson, M.G.E., Sverdrup, H., Belyazid, S., ForSAFE - an integrated process-oriented forest model for long-term sustainability assessments, **Forest Ecology and Management**, 207:19-36. 2005.
- Wallman, P., Sverdrup, H. Developing the complex forest ecosystem model FORSAFE - motives, means and the learning



- loop. In: Björk, L. (Ed.) *Sustainable Forestry in Temperate Regions*. Proceedings of the SUFOR International Workshop, April 7-9, 2002 in Lund, Sweden: page 154. 2002.
- Wang, F., Silicate Mineral Dissolution and Associated Carbonate Precipitation at Conditions Relevant to Geologic Carbon Sequestration. All Theses and Dissertations (ETDs). PhD thesis. 1161. <http://openscholarship.wustl.edu/etd/1161> 170pp. 2013
- Wang, F., Giammar, D.E. Forsterite dissolution in saline water at elevated temperature and high CO<sub>2</sub> pressure. **Environ. Sci. Technol.** 47, 168–173. 2012
- Wang, H., Feng, Q., Rang, X., Zuo, K., Liu, K., Insights into alkali-acid leaching of sericite: Dissolution behaviour and mechanism. **Minerals** 7: 196-208. 2017.
- Warfvinge, P., and Sverdrup, H., Soil liming and runoff acidification mitigation, **Lake and Reservoir Management** 2:389-393. 1984
- Warfvinge P. and Sverdrup H. Calculating critical loads of acid deposition with PROFILE - A steady-state soil chemistry model. **Water, Air and Soil Pollution** 63: 119-143. 1992a
- Warfvinge, P. and Sverdrup, H. Hydrochemical modeling 79-118. In: Warfvinge, P. and Sandén, P., (Eds.), *Modeling Acidification of Groundwater*. SMHI, Norrköping. 1992b.
- Warfvinge, P. and Sverdrup, H. Scenarios for acidification of groundwater 147-156. In: Warfvinge, P. and Sandén, P. (Eds.), *Modeling Acidification of Groundwater*. SMHI, Norrköping. 1992c
- Warfvinge, P. and Sverdrup, H. Modeling regional mineralogy and weathering rates. In: Kharka, Y. and Maest, A. (Eds.), *Proceedings of the 7th International Symposium on water-rock interaction*, held in Utah, July 13-19, 1992, 49–53. Balkema Publishers. 1992d
- Warfvinge P., and Sverdrup H. Critical loads of acidity to Swedish forest soils. Reports in Ecology and Environmental Engineering 1993;5, Lund University, Lund, Sweden, 104 pp. 1993
- Warfvinge, P., Sverdrup, H., Modelling limestone dissolution in soils. **Soil Science Society of America Journal**, 53:44–51. 1989
- Warfvinge, P., Sverdrup, H., Critical loads of acidity to Swedish forest soils, *Reports in Environmental Engineering and Ecology*, 5:95, 127pp, Chemical Engineering II, Box 124, Lund University. 221 00 Lund, Sweden. 1995
- Warfvinge, P., Falkengren-Grerup, U., Sverdrup, H., Andersen, B. Modeling long-term cation supply in acidified forest stands. **Environmental Pollution** 80:209–221. 1993.
- Warfvinge, P., Mörtz, M., Moldan, F. What processes govern recovery? In: *Recovery from Acidification in the Natural Environment: Present Knowledge and Future Scenarios*. Warfvinge, P. and Bertills, U. (eds). Report 5034, Swedish Environmental Protection Agency, 23–36. 2000.
- Warfvinge, P., Sverdrup, H., Alveteg, M., Rietz, F. Modelling geochemistry and lake pH since glaciation at lake Gårdsjön. **Water, Air and Soil Pollution** 85:713-718. 1996
- Warfvinge, P., Sverdrup, H., Norrström, A.C., Jacks, G. A model for dissolution of limestone in soils and neutralization of soil systems. In: *Acidification and Water Pathways*, N. Christophersen (Ed), 137-146, ISBN 82-554-0486-4. Norwegian National Committee for Hydrology. Bolkesjø, Norway. 1987
- Warfvinge, P., Sverdrup, H., Ågren, G., Rosen, K. Effekter av luftföroreningar på framtida skogstillväxt. In: L. Svensson (Ed.) Skogspolitiken inför 2000-talet—1990 års skogspolitiska kommitte, Peer-reviewed in a public Parliamentary hearing in 1992. **Statens Offentliga Utredningar**; 1992 SOU: 76: 377–412. Reviewed at a public hearing in the Swedish Parliament by parliament members and Swedish scientists. 1992
- Warfvinge, P., Sverdrup, H., Rosen, K. Calculating critical loads for N to forest soils. In: Grennfelt P.I. and Lövblad G., (Eds) *Critical Loads and Levels for Nitrogen*, 403–417. Nordic Council of Ministers. Nord 1992:41. 1992
- Warfvinge, P., Sverdrup, H., Alveteg, M. and Rietz, F.: Modelling geochemistry and lake pH since glaciation at lake Gårdsjön, In: P.I. Grennfelt and J. Wisniewski (eds), Proceedings of the Acid Reign 95? Conference, Water, Air and Soil Pollution Journal, Kluwer, Amsterdam, p. 6-12. 1996,
- Weissbart, E.J. and Rimstidt, J.D. Wollastonite: incongruent dissolution and leached layer formation. **Geochimica et Cosmochimica Acta** 64, 4007–4016. 2000
- Welch, S.A. and Ullman, W.J. The effect of organic acids on plagioclase dissolution rates and stoichiometry. **Geochimica et Cosmochimica Acta** 57, 2725–2736. 1993
- Welch, S. and Ullman, W. Feldspar dissolution in acidic and organic solutions: Compositional and pH dependence of dissolution rate. **Geochimica et Cosmochimica Acta** 60, 2939–2948. 1996
- Welch, S.A. and Ullman, W.J. The temperature dependence of bytownite feldspar dissolution in neutral aqueous solutions of inorganic and organic ligands at low temperature (5–35°C). **Chemical Geology** 167, 337–354. 2000
- Westrich, H.R., Cygan, R.T., Casey, W.H., Zemitis, C., Arbold, G.W. The dissolution kinetics of mixed-cation orthosilicate minerals. **American Journal of Science** 293, 869 – 893. 1993
- White A. and Brantley S.L. The effect of time on the weathering of silicate minerals: why do weathering rates differ in the laboratory and field? **Chemical Geology** 202, 479–506. 2003
- White, A.F., S.L. Brantley. Chemical Weathering Rates of Silicate Minerals: An Overview, in Chemical Weathering Rates of Silicate Minerals A.F. White and S.L. Brantley (eds.), Mineralogical Society of America Short Course, **Reviews in Mineralogy** 31, 1-22. 1995.
- White, A.F. and Blum, A.E. Effects of climate on chemical weathering in watersheds. **Geochimica et Cosmochimica Acta** 59, 1729– 1747. 1995
- White, A.F., Blum, A.E., Bullen, T.D., Vivit, D.V., Schulz, M., Fitzpatrick, J. The effect of temperature on experimental and natural chemical weathering rates of granitoid rocks. **Geochimica et Cosmochimica Acta** 63, 3277–3291. 1999
- Whitfield, C. J., Watmough, S. A., Aherne, J., and Dillon, P. J.: A comparison of weathering rates for acid-sensitive catchments in Nova Scotia, Canada and their impact on critical load calculations, **Geoderma**, 136, 899–911, doi:10.1016/j.geoderma.2006.06.004. 2006

- Whitfield, C.J., Phelan, J.N., Buckley, J., Clark, C.M., Guthrie, S., Lynch, J.A., Estimating Base Cation Weathering Rates in the USA: Challenges of Uncertain Soil Mineralogy and Specific Surface Area with Applications of the PROFILE Model. **Water, Air and Soil Pollution** 61 <https://doi.org/10.1007/s11270-018-3691-7>, 2018.
- Whitfield, C. J., and Watmough, S. A. (2012). A regional approach for mineral soil weathering estimation and critical load assessment in boreal Saskatchewan, Canada. **Science of the Total Environment**, 437, 165–172.
- Whitfield, C.J., Aherne, J., Watmough, S.A.. Modeling soil acidification in the Athabasca Oil Sands Region, Alberta, Canada. **Environ. Sci. Technol.** 43: 5844–5850. 2009.
- Whitfield, C.J., Aherne, J., Watmough, S.A., McDonald, M. Estimating the sensitivity of forest soils to acid deposition in the Athabasca Oil Sands Region, Alberta. **J. Limnol.** 69: 201–208. 2010.
- Wogelius, R.A. and Walther, J.V. Olivine dissolution at 25°C: effects of pH, CO<sub>2</sub>, and organic acids. **Geochimica et Cosmochimica Acta** 55, 943–954. 1991
- Wogelius, R.A. and Walther, J.V. Olivine dissolution kinetics at near-surface conditions. **Chemical Geology** 97, 101 – 112. 1992
- Wolery, T.J. EQ3/6, a software package for geochemical modeling of aqueous systems. Lawrence Livermore National Laboratory Report UCRL MA-110662-PT-1. 1992.
- Wolff-Boenisch, D., Gislason, S.R., Oelkers, E.H. The effect of fluoride on the dissolution rates of natural glasses at pH 4 and 25°C. **Geochimica et Cosmochimica Acta** 68, 4571–4582. 2004a
- Wolff-Boenisch, D., Gislason, S.R., Oelkers, E.H., Putnis, C.V., The dissolution rates of natural glasses as a function of their composition at pH 4 and 10.6, and temperatures from 25 to 74°C. **Geochimica et Cosmochimica Acta** 68, 4843–4858. 2004b.
- Wolff-Boenisch, D., Wenau, S., Gislason, S.R., Oelkers, E.H. Dissolution of basalts and peridotite in seawater, in the presence of ligands, and CO<sub>2</sub>: implications for mineral sequestration of carbon dioxide. **Geochimica et Cosmochimica Acta** 75, 5510–5525. 2011
- Wolff-Boenisch, D., Gislason, S.R., Oelkers, E.H., The effect of crystallinity on dissolution rates and CO<sub>2</sub> consumption capacity of silicates. **Geochimica et Cosmochimica Acta** 70, 858–870. 2006.
- Wood, A., Anovitz, L.M., Elam, J.M., Cole, D.R. Riciputi, Benezeth, P. The effect of fulvic acid on the extent and rate of dissolution of obsidian. Ninth Annual V. M. Goldschmidt Conference 1999.
- Xie, Z. and Walther, J.V. Dissolution stoichiometry and adsorption of alkali and alkaline earth elements to the acid-reacted wollastonite surface at 25°C. **Geochimica et Cosmochimica Acta** 58, 2587–2598. 1994
- Xiao, Y., and Lasaga, A. C., Ab initio quantum mechanical studies of the kinetics and mechanisms of silicate dissolution: H(H<sub>3</sub>O<sup>+</sup>) catalysis: **Geochimica et Cosmochimica Acta**, 58, 5379–5400. 1994a,
- Xiao, Y., and Lasaga, A.C. Ab initio quantum mechanical studies of the kinetics and mechanisms of silicate dissolution: OH<sup>-</sup> catalysis: **Geochimica et Cosmochimica Acta**, 60, 2283–2295. 1994b
- Yadaw, V.P, Sharma, T., Saxena, V.K., Dissolution kinetics of potassium from glauconitic sandstone in acid lixiviant. **International Journal of Mineral Processing** 60: 15–36. 2000
- Yadaw, S.K., and Chakrapani, G.J., Dissolution kinetics of rock–water interactions and its implications. **Current Science**, 90, 932–938. 2006
- Yang, L., and Steefel, C.I. Kaolinite dissolution and precipitation kinetics at 22°C and pH 4. **Geochimica et Cosmochimica Acta**, 72, 99–116. 2008.
- Yoo, K., Kim, B-S., Kim, M-S., Lee, J., Jeong, J. Dissolution of Magnesium from Serpentine Mineral in Sulfuric Acid Solution. **Materials Transactions**, 50, 1225 – 1230. 2009
- Yu, L., Zanchi, G., Akselsson, C., Wallander, H., Belyazid, S. Modeling the forest phosphorus nutrition in a southwestern Swedish forest site. **Ecological modelling** 369:88–100. 2017.
- Yu, L., Belyazid, S., Akselsson, C., van der Heijden, G., Zanchi, G. Storm disturbances in a Swedish forest—A case study comparing monitoring and modelling. **Ecological Modelling** 320, 102–113. 2016
- Zabowski, D., Skinner, M.F., Payn, T.W., Nutrient release by weathering: implications for sustainable harvesting of PINUS radiata in New Zealand soils. **New Zealand Journal of Forestry Science** 37: 336–354. 2007.
- Zanchi, G., Belyazid, S., Akselsson, C., Yu, L. Modelling the effects of management intensification on multiple forest services: a Swedish case study. **Ecological Modelling**, 284, 48–59. 2017
- Zanchi, G.: Modelling nutrient transport from forest ecosystems to surface waters: The model ForSAFE2D. Lund, Sweden: PhD Thesis. Lund University, Faculty of Science, Department of Physical Geography and Ecosystem Science. ISBN: 9789185793686. 2016.
- Zanchi, G., Belyazid, S., Akselsson, C., Yu, L., Bishop, K., Köhler, S., Grip, H. A Hydrological Concept Including Lateral Water Flow Compatible with the Biogeochemical Model ForSAFE. **Hydrology**, 3, 11–28. doi:10.3390/hydrology3010011. 2016.
- Zassi, Å. Chlorite: Geochemical properties, Dissolution kinetics and Ni(II) sorption. Doctoral Thesis in Chemistry KTH Chemical Science and Engineering Stockholm, Sweden, 2009
- Zavodsky, D, Babiakova, G., Mitosinkova, M., Pukancikove, Roncak, P., Bodis, D., Rapant, S., Mondas, J., Skvarenina, J., Cambel, B., Rehak, S., Wathne, B., Henriksen, A., Sverdrup, H., Tørseth, K., Semb, A, Aamlid, D. Mapping critical loads/levels in the Slovak Republic. **Acid Rain Research** 37:1996. Niva, Oslo. 1995
- Zavodsky, D, Babiakova, G., Mitosinkova, M., Pukancikove, Roncak, P., Bodis, D., Rapant, S., Mondas, J., Skvarenina, J., Cambel, B., Rehak, S., Curlik, J., Wathne, B., Henriksen, A., Sverdrup, H., Tørseth, K., Semb, A, Aamlid, D., Mulder, J., 1996. Mapping critical loads/levels in the Slovak Republic. Final report. **Acid Rain Research** 43:1996. Niva, Oslo.
- Zhang, H.L., Bloom, P.R., Nater, E.A., Erich, M.S. Rates and stoichiometry of hornblende dissolution over 115 days of laboratory weathering at pH 3.6–4.0 and 25°C in 0.01M lithium acetate. **Geochimica et Cosmochimica Acta** 60, 941 – 950. 1996

- Zhang, H., Bloom, P. The pH dependence of hornblende dissolution **Soil Science**, 164:624-632. 1999
- Zhang, H., Bloom, P. Dissolution Kinetics of Hornblende in Organic Acid Solutions. **Soil Science Society of America Journal** 63: 815-822. 1999
- Zhang, R., Zhang, X., Guy, B., Hu, S., de Ligny, D., Moutte, J. Experimental study of dissolution rates of hedenbergitic clinopyroxene at high temperatures: dissolution in water from 25°C to 374°C. **Eur. J. Mineral.** 25, 353–372. 2013
- Zhang, L. and Lüttge, A. Al-Si order in albite and its effect on albite dissolution processes: a Monte Carlo study. **American Mineralogist** 92, 1316–1324. 2007
- Zhang, L. and Lüttge, A. Theoretical approach to evaluating plagioclase dissolution mechanisms. **Geochimica et Cosmochimica Acta** 73, 2832–2849. 2009a
- Zhang, L. and Lüttge, A. Morphological evolution of dissolving feldspar particles with anisotropic surface kinetics and implication for dissolution rate normalization and grain size dependence: A kinetic modelling study. **Geochimica et Cosmochimica Acta** 73, 6757–6770. 2009b
- Zhu, C., and Lu, P., Alkali feldspar dissolution and secondary mineral precipitation in batch systems: 3. Saturation states of product minerals and reaction paths. **Geochimica et Cosmochimica Acta** 73: 3171-3200. 2009
- Zhu, C., Lu, P., Zheng, Z. and Ganor, J. Coupled alkali feldspar dissolution and secondary mineral precipitation in batch systems: 4. Numerical modeling of kinetic reaction paths. **Geochimica et Cosmochimica Acta** 74, 3963–3983. 2010
- Zhu, C., Blum, A.E., Veblen, D.R. Feldspar dissolution rates and clay precipitation in the Navajo aquifer at Black Mesa, Arizona, USA. In: Wanta R.B., Seal R.R.I. (eds) Water-rock interaction. August Aimé Balkema, Saratoga Springs, pp 895–899. 2004
- Zysset, M., and Schindler, P.W. The proton promoted dissolution kinetics of K-montmorillonite. **Geochimica et Cosmochimica Acta** 60, 921-931. 1996
- Öborn, I., Modin-Edman, A. K., Bengtsson, H., Gustafson, G., Salomon, E., Nilsson, S. I., Holmqvist, J., Jonsson, S., Sverdrup, H. 2005. A Systems Approach to Assess Farm-Scale Nutrient and Trace Element Dynamics: A Case Study at the Öjebyn Dairy Farm. **Ambio** 34:298-308

Table 3. Dissolution kinetics parameterization for the 103 minerals from 12 major mineral structural groups that can be used by the PROFILE and ForSAFE models for estimating the field soil weathering rate, expressed as the value at 8°C. Many of the minerals can be grouped into closely related crystallographic groups where many analogues are possible. C is the limiting concentration for retarders in the format  $C \cdot 10^{-6}$  kmol/m<sup>3</sup>. Data was also taken from earlier unpublished experimental data from the earlier weathering experiments by Sverdrup and Holmqvist's laboratory experimental archives (These are kept by Sverdrup in University of Iceland. Numbers in **bold** are based on an estimate based on an experiment. All other are in some was estimated from interpolation or analogues. The table was revised at workshop at Ystad Saltsjöbad, April 11-14, 2016. Reassessed during 2017 and 2018 by integrating more information from the scientific literature. Nothing fundamental changed after 2016, but some numbers are backed up better.

| Mineral                        |                             | Fundamental chemical weathering reaction coefficients, reaction orders, and feedback effect threshold concentrations |                   |                 |                 |                 |                 |                           |                 |                 |                 |                 |                 |                                        |                   |                  |                    |                  |                  |                   |                  |                 |                 |                 |                 |                 |                 |
|--------------------------------|-----------------------------|----------------------------------------------------------------------------------------------------------------------|-------------------|-----------------|-----------------|-----------------|-----------------|---------------------------|-----------------|-----------------|-----------------|-----------------|-----------------|----------------------------------------|-------------------|------------------|--------------------|------------------|------------------|-------------------|------------------|-----------------|-----------------|-----------------|-----------------|-----------------|-----------------|
|                                |                             | H <sup>+</sup> -reaction                                                                                             |                   |                 |                 |                 |                 | H <sub>2</sub> O-reaction |                 |                 |                 |                 |                 | CO <sub>2</sub> -reaction <sup>4</sup> |                   | Organic acids    |                    |                  | OH-reaction      |                   |                  |                 |                 |                 |                 |                 |                 |
|                                |                             | pk <sub>H</sub>                                                                                                      | n <sub>H</sub>    | y <sub>Al</sub> | C <sub>Al</sub> | x <sub>BC</sub> | C <sub>BC</sub> | pk <sub>H2O</sub>         | y <sub>Al</sub> | C <sub>Al</sub> | x <sub>BC</sub> | C <sub>BC</sub> | Z <sub>Si</sub> | C <sub>Si</sub>                        | pk <sub>CO2</sub> | n <sub>CO2</sub> | pk <sub>Org</sub>  | n <sub>Org</sub> | C <sub>Org</sub> | pk <sub>OH-</sub> | w <sub>OH-</sub> | y <sub>Al</sub> | C <sub>Al</sub> | x <sub>BC</sub> | C <sub>BC</sub> | Z <sub>Si</sub> | C <sub>Si</sub> |
| 1a. Feldspars; techtosilicates |                             |                                                                                                                      |                   |                 |                 |                 |                 |                           |                 |                 |                 |                 |                 |                                        |                   |                  |                    |                  |                  |                   |                  |                 |                 |                 |                 |                 |                 |
| 1.1                            | K-Feldspar, generic         | 14.7                                                                                                                 | 0.5               | 0.4             | 0.4             | 0.4             | 0.5             | 17.5                      | 0.14            | 4               | 0.15            | 300             | 3               | 900                                    | 16.95             | 0.6              | 15.0               | 0.5              | 5                | 15.2              | 0.3              | 0.1             | 12              | 0.5             | 5               | 1               | 900             |
| 1.2                            | K-Feldspar I,               | 14.8                                                                                                                 | 0.5               | 0.4             | 0.4             | 0.4             | 0.5             | 17.8                      | 0.14            | 4               | 0.15            | 300             | 3               | 900                                    | 17.05             | 0.6              | 15.1               | 0.5              | 5                | 15.4              | 0.3              | 0.1             | 12              | 0.5             | 5               | 1               | 900             |
| 1.3                            | K-Feldspar II;              | 14.7                                                                                                                 | 0.5               | 0.4             | 0.4             | 0.4             | 0.5             | 17.4                      | 0.15            | 4               | 0.15            | 300             | 4               | 900                                    | 16.85             | 0.6              | 13.9               | 0.5              | 5                | 15.3              | 0.3              | 0.1             | 12              | 0.5             | 5               | 1               | 900             |
| 1.4                            | K-Feldspar III              | 14.7                                                                                                                 | 0.5               | 0.4             | 0.4             | 0.4             | 0.5             | 17.4                      | 0.15            | 4               | 0.15            | 300             | 4               | 900                                    | 16.80             | 0.6              | 13.9               | 0.5              | 5                | 15.2              | 0.3              | 0.1             | 12              | 0.5             | 5               | 1               | 900             |
| 1.5                            | Anorthoclase                | 13.6                                                                                                                 | 0.6               | 0.4             | 0.5             | 0.4             | 0.5             | 17.2                      | 0.15            | 5               | 0.15            | 300             | 3               | 900                                    | 16.65             | 0.6              | 13.7               | 0.5              | 5                | 14.2              | 0.3              | 0.1             | 15              | 0.5             | 5               | 2               | 900             |
| 1.6                            | Albite (Ab)                 | 14.6                                                                                                                 | 0.5               | 0.4             | 0.4             | 0.4             | 0.5             | 16.8                      | 0.15            | 4               | 0.15            | 200             | 3               | 900                                    | 16.05             | 0.6              | 14.7               | 0.5              | 5                | 15.4              | 0.3              | 0.1             | 12              | 0.5             | 5               | 3               | 900             |
| 1.7                            | Oligoclase                  | 14.6                                                                                                                 | 0.5               | 0.4             | 0.4             | 0.4             | 1               | 16.8                      | 0.15            | 4               | 0.15            | 250             | 4               | 900                                    | 16.05             | 0.6              | 14.7               | 0.5              | 5                | 15.4              | 0.3              | 0.1             | 12              | 0.5             | 4               | 3               | 900             |
| 1.8                            | Labradorite                 | 13.9                                                                                                                 | 0.5               | 0.3             | 0.5             | 0.4             | 2               | 16.8                      | 0.15            | 5               | 0.15            | 300             | 5               | 900                                    | 16.05             | 0.6              | 14.7               | 0.5              | 5                | 14.5              | 0.3              | 0.1             | 15              | 0.5             | 3               | 3               | 900             |
| 1.9                            | Bytownite                   | 13.8                                                                                                                 | 0.6               | 0.3             | 0.6             | 0.4             | 3               | 16.7                      | 0.15            | 6               | 0.15            | 300             | 6               | 900                                    | 15.95             | 0.6              | 14.6               | 0.5              | 5                | 14.4              | 0.3              | 0.1             | 18              | 0.5             | 3               | 3               | 900             |
| 1.10                           | Other plagioclase           | 14.6                                                                                                                 | 0.5               | 0.4             | 0.4             | 0.4             | 1               | 16.8                      | 0.15            | 4               | 0.15            | 250             | 4               | 900                                    | 16.05             | 0.6              | 14.7               | 0.5              | 5                | 15.4              | 0.3              | 0.1             | 12              | 0.5             | 4               | 3               | 900             |
| 1b. Zeolites; techtosilicates  |                             |                                                                                                                      |                   |                 |                 |                 |                 |                           |                 |                 |                 |                 |                 |                                        |                   |                  |                    |                  |                  |                   |                  |                 |                 |                 |                 |                 |                 |
| Mineral                        |                             | H <sup>+</sup> -reaction                                                                                             |                   |                 |                 |                 |                 | H <sub>2</sub> O-reaction |                 |                 |                 |                 |                 | CO <sub>2</sub> -reaction              |                   | Organic acids    |                    |                  | OH-reaction      |                   |                  |                 |                 |                 |                 |                 |                 |
|                                |                             | pk <sub>H</sub>                                                                                                      | n <sub>H</sub>    | y <sub>Al</sub> | C <sub>Al</sub> | x <sub>BC</sub> | C <sub>BC</sub> | pk <sub>H2O</sub>         | y <sub>Al</sub> | C <sub>Al</sub> | x <sub>BC</sub> | C <sub>BC</sub> | Z <sub>Si</sub> | C <sub>Si</sub>                        | pk <sub>CO2</sub> | n <sub>CO2</sub> | pk <sub>Org</sub>  | n <sub>Org</sub> | C <sub>Org</sub> | pk <sub>OH-</sub> | w <sub>OH-</sub> | y <sub>Al</sub> | C <sub>Al</sub> | x <sub>BC</sub> | C <sub>BC</sub> | Z <sub>Si</sub> | C <sub>Si</sub> |
| 1.11                           | Helulandite                 | 11.9                                                                                                                 | 0.73              | 0.2             | 30              | 0.2             | 20              | 16.8                      | 0.15            | 4               | 0.15            | 250             | 3               | 900                                    | 16.05             | 0.6              | 14.7               | 0.5              | 5                | 14.8              | 0.3              | 0.1             | 12              | 0.5             | 4               | 2               | 900             |
| 1.12                           | Analcime                    | 14.5                                                                                                                 | 0.5               | 0.2             | 30              | 0.2             | 20              | 16.5                      | 0.15            | 4               | 0.15            | 250             | 3               | 900                                    | 16.05             | 0.6              | 14.7               | 0.5              | 5                | 12.4              | 0.4              | 0.1             | 12              | 0.5             | 4               | 2               | 900             |
| 1.13                           | Clinoptilolite              | 14.5                                                                                                                 | 0.3               | 0.2             | 30              | 0.2             | 20              | 16.5                      | 0.15            | 4               | 0.15            | 250             | 3               | 900                                    | 16.05             | 0.6              | 14.7               | 0.5              | 5                | 14.8              | 0.3              | 0.1             | 12              | 0.5             | 4               | 2               | 900             |
| 1.14                           | Stilbite                    | 14.5                                                                                                                 | 0.3               | 0.2             | 30              | 0.2             | 20              | 16.2                      | 0.15            | 4               | 0.15            | 250             | 3               | 900                                    | 16.05             | 0.6              | 14.7               | 0.5              | 5                | 14.7              | 0.3              | 0.1             | 12              | 0.5             | 4               | 2               | 900             |
| 2. Nesosilicates               |                             |                                                                                                                      |                   |                 |                 |                 |                 |                           |                 |                 |                 |                 |                 |                                        |                   |                  |                    |                  |                  |                   |                  |                 |                 |                 |                 |                 |                 |
| Mineral                        |                             | H <sup>+</sup> -reaction                                                                                             |                   |                 |                 |                 |                 | H <sub>2</sub> O-reaction |                 |                 |                 |                 |                 | CO <sub>2</sub> -reaction              |                   | Organic acids    |                    |                  | OH-reaction      |                   |                  |                 |                 |                 |                 |                 |                 |
|                                |                             | pk <sub>H</sub>                                                                                                      | n <sub>H</sub>    | y <sub>Al</sub> | C <sub>Al</sub> | x <sub>BC</sub> | C <sub>BC</sub> | pk <sub>H2O</sub>         | y <sub>Al</sub> | C <sub>Al</sub> | x <sub>BC</sub> | C <sub>BC</sub> | Z <sub>Si</sub> | C <sub>Si</sub>                        | pk <sub>CO2</sub> | n <sub>CO2</sub> | pk <sub>Org</sub>  | n <sub>Org</sub> | C <sub>Org</sub> | pk <sub>OH-</sub> | w <sub>OH-</sub> | y <sub>Al</sub> | C <sub>Al</sub> | x <sub>BC</sub> | C <sub>BC</sub> | Z <sub>Si</sub> | C <sub>Si</sub> |
| 2.1                            | Monticellite                | 7.7                                                                                                                  | 0.55 <sup>6</sup> | 0.1             | 100             | 0.3             | 50              | >16.4                     | 0               | 100             | 0.2             | 50              | 16              | 900                                    | 15.4              | 0.6              | 13.9               | 0.5              | 5                | 13.3              | 0.6              | 0.1             | 100             | 0.2             | 60              | 14              | 900             |
| 2.2                            | Tephroite                   | 9.3                                                                                                                  | 0.56 <sup>6</sup> | 0.1             | 100             | 0.3             | 50              | >17.0                     | 0               | 100             | 0.2             | 50              | 16              | 900                                    | 15.4              | 0.6              | 13.9               | 0.5              | 5                | 13.3              | 0.6              | 0.1             | 100             | 0.2             | 60              | 14              | 900             |
| 2.3                            | Nepheline <sup>5</sup>      | 9.5                                                                                                                  | 1.0               | 0.4             | 10              | 0.4             | 10              | 14.4                      | 0.2             | 10              | 0.2             | 200             | 6               | 900                                    | 14.8              | 0.6              | 14.4               | 0.5              | 5                | 13.0              | 0.5              | 0.1             | 30              | 0.2             | 30              | 4               | 900             |
| 2.4                            | Anorthite <sup>6</sup> (An) | 10.3                                                                                                                 | 1.0               | 0.4             | 100             | 0.2             | 3               | 15.8                      | 0.15            | 100             | 0.2             | 200             | 6               | 900                                    | 16.4              | 0.6              | 14.7               | 0.5              | 5                | 13.7              | 0.25             | 0.1             | 30              | 0.2             | 30              | 4               | 900             |
| 2.5                            | Forsterite (Fo)             | 10.2                                                                                                                 | 1.0 <sup>6</sup>  | 0.1             | 1000            | 0.3             | 10              | 16.4                      | 0               | 5000            | 0.2             | 5               | 16              | 900                                    | 15.4 <sup>7</sup> | 0.6              | >13.9 <sup>6</sup> | 0.5              | 5                | 13.3              | 0.6              | 0.1             | 100             | 0.2             | 60              | 14              | 900             |

<sup>4</sup>There seems to be some type of CO<sub>2</sub> saturation of the surface between 10 and 50 atm CO<sub>2</sub> for mica and chlorites, beyond where the rate is no more affected. Some other minerals have indications of similar behaviour, but it remains elusive in terms of parameterization. Some minerals appear to have no detectable reaction with CO<sub>2</sub>, some are slightly inhibited.

<sup>5</sup>Nepheline is classified as a feldspatoid in the mineralogical literature. However, when dissolving, the pre-dissolution complexing process at the mineral water interface create an activated surface complex with a nesosilicate structure. Thus, a nesosilicate classification here.

<sup>6</sup>Anorthite is classified as a feldspar in the mineralogical literature. However, when dissolving pure anorthite, the pre-dissolution complexing process at the mineral water interface create an activated surface complex with a nesosilicate structure. This applied only to pure anorthite with less than 2% other feldspars in the solution. That is why it is listed among the nesosilicates. See Sverdrup (1990) for further details. This may be the case with Monticellite and Tephroite as well.

<sup>7</sup>According to Golubev et al., (2005) is the CO<sub>2</sub> reaction either very weak or absent, mostly from observations at high 5. For diopside and forsterite over the whole pH range (Golubev et al., 2005).

|      |                                                    |      |                  |      |      |     |     |       |      |      |     |     |    |     |                   |     |      |     |   |      |     |      |     |     |     |    |     |
|------|----------------------------------------------------|------|------------------|------|------|-----|-----|-------|------|------|-----|-----|----|-----|-------------------|-----|------|-----|---|------|-----|------|-----|-----|-----|----|-----|
| 2.6  | Olivine (Fo <sub>60</sub> Fa <sub>40</sub> )       | 12.0 | 1.0 <sup>8</sup> | 0.3  | 30   | 0.3 | 30  | >18.0 | 0.1  | 30   | 0.2 | 5   | 16 | 900 | 15.9 <sup>5</sup> | 0.6 | 14.7 | 0.5 | 5 | 15.4 | 0.6 | 0.1  | 100 | 0.2 | 60  | 14 | 900 |
| 2.7  | Fayalite (Fa)                                      | 10.2 | 1.0 <sup>6</sup> | 0.1  | 1000 | 0.3 | 50  | 16.4  | 0    | 5000 | 0.2 | 5   | 16 | 900 | 15.4              | 0.6 | 13.9 | 0.5 | 5 | 13.3 | 0.6 | 0.1  | 100 | 0.2 | 60  | 14 | 900 |
| 2.8  | Al <sub>44</sub> Py <sub>44</sub> Gr <sub>12</sub> | 12.4 | 1.0              | 0.4  | 300  | 0.2 | 50  | 16.9  | 0.2  | 300  | 0.2 | 500 | 8  | 900 | 15.8              | 0.6 | 14.7 | 0.5 | 5 | 14.9 | 0.2 | 0.12 | 100 | 0.2 | 100 | 6  | 900 |
| 2.9  | Al <sub>65</sub> Py <sub>35</sub>                  |      |                  |      |      |     |     |       |      |      |     |     |    |     |                   |     |      |     |   |      |     |      |     |     |     |    |     |
| 2.10 | Ad <sub>80</sub> Gr <sub>20</sub>                  |      |                  |      |      |     |     |       |      |      |     |     |    |     |                   |     |      |     |   |      |     |      |     |     |     |    |     |
| 2.11 | Al <sub>50</sub> Py <sub>40</sub> Gr <sub>10</sub> |      |                  |      |      |     |     |       |      |      |     |     |    |     |                   |     |      |     |   |      |     |      |     |     |     |    |     |
| 2.12 | Gr <sub>88</sub> Py <sub>6</sub> Ad <sub>6</sub>   |      |                  |      |      |     |     |       |      |      |     |     |    |     |                   |     |      |     |   |      |     |      |     |     |     |    |     |
| 2.13 | Grossular, (Gr)                                    | 12.4 | 1.0              | 0.4  | 200  | 0.2 | 40  | 16.9  | 0.2  | 200  | 0.2 | 300 | 8  | 900 | 15.8              | 0.6 | 14.7 | 0.5 | 5 | 14.9 | 0.2 | 0.12 | 60  | 0.2 | 60  | 6  | 900 |
| 2.14 | Andradite (Ad)                                     |      |                  |      |      |     |     |       |      |      |     |     |    |     |                   |     |      |     |   |      |     |      |     |     |     |    |     |
| 2.15 | Pyrope (Py)                                        |      |                  |      |      |     |     |       |      |      |     |     |    |     |                   |     |      |     |   |      |     |      |     |     |     |    |     |
| 2.16 | Almandine (Al)                                     |      |                  |      |      |     |     |       |      |      |     |     |    |     |                   |     |      |     |   |      |     |      |     |     |     |    |     |
| 2.17 | Uvarovite (Uv)                                     |      |                  |      |      |     |     |       |      |      |     |     |    |     |                   |     |      |     |   |      |     |      |     |     |     |    |     |
| 2.1  | Spessartite (Sp)                                   |      |                  |      |      |     |     |       |      |      |     |     |    |     |                   |     |      |     |   |      |     |      |     |     |     |    |     |
| 2.19 | Staurolite                                         | 14.7 | 1.0              | 0.4  | 200  | 0.2 | 20  | 17.4  | 0.2  | 200  | 0.3 | 5   | 16 | 900 | 15.2              | 0.6 | 14.4 | 0.5 | 5 | 17.1 | 0.3 | 0.12 | 60  | 0.2 | 60  | 14 | 900 |
| 2.20 | Disthene                                           | 15.5 | 1.0              | 0.33 | 10   | 0   | 500 | 17.0  | 0.33 | 10   | 0   | 500 | 4  | 900 | 16.5              | 0.5 | 15.6 | 0.5 | 5 | 15.8 | 0.4 | 0.1  | 400 | 0.3 | 60  | 3  | 900 |
| 2.21 | Kyanite                                            |      |                  |      |      |     |     |       |      |      |     |     |    |     |                   |     |      |     |   |      |     |      |     |     |     |    |     |

### 3. Pyroxenes<sup>9</sup> or single band inosilicates.

| Mineral |                 | H <sup>+</sup> -reaction |                |                 |                 |                 |                 | H <sub>2</sub> O-reaction |                 |                 |                 |                 |                 |                 | CO <sub>2</sub> -reaction |                  | Organic acids     |                  |                  | OH <sup>-</sup> -reaction |                  |                 |                 |                 |                 |                 |                 |     |  |
|---------|-----------------|--------------------------|----------------|-----------------|-----------------|-----------------|-----------------|---------------------------|-----------------|-----------------|-----------------|-----------------|-----------------|-----------------|---------------------------|------------------|-------------------|------------------|------------------|---------------------------|------------------|-----------------|-----------------|-----------------|-----------------|-----------------|-----------------|-----|--|
|         |                 | pk <sub>H</sub>          | n <sub>H</sub> | y <sub>Al</sub> | C <sub>Al</sub> | x <sub>BC</sub> | C <sub>BC</sub> | pk <sub>H2O</sub>         | y <sub>Al</sub> | C <sub>Al</sub> | x <sub>BC</sub> | C <sub>BC</sub> | z <sub>Si</sub> | C <sub>Si</sub> | pk <sub>CO2</sub>         | n <sub>CO2</sub> | pk <sub>Org</sub> | n <sub>Org</sub> | C <sub>Org</sub> | pk <sub>OH-</sub>         | w <sub>OH-</sub> | y <sub>Al</sub> | C <sub>Al</sub> | x <sub>BC</sub> | C <sub>BC</sub> | z <sub>Si</sub> | C <sub>Si</sub> |     |  |
| 3.1     | Alite           | 9.6                      | 0.67           | 0.2             | 1000            | 0.3             | 200             | 7.85                      | 0.1             | 400             | 0.3             | 5               | 16              | 900             | n.d                       | n.d              | n.d               | n.d              | n.d              | n.d                       | n.d              | n.d             | n.d             | n.d             | n.d             | n.d             | n.d             | n.d |  |
| 3.2     | Wollastonite    | 9.6                      | 0.7            | 0               | 5000            | 0.3             | 100             | 15.1                      | 0               | 5000            | 0.3             | 5               | 16              | 900             | 15.2                      | 0.6              | 13.5              | 0.5              | 5                | 11.6                      | 0.6              | 0               | 5000            | 0.5             | 5               | 8               | 900             |     |  |
| 3.3     | Spodumene       | 9.6                      | 0.7            | 0.2             | 400             | 0.3             | 200             | 17.2                      | 0.1             | 400             | 0.3             | 5               | 16              | 900             | 15.8                      | 0.6              | 14.2              | 0.5              | 5                | 14.6                      | 0.6              | 0.1             | 400             | 0.5             | 5               | 8               | 900             |     |  |
| 3.4     | Diopside        | 11.1                     | 0.67           | 0.2             | 400             | 0.35            | 150             | 14.9                      | 0.1             | 400             | 0.3             | 5               | 16              | 900             | >14.8 <sup>6</sup>        | 0.6              | 16.4              | 0.5              | 5                | 13.2                      | 0.6              | 0               | 400             | 0.5             | 5               | 8               | 900             |     |  |
| 3.5     | Jadeite         | 11.2                     | 0.7            | 0.2             | 400             | 0.35            | 150             | 14.5                      | 0.1             | 400             | 0.3             | 5               | 16              | 900             | 14.4                      | 0.6              | 14.0              | 0.5              | 5                | 12.9                      | 0.6              | 0               | 400             | 0.5             | 5               | 8               | 900             |     |  |
| 3.6     | Leucite         | 11.1                     | 0.4            | 0.2             | 400             | 0.35            | 150             | 14.5                      | 0.1             | 400             | 0.3             | 5               | 16              | 900             | 14.4                      | 0.6              | 14.0              | 0.5              | 5                | 12.9                      | 0.6              | 0               | 400             | 0.5             | 5               | 8               | 900             |     |  |
| 3.7     | Augite I        | 12.3                     | 0.7            | 0.2             | 500             | 0.3             | 200             | 17.5                      | 0.1             | 500             | 0.3             | 5               | 16              | 900             | 15.8                      | 0.6              | 14.4              | 0.5              | 5                | 14.8                      | 0.6              | 0.1             | 500             | 0.5             | 5               | 8               | 900             |     |  |
| 3.8     | Augite II       | 12.3                     | 0.7            | 0.2             | 500             | 0.3             | 200             | 17.5                      | 0.1             | 500             | 0.3             | 5               | 16              | 900             | 15.8                      | 0.6              | 14.4              | 0.5              | 5                | 14.8                      | 0.6              | 0.1             | 500             | 0.5             | 5               | 8               | 900             |     |  |
| 3.9     | Hedenbergite    | 12.8                     | 0.7            | 0.25            | 500             | 0.2             | 200             | 17.5                      | 0.16            | 500             | 0.3             | 5               | 16              | 900             | 15.8                      | 0.6              | 14.4              | 0.5              | 5                | 14.8                      | 0.6              | 0.1             | 500             | 0.5             | 5               | 8               | 900             |     |  |
| 3.10    | Augite II       | 13.8                     | 0.7            | 0.2             | 400             | 0.3             | 200             | 17.5                      | 0.1             | 400             | 0.3             | 5               | 16              | 900             | 15.8 <sup>5</sup>         | 0.6              | 14.4              | 0.5              | 5                | 14.8                      | 0.6              | 0.1             | 400             | 0.5             | 5               | 8               | 900             |     |  |
| 3.11    | Enstatite       | 13.0                     | 0.7            | 0.2             | 400             | 0.2             | 100             | 17.6                      | 0.1             | 400             | 0.3             | 5               | 16              | 900             | 15.8                      | 0.6              | 14.5              | 0.5              | 5                | 15.0                      | 0.6              | 0.1             | 400             | 0.5             | 5               | 8               | 900             |     |  |
| 3.12    | Hypersthene     | 13.2                     | 0.7            | 0.2             | 400             | 0.2             | 100             | 17.6                      | 0.1             | 400             | 0.3             | 5               | 16              | 900             | 15.8                      | 0.6              |                   | 0.5              | 5                |                           |                  | 0.1             | 400             | 0.5             | 5               | 8               | 900             |     |  |
| 3.13    | Ferrosilite     |                          |                | 0.2             | 400             | 0.3             | 200             |                           | 0.1             | 400             | 0.3             | 5               | 16              | 900             | 15.8 <sup>5</sup>         | 0.6              |                   | 0.5              | 5                |                           |                  | 0.1             | 400             | 0.5             | 5               | 8               | 900             |     |  |
|         |                 | 14.0                     | 0.7            |                 |                 |                 |                 | 17.7                      |                 |                 |                 |                 |                 |                 |                           |                  | 14.4              |                  |                  | 14.8                      | 0.6              |                 |                 |                 |                 |                 |                 |     |  |
| 3.14    | Bronzite        | 14.4                     | 0.7            | 0.2             | 400             | 0.2             | 200             | 17.5                      | 0.1             | 400             | 0.3             | 5               | 16              | 900             | 15.8                      | 0.6              | 14.4              | 0.5              | 5                | 14.8                      | 0.6              | 0.1             | 500             | 0.5             | 5               | 8               | 900             |     |  |
| 3.15    | Pidgeonite      | 13.8                     |                | 0.2             | 400             | 0.3             | 200             | 17.5                      | 0.1             | 400             | 0.3             | 5               | 16              | 900             | 15.8 <sup>5</sup>         | 0.6              | 14.4              | 0.5              | 5                | 14.8                      | 0.6              | 0.1             | 400             | 0.5             | 5               | 8               | 900             |     |  |
|         |                 |                          | 0.7            |                 |                 |                 |                 |                           |                 |                 |                 |                 |                 |                 |                           |                  |                   |                  |                  |                           |                  |                 |                 |                 |                 |                 |                 |     |  |
| 3.16    | Other pyroxenes | 14.0                     | 0.7            | 0.2             | 500             | 0.3             | 200             | 17.5                      | 0.1             | 500             | 0.3             | 5               | 16              | 900             | 15.8                      | 0.6              | 14.4              | 0.5              | 5                | 14.8                      | 0.6              | 0.1             | 500             | 0.5             | 5               | 8               | 900             |     |  |

### 4. Amphiboles or double band inosilicates

| Mineral |               | H <sup>+</sup> -reaction |                |                 |                 |                 |                 | H <sub>2</sub> O-reaction |                 |                 |                 |                 |                 | CO <sub>2</sub> -reaction |                    | Organic acids    |                   |                  | OH-reaction      |                  |                 |                 |                 |                 |                 |                 |                 |  |
|---------|---------------|--------------------------|----------------|-----------------|-----------------|-----------------|-----------------|---------------------------|-----------------|-----------------|-----------------|-----------------|-----------------|---------------------------|--------------------|------------------|-------------------|------------------|------------------|------------------|-----------------|-----------------|-----------------|-----------------|-----------------|-----------------|-----------------|--|
|         |               | pk <sub>H</sub>          | n <sub>H</sub> | y <sub>Al</sub> | C <sub>Al</sub> | x <sub>BC</sub> | C <sub>BC</sub> | pk <sub>H2O</sub>         | y <sub>Al</sub> | C <sub>Al</sub> | x <sub>BC</sub> | C <sub>BC</sub> | z <sub>Si</sub> | C <sub>Si</sub>           | pk <sub>CO2</sub>  | n <sub>CO2</sub> | pk <sub>Org</sub> | n <sub>Org</sub> | C <sub>Org</sub> | pk <sub>OH</sub> | w <sub>OH</sub> | y <sub>Al</sub> | C <sub>Al</sub> | x <sub>BC</sub> | C <sub>BC</sub> | z <sub>Si</sub> | C <sub>Si</sub> |  |
| 4.1     | Glaucofane    | 13.5                     | 0.7            | 0.3             | 5               | 0.3             | 5               | 16.7                      | 0.6             | 15              | 0.3             | 200             | 16              | 900                       | 16.1               | 0.6              | 14.7              | 0.5              | 5                | >16.7            | 0.3             | 0.15            | 400             | 0.5             | 60              | 8               | 900             |  |
| 4.2     | Pargasite     |                          |                | 0.3             | 5               | 0.3             | 5               |                           | 0.6             | 15              | 0.3             | 200             | 16              | 900                       | 16.1               | 0.6              | 14.7              | 0.5              | 5                | >16.7            | 0.3             | 0.15            | 400             | 0.5             | 60              | 8               | 900             |  |
|         |               | 13.8                     | 0.7            |                 |                 |                 |                 | 16.6                      |                 |                 |                 |                 |                 |                           |                    |                  |                   |                  |                  |                  |                 |                 |                 |                 |                 |                 |                 |  |
| 4.3     | Hornblende I  | 13.4                     | 0.7            | 0.4             | 5               | 0.3             | 5               | 16.3                      | 0.6             | 15              | 0.3             | 200             | 16              | 900                       | 15.9 <sup>5</sup>  | 0.6              | 14.4              | 0.5              | 5                | 17.5             | 0.1             | 0.15            | 400             | 0.5             | 60              | 8               | 900             |  |
| 4.4     | Hornblende II | 14.8                     | 0.6            | 0.3             | 5               | 0.3             | 5               | 16.5                      | 0.6             | 15              | 0.3             | 200             | 16              | 900                       | 16.1 <sup>15</sup> | 0.6              | 14.5              | 0.5              | 5                | 18.2             | 0.1             | 0.15            | 400             | 0.5             | 60              | 8               | 900             |  |

<sup>8</sup>A number of studies report this exponent to be 0.5. It was observed that all nesosilicates have reaction order n=1 in our own experiments, and in about half of all in the literature.

<sup>9</sup>He=Hedenbergite, En=Enstatite, Wo=Wollastonite, Di=Diopside, Au=Augite, Ja=Jadeite, Le=Leucite, Bz= Bronzite

|     |                  |      |      |     |   |     |   |      |     |    |     |     |    |     |      |     |      |     |   |      |     |      |     |     |    |   |     |
|-----|------------------|------|------|-----|---|-----|---|------|-----|----|-----|-----|----|-----|------|-----|------|-----|---|------|-----|------|-----|-----|----|---|-----|
| 4.5 | Tremolite        | 15.2 | 0.2  | 0.2 | 5 | 0.3 | 5 | 16.8 | 0.6 | 15 | 0.3 | 200 | 16 | 900 | 16.2 | 0.6 | 14.8 | 0.4 | 5 | 16.1 | 0.3 | 0.15 | 400 | 0.5 | 60 | 8 | 900 |
| 4.6 | Riebeckite       | 14.9 | 0.7  | 0.2 | 5 | 0.3 | 5 | 18.4 | 0.6 | 15 | 0.3 | 200 | 16 | 900 | 16.2 | 0.6 | 14.8 | 0.5 | 5 | 16.1 | 0.3 | 0.15 | 400 | 0.5 | 60 | 8 | 900 |
| 4.7 | Anthophyllite    | 13.8 | 0.25 | 0.2 | 5 | 0.3 | 5 | 18.4 | 0.6 | 15 | 0.3 | 200 | 16 | 900 | 16.2 | 0.6 | 14.9 | 0.1 | 5 | 16.4 | 0.1 | 0.2  | 400 | 0.5 | 60 | 8 | 900 |
| 4.8 | Other amphiboles | 14.8 | 0.6  | 0.3 | 5 | 0.3 | 5 | 16.5 | 0.6 | 15 | 0.3 | 200 | 16 | 900 | 16.1 | 0.6 | 14.5 | 0.5 | 5 | 18.2 | 0.1 | 0.15 | 400 | 0.5 | 60 | 8 | 900 |

#### 5. Phyllosilicates or sheet silicates

| Mineral |                                         | H <sup>+</sup> -reaction |                |                 |                 |                 |                 | H <sub>2</sub> O-reaction |                 |                 |                 |                 |                 | CO <sub>2</sub> -reaction |                   | Organic acids    |                   |                  | OH <sup>-</sup> -reaction |                   |                  |                 |                 |                 |                 |                 |                 |
|---------|-----------------------------------------|--------------------------|----------------|-----------------|-----------------|-----------------|-----------------|---------------------------|-----------------|-----------------|-----------------|-----------------|-----------------|---------------------------|-------------------|------------------|-------------------|------------------|---------------------------|-------------------|------------------|-----------------|-----------------|-----------------|-----------------|-----------------|-----------------|
|         |                                         | pk <sub>H</sub>          | n <sub>H</sub> | y <sub>Al</sub> | C <sub>Al</sub> | x <sub>BC</sub> | C <sub>BC</sub> | pk <sub>H2O</sub>         | y <sub>Al</sub> | C <sub>Al</sub> | x <sub>BC</sub> | C <sub>BC</sub> | Z <sub>Si</sub> | C <sub>Si</sub>           | pk <sub>CO2</sub> | n <sub>CO2</sub> | pk <sub>Org</sub> | n <sub>Org</sub> | C <sub>Org</sub>          | pk <sub>OH-</sub> | w <sub>OH-</sub> | y <sub>Al</sub> | C <sub>Al</sub> | x <sub>BC</sub> | C <sub>BC</sub> | Z <sub>Si</sub> | C <sub>Si</sub> |
| 5.1     | Glauconite                              | 11.8                     | 0.7            | 0.4             | 4               | 0.2             | 500             | 17.0                      | 0.2             | 50              | 0.1             | 200             | 16              | 900                       | 14.5              | 0.5              | 14.5              | 0.5              | 5                         | 15.5              | 0.4              | 0.15            | 400             | 0.3             | 60              | 14              | 200             |
| 5.2     | Serpentine,<br>Antigorite<br>Chrysotile | 12.7                     | 0.8            | 0.2             | 50              | 0.2             | 200             | 17.5                      | 0.1             | 50              | 0.1             | 200             | 16              | 900                       | 14.8              | 0.5              | >14.1             | 0.5              | 5                         | 17.8              | 0.6              | 0.15            | 400             | 0.3             | 60              | 14              | 200             |
| 5.3     | Talc                                    | 13.3                     | 0.7            | 0.2             | 50              | 0.2             | 200             | 16.7                      | 0.1             | 50              | 0.1             | 200             | 16              | 900                       | 14.5              | 0.5              | 14.5              | 0.5              | 5                         | 15.5              | 0.4              | 0.15            | 400             | 0.3             | 60              | 14              | 200             |
| 5.4     | Nontronite                              | 14.8                     | 0.3            | 0.2             | 30              | 0.2             | 20              | 16.5                      | 0.15            | 4               | 0.15            | 250             | 3               | 900                       | 16.05             | 0.6              | 14.7              | 0.5              | 5                         | 15.4              | 0.3              | 0.1             | 12              | 0.5             | 4               | 2               | 900             |
| 5.5     | Phlogopite                              | 14.8                     | 0.6            | 0.3             | 10              | 0.2             | 50              | 16.7                      | 0.2             | 10              | 0.2             | 500             | 6               | 900                       | 15.8              | 0.5              | 15.8              | 0.5              | 5                         | 15.8              | 0.5              | 0.15            | 400             | 0.3             | 60              | 5               | 900             |
| 5.6     | Biotite <sup>10</sup>                   | 14.8                     | 0.6            | 0.3             | 10              | 0.2             | 50              | 16.7                      | 0.2             | 10              | 0.2             | 500             | 6               | 900                       | 15.8              | 0.5              | 15.8              | 0.5              | 5                         | 15.8 <sup>5</sup> | 0.5              | 0.15            | 400             | 0.3             | 60              | 3               | 900             |
| 5.7     | Mg-Vermiculite <sup>14</sup>            | 14.8                     | 0.6            | 0.4             | 4               | 0.2             | 5               | 17.2                      | 0.1             | 4               | 0.1             | 500             | 4               | 900                       | 16.2              | 0.5              | 15.2              | 0.5              | 5                         | 15.8              | 0.5              | 0.15            | 400             | 0.3             | 60              | 3               | 50              |
| 5.8     | Mg-Vermiculite 2 <sup>4</sup>           | 14.8                     | 0.6            | 0.4             | 4               | 0.2             | 5               | 17.2                      | 0.1             | 4               | 0.1             | 500             | 4               | 900                       | 16.2              | 0.5              | 15.2              | 0.5              | 5                         | 15.8              | 0.5              | 0.15            | 400             | 0.3             | 60              | 3               | 50              |
| 5.9     | Mg-Vermiculite 3 <sup>4</sup>           | 14.8                     | 0.6            | 0.4             | 4               | 0.2             | 5               | 17.2                      | 0.1             | 4               | 0.1             | 500             | 4               | 900                       | 16.2              | 0.5              | 15.2              | 0.5              | 5                         | 18.8              | 0.5              | 0.15            | 400             | 0.3             | 60              | 3               | 50              |
| 5.10    | Fe-vermiculite                          | 15.2                     | 0.6            | 0.4             | 4               | 0.2             | 50              | 17.6                      | 0.1             | 4               | 0.2             | 200             | 3               | 900                       | 16.5              | 0.5              | 15.2              | 0.5              | 5                         | 18.8              | 0.5              | 0.15            | 400             | 0.3             | 60              | 3               | 50              |
| 5.11    | Illitic vermiculite                     | 15.0                     | 0.6            | 0.4             | 4               | 0.2             | 5               | 17.3                      | 0.1             | 4               | 0.1             | 500             | 4               | 900                       | 16.5              | 0.5              | 15.5              | 0.5              | 5                         | 17.0              | 0.5              | 0.15            | 400             | 0.3             | 60              | 3               | 50              |
| 5.12    | Vermiculite Al-OH<br>interlayer mineral | 15.2                     | 0.5            | 0.4             | 4               | 0.1             | 5               | 17.5                      | 0.2             | 4               | 0.1             | 500             | 6               | 900                       | 16.5              | 0.5              | 15.6              | 0.5              | 5                         | 17.2              | 0.4              | 0.15            | 400             | 0.3             | 60              | 5               | 100             |
| 5.13    | Fe-Chlorite                             | 14.8                     | 0.7            | 0.2             | 50              | 0.2             | 5               | 17.0                      | 0.1             | 50              | 0.1             | 200             | 4               | 900                       | 16.2              | 0.5              | 15.0              | 0.5              | 5                         | 18.3              | 0.4              | 0.15            | 400             | 0.3             | 60              | 3               | 50              |
| 5.14    | Chlorite                                | 14.8                     | 0.5            | 0.2             | 50              | 0.2             | 5               | 17.0                      | 0.1             | 50              | 0.1             | 200             | 4               | 900                       | 16.2              | 0.5              | 12.6              | 0.5              | 5                         | 18.0              | 0.4              | 0.15            | 400             | 0.3             | 60              | 3               | 50              |
| 5.15    | Mg-Chlorite                             | 14.3                     | 0.7            | 0.2             | 50              | 0.2             | 200             | 16.7                      | 0.1             | 50              | 0.1             | 200             | 4               | 900                       | 15.8              | 0.5              | 14.5              | 0.5              | 5                         | 18.0              | 0.4              | 0.15            | 400             | 0.3             | 60              | 3               | 50              |
| 5.16    | Smectites <sup>11</sup>                 | 14.9                     | 0.5            | 0.4             | 4               | 0.2             | 500             | 17.6                      | 0.2             | 4               | 0.1             | 50              | 4               | 900                       | 16.5              | 0.5              | 15.6              | 0.5              | 5                         | 17.5              | 0.5              | 0.1             | 400             | 0.3             | 60              | 3               | 50              |
| 5.17    | Muscovite <sup>3</sup>                  | 15.2                     | 0.5            | 0.4             | 4               | 0.1             | 5               | 17.5                      | 0.2             | 4               | 0.1             | 500             | 12              | 900                       | 16.5              | 0.5              | 15.3              | 0.5              | 5                         | 17.2              | 0.4              | 0.15            | 400             | 0.3             | 60              | 10              | 100             |
| 5.18    | Mixed muscovites                        | 15.1                     | 0.5            | 0.4             | 4               | 0.1             | 5               | 17.5                      | 0.2             | 4               | 0.1             | 500             | 12              | 900                       | 16.5              | 0.5              | 15.3              | 0.5              | 5                         | 17.2              | 0.4              | 0.15            | 400             | 0.3             | 60              | 10              | 100             |
| 5.19    | Illite 1 <sup>12</sup>                  | 15.0                     | 0.5            | 0.4             | 4               | 0.1             | 5               | 17.5                      | 0.2             | 4               | 0.1             | 500             | 3               | 900                       | 16.5              | 0.5              | 15.4              | 0.5              | 5                         | 17.2              | 0.4              | 0.15            | 400             | 0.3             | 60              | 2               | 100             |
| 5.20    | Illite 2 <sup>3</sup>                   | 15.2                     | 0.5            | 0.4             | 4               | 0.1             | 5               | 17.5                      | 0.2             | 4               | 0.1             | 500             | 3               | 900                       | 16.5              | 0.5              | 15.6              | 0.5              | 5                         | 17.2              | 0.4              | 0.15            | 400             | 0.3             | 60              | 2               | 100             |
| 5.21    | Illite 3 <sup>3</sup>                   | 15.2                     | 0.5            | 0.4             | 4               | 0.1             | 5               | 17.5                      | 0.2             | 4               | 0.1             | 500             | 3               | 900                       | 16.5              | 0.5              | 15.8              | 0.5              | 5                         | 17.2              | 0.4              | 0.15            | 400             | 0.3             | 60              | 2               | 100             |
| 5.22    | Bentonite                               | 15.1                     | 0.5            | 0.4             | 4               | 0.2             | 500             | 17.6                      | 0.2             | 4               | 0.1             | 50              | 4               | 900                       | 16.5              | 0.5              | 15.6              | 0.5              | 5                         | 17.5              | 0.5              | 0.1             | 400             | 0.3             | 60              | 3               | 50              |
| 5.23    | Montmorillonite                         | 15.1                     | 0.5            | 0.4             | 4               | 0.2             | 500             | 17.6                      | 0.2             | 4               | 0.1             | 50              | 4               | 900                       | 16.5              | 0.5              | 15.6              | 0.5              | 5                         | 17.5              | 0.5              | 0.1             | 400             | 0.3             | 60              | 3               | 50              |
| 5.24    | Sericite                                | 15.2                     | 0.5            | 0.4             | 4               | 0.1             | 5               | 17.5                      | 0.2             | 4               | 0.1             | 500             | 3               | 900                       | 16.5              | 0.5              | 15.6              | 0.5              | 5                         | 17.2              | 0.4              | 0.15            | 400             | 0.3             | 60              | 2               | 100             |

#### 6. Cyclosilicates

| Mineral |            | H <sup>+</sup> -reaction |                |                 |                 |                 |                 | H <sub>2</sub> O-reaction |                 |                 |                 |                 |                 | CO <sub>2</sub> -reaction |                   | Organic acids    |                   |                  | OH <sup>-</sup> -reaction |                   |                  |                 |                 |                 |                 |                 |                 |
|---------|------------|--------------------------|----------------|-----------------|-----------------|-----------------|-----------------|---------------------------|-----------------|-----------------|-----------------|-----------------|-----------------|---------------------------|-------------------|------------------|-------------------|------------------|---------------------------|-------------------|------------------|-----------------|-----------------|-----------------|-----------------|-----------------|-----------------|
|         |            | pk <sub>H</sub>          | n <sub>H</sub> | y <sub>Al</sub> | C <sub>Al</sub> | x <sub>BC</sub> | C <sub>BC</sub> | pk <sub>H2O</sub>         | y <sub>Al</sub> | C <sub>Al</sub> | x <sub>BC</sub> | C <sub>BC</sub> | z <sub>Si</sub> | C <sub>Si</sub>           | pk <sub>CO2</sub> | n <sub>CO2</sub> | pk <sub>Org</sub> | n <sub>Org</sub> | C <sub>Org</sub>          | pk <sub>OH-</sub> | w <sub>OH-</sub> | y <sub>Al</sub> | C <sub>Al</sub> | x <sub>BC</sub> | C <sub>BC</sub> | z <sub>Si</sub> | C <sub>Si</sub> |
| 6.1     | Tourmaline | <b>13.2</b>              | <b>1.0</b>     | 0.3             | 200             | 0.2             | 200             | <b>15.4</b>               | 0.2             | 200             | 0.3             | 100             | 8               | 900                       | 14.8              | 0.6              | 14.4              | 0.5              | 5                         | <b>&gt;17.0</b>   | 0.5              | 0.15            | 400             | 0.3             | 60              | 8               | 30              |
| 6.2     | Cordierite | <b>15.4</b>              | <b>1.0</b>     | 0.3             | 200             | 0.2             | 200             | <b>16.5</b>               | 0.2             | 200             | 0.3             | 100             | 8               | 900                       | 15.9              | 0.6              | 15.5              | 0.5              | 5                         | <b>17.4</b>       | <b>0.5</b>       | 0.15            | 400             | 0.3             | 60              | 8               | 30              |

#### 7. Sorosilicates

| Mineral | H <sup>+</sup> -reaction |                |                 |                 |                 |                 | H <sub>2</sub> O-reaction |                 |                 |                 |                 |                 | CO <sub>2</sub> -reaction |                   | Organic acids    |                   |                  | OH <sup>-</sup> -reaction |                   |                  |                 |                 |                 |                 |                 |
|---------|--------------------------|----------------|-----------------|-----------------|-----------------|-----------------|---------------------------|-----------------|-----------------|-----------------|-----------------|-----------------|---------------------------|-------------------|------------------|-------------------|------------------|---------------------------|-------------------|------------------|-----------------|-----------------|-----------------|-----------------|-----------------|
|         | pk <sub>H</sub>          | n <sub>H</sub> | v <sub>Al</sub> | c <sub>Al</sub> | x <sub>BC</sub> | c <sub>BC</sub> | pk <sub>H2O</sub>         | v <sub>Al</sub> | c <sub>Al</sub> | x <sub>BC</sub> | c <sub>BC</sub> | z <sub>Si</sub> | c <sub>Si</sub>           | pk <sub>CO2</sub> | n <sub>CO2</sub> | pk <sub>Org</sub> | n <sub>Org</sub> | c <sub>Org</sub>          | pk <sub>OH-</sub> | w <sub>OH-</sub> | v <sub>Al</sub> | c <sub>Al</sub> | x <sub>BC</sub> | c <sub>BC</sub> | z <sub>Si</sub> |

<sup>10</sup>All biotite and vermiculites have the same lattice breakdown rate (Sverdrup and Holmqvist 2004), the release rate results from the combination of lattice breakdown kinetics and the mineral stoichiometry

<sup>11</sup>All smectites, including montmorillonites and bentonites have the same lattice breakdown rate (Sverdrup and Holmqvist 2004), the release rate results from the combination of lattice breakdown kinetics and the mineral stoichiometry

<sup>12</sup>All muscovite and illites have the same lattice breakdown rate (Sverdrup and Holmqvist 2004), the release rate results from the combination of lattice breakdown kinetics and the mineral stoichiometry.

|                                |                                 |                          |                |                 |                 |                 |                           |                   |                 |                 |                 |                           |                 |                 |                   |                  |                   |                  |                  |                  |                 |                 |                 |                 |                 |                 |                 |
|--------------------------------|---------------------------------|--------------------------|----------------|-----------------|-----------------|-----------------|---------------------------|-------------------|-----------------|-----------------|-----------------|---------------------------|-----------------|-----------------|-------------------|------------------|-------------------|------------------|------------------|------------------|-----------------|-----------------|-----------------|-----------------|-----------------|-----------------|-----------------|
| 7.1                            | Epidote (Ep)                    | <b>14.0</b>              | <b>0.8</b>     | <b>0.3</b>      | <b>50</b>       | <b>0.2</b>      | <b>5</b>                  | <b>17.7</b>       | <b>0.2</b>      | 50              | <b>0.2</b>      | <b>20</b>                 | 32              | 900             | 16.2              | 0.5              | 14.4              | 0.5              | 5                | <b>18.4</b>      | 0.2             | 0.15            | 400             | 0.3             | 60              | 32              | 200             |
| 7.2                            | Zoisite (Zo)                    | <b>15.2</b>              | <b>0.5</b>     | <b>0.2</b>      | 50              | 0.2             | 5                         | 17.4              | 0.2             | 200             | 0.2             | 20                        | 32              | 900             | 16.3              | 0.5              | 14.7              | 0.5              | 5                | 17.2             | 0.3             | 0.15            | 400             | 0.3             | 60              | 32              | 200             |
| 7.3                            | Other zoisites                  | 15.2                     | 0.5            | 0.2             | 50              | 0.2             | 5                         | 17.4              | 0.2             | 200             | 0.2             | 20                        | 32              | 900             | 16.3              | 0.5              | 14.7              | 0.5              | 5                | 17.2             | 0.3             | 0.15            | 400             | 0.3             | 60              | 32              | 200             |
| 8. Aluminosilicates and quartz |                                 |                          |                |                 |                 |                 |                           |                   |                 |                 |                 |                           |                 |                 |                   |                  |                   |                  |                  |                  |                 |                 |                 |                 |                 |                 |                 |
|                                |                                 | H <sup>+</sup> -reaction |                |                 |                 |                 | H <sub>2</sub> O-reaction |                   |                 |                 |                 | CO <sub>2</sub> -reaction |                 | Organic acids   |                   |                  | OH-reaction       |                  |                  |                  |                 |                 |                 |                 |                 |                 |                 |
|                                |                                 | pk <sub>H</sub>          | n <sub>H</sub> | y <sub>Al</sub> | C <sub>Al</sub> | x <sub>BC</sub> | C <sub>BC</sub>           | pk <sub>H2O</sub> | y <sub>Al</sub> | C <sub>Al</sub> | x <sub>BC</sub> | C <sub>BC</sub>           | z <sub>Si</sub> | C <sub>Si</sub> | pk <sub>CO2</sub> | n <sub>CO2</sub> | pk <sub>Org</sub> | n <sub>Org</sub> | C <sub>Org</sub> | pk <sub>OH</sub> | w <sub>OH</sub> | y <sub>Al</sub> | C <sub>Al</sub> | x <sub>BC</sub> | C <sub>BC</sub> | z <sub>Si</sub> | C <sub>Si</sub> |
| 8.1                            | Kaolinite                       | <b>15.1</b>              | <b>0.7</b>     | 0.4             | 4               | 0.4             | 5                         | 17.6              | 0.2             | 5               | 0.4             | 50                        | 2               | 900             | 16.5              | 0.5              | <b>19.5</b>       | <b>0.5</b>       | 5                | <b>&gt;15.1</b>  | 0.6             | 0.15            | 400             | 0.3             | 60              | 1               | 900             |
| 8.2                            | Gibbsite                        | <b>13.9</b>              | <b>1.0</b>     | 0.5             | 5               | 0               | 500                       | 16.4              | 0.2             | 5               | 0.4             | 0                         | n.a.            | n.a.            | >18.0             | 0.5              | 16.3              | 0.5              | 5                | <b>&gt;13.4</b>  | 1.0             | 0               | 5               | 0               | 5000            | n.a.            | n.a.            |
| 8.3                            | Quartz                          | <b>18.4</b>              | <b>0.3</b>     | 0.3             | 5               | 0               | 500                       | >17.8             | 0               | 5               | 0               | 5000                      | 4               | 900             | >18.0             | 0.5              | <b>16.3</b>       | <b>0.5</b>       | 5                | <b>14.1</b>      | 0.3             | 0.4             | 200             | 0               | 5000            | 1               | 900             |
| 9. Volcanic glasses            |                                 |                          |                |                 |                 |                 |                           |                   |                 |                 |                 |                           |                 |                 |                   |                  |                   |                  |                  |                  |                 |                 |                 |                 |                 |                 |                 |
| Mineral                        |                                 | H <sup>+</sup> -reaction |                |                 |                 |                 | H <sub>2</sub> O-reaction |                   |                 |                 |                 | CO <sub>2</sub> -reaction |                 | Organic acids   |                   |                  | OH-reaction       |                  |                  |                  |                 |                 |                 |                 |                 |                 |                 |
|                                |                                 | pk <sub>H</sub>          | n <sub>H</sub> | y <sub>Al</sub> | C <sub>Al</sub> | x <sub>BC</sub> | C <sub>BC</sub>           | pk <sub>H2O</sub> | y <sub>Al</sub> | C <sub>Al</sub> | x <sub>BC</sub> | C <sub>BC</sub>           | z <sub>Si</sub> | C <sub>Si</sub> | pk <sub>CO2</sub> | n <sub>CO2</sub> | pk <sub>Org</sub> | n <sub>Org</sub> | C <sub>Org</sub> | pk <sub>OH</sub> | w <sub>OH</sub> | y <sub>Al</sub> | C <sub>Al</sub> | x <sub>BC</sub> | C <sub>BC</sub> | z <sub>Si</sub> | C <sub>Si</sub> |
| 9.1                            | Base cation poor volcanic glass | <b>15.2</b>              | <b>0.5</b>     | 0.4             | 5               | 0.1             | 300                       | 18.2              | 0.1             | 5               | 0               | 50                        | 2               | 900             | 17.9 <sup>5</sup> | 0.5              | <b>15.7</b>       | <b>0.5</b>       | 5                | <b>15.7</b>      | <b>0.25</b>     | 0.25            | 5               | 0.3             | 60              | 2               | 900             |
| 9.2                            | Base cation rich volcanic glass | <b>15.2</b>              | <b>0.5</b>     | 0.4             | 5               | 0.1             | 300                       | 18.2              | 0.1             | 5               | 0               | 50                        | 2               | 900             | 17.9 <sup>5</sup> | 0.5              | 19.5              | 0.5              | 5                | <b>15.8</b>      | <b>0.25</b>     | 0.25            | 5               | 0.3             | 60              | 2               | 900             |
| 9.3                            | Other glasses                   | 15.2                     | 0.5            | 0.4             | 5               | 0.1             | 300                       | 18.2              | 0.1             | 5               | 0               | 50                        | 2               | 900             | 17.9              | 0.5              | 19.5              | 0.5              | 5                | <b>15.8</b>      | <b>0.25</b>     | 0.25            | 5               | 0.3             | 60              | 2               | 900             |
| 10. Carbonates                 |                                 |                          |                |                 |                 |                 |                           |                   |                 |                 |                 |                           |                 |                 |                   |                  |                   |                  |                  |                  |                 |                 |                 |                 |                 |                 |                 |
| Mineral                        |                                 | H <sup>+</sup> -reaction |                |                 |                 |                 | H <sub>2</sub> O-reaction |                   |                 |                 |                 | CO <sub>2</sub> -reaction |                 | Organic acids   |                   |                  | OH-reaction       |                  |                  |                  |                 |                 |                 |                 |                 |                 |                 |
|                                |                                 | pk <sub>H</sub>          | n <sub>H</sub> | y <sub>Al</sub> | C <sub>Al</sub> | x <sub>BC</sub> | C <sub>BC</sub>           | pk <sub>H2O</sub> | y <sub>Al</sub> | C <sub>Al</sub> | x <sub>BC</sub> | C <sub>BC</sub>           | z <sub>Si</sub> | C <sub>Si</sub> | pk <sub>CO2</sub> | n <sub>CO2</sub> | pk <sub>Org</sub> | n <sub>Org</sub> | C <sub>Org</sub> | pk <sub>OH</sub> | w <sub>OH</sub> | y <sub>Al</sub> | C <sub>Al</sub> | x <sub>BC</sub> | C <sub>BC</sub> | z <sub>Si</sub> | C <sub>Si</sub> |
| 10.1                           | Calcite <sup>13</sup>           | <b>13.6</b>              | <b>1.0</b>     | <b>0</b>        | <b>5000</b>     | <b>0.4</b>      | <b>5</b>                  | <b>14.2</b>       | <b>0</b>        | <b>5000</b>     | <b>0.2</b>      | <b>1000</b>               | 16              | 900             | <b>13.2</b>       | <b>0.6</b>       | <b>13.2</b>       | <b>0.5</b>       | <b>5</b>         | <b>0</b>         | <b>0</b>        | <b>0</b>        | <b>5000</b>     | <b>0</b>        | <b>5000</b>     | 16              | 900             |
| 10.2                           | Aragonite                       | <b>13.6</b>              | <b>1.0</b>     | 0               | 5000            | 0.4             | 5                         | <b>14.6</b>       | 0               | 5000            | 0.2             | 1000                      | 16              | 900             | <b>13.4</b>       | 0.6              | <b>13.4</b>       | 0.5              | 5                | 0                | 0               | 0               | 5000            | 0               | 5000            | 16              | 900             |
| 10.3                           | Dolomite                        | <b>11.1</b>              | <b>0.5</b>     | <b>0</b>        | <b>3000</b>     | <b>0.4</b>      | <b>5</b>                  | <b>17.5</b>       | <b>0</b>        | <b>3000</b>     | <b>0.2</b>      | <b>10</b>                 | 4               | 900             | <b>14.8</b>       | <b>0.6</b>       | <b>14.4</b>       | <b>0.5</b>       | <b>5</b>         | <b>0</b>         | <b>0</b>        | <b>0</b>        | <b>5000</b>     | <b>0</b>        | <b>5000</b>     | 4               | 900             |
| 10.4                           | Magnesite                       | <b>13.1</b>              | <b>0.5</b>     | <b>0</b>        | <b>3000</b>     | <b>0.4</b>      | <b>5</b>                  | <b>17.6</b>       | <b>0</b>        | <b>3000</b>     | <b>0.2</b>      | <b>5</b>                  | 3               | 900             | 14.8              | 0.6              | 14.4              | 0.5              | 5                | 0                | 0               | 0               | 5000            | 0               | 5000            | 3               | 900             |
| 10.5                           | Siderite <sup>14</sup>          | 15.4                     | 0.74           | 0               | 3000            | 0.4             | 5                         | 18.8              | 0               | 3000            | 0.2             | 10                        | 8               | 900             | 14.8              | 0.6              | 14.4              | 0.5              | 5                | 0                | 0               | 0               | 5000            | 0               | 5000            | 4               | 900             |
| 10.6                           | Rhodochrosite <sup>11</sup>     | 15.6                     | 0.67           | 0               | 3000            | 0.4             | 5                         | 18.6              | 0               | 3000            | 0.2             | 10                        | 8               | 900             | 14.6              | 0.6              | 14.2              | 0.5              | 5                | 0                | 0               | 0               | 5000            | 0               | 5000            | 4               | 900             |
| 11. Phosphates                 |                                 |                          |                |                 |                 |                 |                           |                   |                 |                 |                 |                           |                 |                 |                   |                  |                   |                  |                  |                  |                 |                 |                 |                 |                 |                 |                 |
| Mineral                        |                                 | H <sup>+</sup> -reaction |                |                 |                 |                 | H <sub>2</sub> O-reaction |                   |                 |                 |                 | CO <sub>2</sub> -reaction |                 | Organic acids   |                   |                  | OH-reaction       |                  |                  |                  |                 |                 |                 |                 |                 |                 |                 |
|                                |                                 | pk <sub>H</sub>          | n <sub>H</sub> | y <sub>Al</sub> | C <sub>Al</sub> | x <sub>BC</sub> | C <sub>BC</sub>           | pk <sub>H2O</sub> | y <sub>Al</sub> | C <sub>Al</sub> | x <sub>BC</sub> | C <sub>BC</sub>           | z <sub>Si</sub> | C <sub>Si</sub> | pk <sub>CO2</sub> | n <sub>CO2</sub> | pk <sub>Org</sub> | n <sub>Org</sub> | C <sub>Org</sub> | pk <sub>OH</sub> | w <sub>OH</sub> | y <sub>Al</sub> | C <sub>Al</sub> | x <sub>BC</sub> | C <sub>BC</sub> | z <sub>Si</sub> | C <sub>Si</sub> |
| 11.1                           | Apatite <sup>15</sup>           | <b>12.8</b>              | <b>0.67</b>    | <b>0</b>        | -               | <b>0.4</b>      | <b>100</b>                | <b>16.1</b>       | 0.2             | 20              | <b>0.4</b>      | <b>50</b>                 | n.a.            | n.a.            | <b>15.8</b>       | <b>0.6</b>       | <b>19.5</b>       | <b>0.5</b>       | <b>5</b>         | <b>12.8</b>      | <b>0.6</b>      | <b>0.15</b>     | 400             | 0.3             | 60              | n.a.            | n.a.            |
| 11.2                           | Fluoroapatite                   | 12.8                     | 0.7            | 0               | -               | 0.4             | 100                       | 15.9              | 0.2             | 20              | 0.4             | 50                        | n.a.            | n.a.            | 15.8              | 0.5              | 19.5              | 0.5              | 5                | 12.8             | 0.5             | 0.15            | 400             | 0.3             | 60              | n.a.            | n.a.            |
| 11.3                           | Other soil phosphorus solids    | 12.8                     | 0.7            | 0               | -               | 0.4             | 100                       | 15.8              | 0.2             | 20              | 0.4             | 50                        | n.a.            | n.a.            | 15.8              | 0.5              | 19.5              | 0.5              | 5                | <b>12.8</b>      | <b>0.5</b>      | 0.15            | 400             | 0.3             | 60              | n.a.            | n.a.            |

Table 4. Temperature dependencies, measured are in bold. Default values were computed and scaled with Madelung crystal lattice site energy from Garnet (Sverdrup 1990). Normal font means we have estimated it from the lattice energies and the properties of the mineral surface. Based on the modified Arrhenius equation (Sverdrup 1990, 1998, Sverdrup and Warfvinge 1988, 1992, 1995).

| Mineral | Fundamental chemical reactions |                  |                 |               |                 | Comments |
|---------|--------------------------------|------------------|-----------------|---------------|-----------------|----------|
|         | H <sup>+</sup>                 | H <sub>2</sub> O | CO <sub>2</sub> | Organic acids | OH <sup>-</sup> |          |

<sup>13</sup>This is a general calcite. Accurate kinetic data are available for 8 different Swedish and 6 different American commercially available calcites, and 4 different Swedish, English, Finnish and Estonian dolomites (See Sverdrup and Bjerle 1983).

<sup>14</sup>Siderite and rhodochrosite have strong inhibition of the water reaction by dissolved oxygen in the solution.

<sup>15</sup>Apatite dissolution is retarded at all pH by oxalate concentrations and the presence of aluminium and iron. Silica seems to interfere less with the rate of dissolution.

| 1. Feldspars       |                                           |      |      |      |      |      |                          |
|--------------------|-------------------------------------------|------|------|------|------|------|--------------------------|
| 1.1-1.2            | K-Feldspar I; Orthoclase, Sanidine        | 3500 | 1940 | 1700 | 1200 | 3200 | Irreversible dissolution |
| 1.3                | K-Feldspar II; Microcline                 | 3470 | 1820 | 1700 | 1200 | 3200 | Irreversible dissolution |
| 1.4                | K-Feldspar III; Orthoclase                | 4090 | 2000 | 1700 | 1200 | 3500 | Irreversible dissolution |
| 1.5                | Anorthoclase                              | 3500 | 2000 | 1700 | 1200 | 3200 | Irreversible dissolution |
| 1.6                | Plagioclase; Albite                       | 3350 | 2500 | 1680 | 1200 | 3100 | Irreversible dissolution |
| 1.7                | Plagioclase; Oligoclase                   | 4200 | 2330 | 1700 | 1200 | 3600 | Irreversible dissolution |
| 1.8                | Plagioclase; Labradorite                  | 4200 | 2500 | 1700 | 2200 | 3500 | Irreversible dissolution |
| 1.9-1.10           | Plagioclase; Bytownite and near anorthite | 3500 | 2500 | 1700 | 1200 | 3100 | Irreversible dissolution |
| 1.11               | All other feldspars                       | 3685 | 2085 | 1690 | 1200 | 3100 | Irreversible dissolution |
| 1b. Zeolites       |                                           |      |      |      |      |      |                          |
| 1.12               | Helulandite                               | 3500 | 2550 | 1700 | 1200 | 3450 | Irreversible dissolution |
| 1.13               | Analcime                                  | 3500 | 2500 | 1700 | 1200 | 3400 | Reversible reaction      |
| 1.14               | Clinoptilolite                            | 3500 | 2550 | 1700 | 1200 | 3600 | Irreversible dissolution |
| 1.15               | Stilbite                                  | 3500 | 2500 | 1700 | 1200 | 3400 | Irreversible dissolution |
| 2. Nesosilicates   |                                           |      |      |      |      |      |                          |
| 2.1                | Monticellite                              | 3480 | 4200 | 1700 | 1600 | 2200 | Irreversible dissolution |
| 2.2                | Tephroite                                 | 2551 | 4400 | 1700 | 1534 | 1450 | Irreversible dissolution |
| 2.4                | Anorthite (An)                            | 1820 | 5670 | 1700 | 1800 | 1700 | Irreversible dissolution |
| 2.5                | Forsterite (Fo)                           | 3350 | 4510 | 1700 | 1800 | 2100 | Irreversible dissolution |
| 2.6                | Olivine                                   | 2580 | 4510 | 1700 | 1800 | 2100 | Irreversible dissolution |
| 2.7                | Fayalite                                  | 2550 | 4400 | 1700 | 1800 | 2200 | Irreversible dissolution |
| 2.13               | Nepheline                                 | 3630 | 3130 | 1700 | 1800 | 2180 | Irreversible dissolution |
| 2.8-2.18           | Garnet mixes, all garnets                 | 2500 | 3500 | 1700 | 1800 | 2000 | Irreversible dissolution |
| 2.19               | Staurolite                                | 3100 | 3200 | 1700 | 1800 | 3100 | Irreversible dissolution |
| 2.20-2.21          | Disthene, Kyanite                         | 3918 | 2400 | 1700 | 1800 | 2200 | Irreversible dissolution |
| 2.22               | All other nesosilicates                   | 2676 | 4436 | 1700 | 1800 | 2180 | Irreversible dissolution |
| 4. Pyroxenes       |                                           |      |      |      |      |      |                          |
| 3.2                | Wollastonite                              | 3100 | 3600 | 1700 | 2000 | 2100 | Irreversible dissolution |
| 3.4                | Diopside                                  | 2610 | 3400 | 1700 | 2000 | 2000 | Irreversible dissolution |
| 3.9                | Hedenbergite                              | 2311 | 3500 | 1700 | 2000 | 2000 | Irreversible dissolution |
| 3.7-3.8, 3.10      | Augite                                    | 2700 | 4100 | 1700 | 2000 | 2000 | Irreversible dissolution |
| 3.11               | Enstatite                                 | 2550 | 5950 | 1700 | 2000 | 2000 | Irreversible dissolution |
| 3.16               | All other pyroxenes                       | 2700 | 4100 | 1700 | 2000 | 2000 | Irreversible dissolution |
| 4. Amphiboles      |                                           |      |      |      |      |      |                          |
| 4.1                | Glaucophane                               | 4300 | 3800 | 1700 | 2000 | 3500 | Irreversible dissolution |
| 4.2                | Hornblende I                              | 4300 | 3800 | 1700 | 2000 | 3500 | Irreversible dissolution |
| 4.3                | Hornblende II                             | 4300 | 4000 | 1800 | 2200 | 3500 | Irreversible dissolution |
| 4.4                | Tremolite                                 | 4500 | 3390 | 1700 | 2000 | 3600 | Irreversible dissolution |
| 4.5                | Antophyllite                              | 3800 | 3300 | 1700 | 2200 | 4500 | Irreversible dissolution |
| 4.6                | All other amphiboles                      | 4300 | 3390 | 1700 | 2000 | 3500 | Irreversible dissolution |
| 5. Phyllosilicates |                                           |      |      |      |      |      |                          |
| 5.1                | Glauconite                                | 4300 | 1950 | 1700 | 2000 | 3500 | Irreversible dissolution |
| 5.2                | Serpentine,                               | 4282 | 3600 | 1700 | 2000 | 3500 | Irreversible dissolution |



|                                        |                                                        |             |             |             |             |             |                                                                             |
|----------------------------------------|--------------------------------------------------------|-------------|-------------|-------------|-------------|-------------|-----------------------------------------------------------------------------|
|                                        | Chrysotile, Antigorite                                 |             |             |             |             |             |                                                                             |
| 5.3                                    | Talc                                                   | <b>4200</b> | <b>3700</b> | 1700        | 2000        | 3500        | Irreversible dissolution                                                    |
| 5.4                                    | Nontronite                                             | 4500        | 3500        | 1700        | 1200        | 3400        | Irreversible dissolution                                                    |
| 5.6                                    | Biotite                                                | <b>4500</b> | <b>3840</b> | 1700        | 2000        | 3500        | Irreversible dissolution                                                    |
| 5.5                                    | Phlogopite                                             | 4500        | 3840        | 1700        | 2000        | 3500        | Irreversible dissolution                                                    |
| 5.7                                    | Vermiculite 1                                          | 4500        | 3840        | 1700        | 2000        | 3500        | Alteration mineral, irreversible dissolution                                |
| 5.8                                    | Vermiculite 2                                          | 4500        | 3840        | 1700        | 2000        | 3500        | Alteration mineral, irreversible dissolution                                |
| 5.9                                    | Vermiculite 3                                          | 4500        | 3840        | 1700        | 2000        | 3500        | Irreversible dissolution                                                    |
| 5.10                                   | Fe-Chlorite                                            | 4500        | 3800        | 1700        | 2000        | 3500        | Irreversible dissolution                                                    |
| 5.14                                   | Fe-Mg-Chlorite                                         | <b>4520</b> | 3500        | 1700        | 1800        | 3500        | Irreversible dissolution                                                    |
| 5.17                                   | Mg-Chlorite                                            | <b>4500</b> | <b>1400</b> | 1700        | 1700        | 3500        | Irreversible dissolution                                                    |
| 5.19                                   | Muscovite                                              | <b>3038</b> | 3800        | 1700        | 2000        | <b>4656</b> | Irreversible dissolution                                                    |
| 5.21                                   | Illite 1                                               | 4500        | 3800        | 1700        | 2000        | 3500        | Alteration mineral, irreversible dissolution                                |
| 5.22                                   | Illite 2                                               | 4500        | 3800        | 1700        | 2000        | 3500        | Alteration mineral, irreversible dissolution                                |
| 5.23                                   | Illite 3                                               | 4500        | 3800        | 1700        | 2000        | 3500        | Irreversible dissolution                                                    |
| 5.24                                   | Montmorillonite                                        | 4300        | <b>3840</b> | 1700        | 2000        | 3500        | Alteration mineral, irreversible dissolution                                |
| 5.27                                   | All other phyllosilicates                              | 4410        | <b>3770</b> | 1700        | 2000        | 3500        | Irreversible dissolution                                                    |
| 7. Cyclosilicates                      |                                                        |             |             |             |             |             |                                                                             |
| 6.1                                    | Tourmaline                                             | <b>3600</b> | <b>3100</b> | 1700        | 1800        | 2500        | Irreversible dissolution                                                    |
| 6.2                                    | Cordierite                                             | <b>2600</b> | <b>5900</b> | 1700        | 2000        | 2000        | Irreversible dissolution                                                    |
| 6.3                                    | All other cyclosilicates                               | <b>3100</b> | <b>4500</b> | 1700        | 1900        | 2250        | Irreversible dissolution                                                    |
| 8. Sorosilicates                       |                                                        |             |             |             |             |             |                                                                             |
| 7.1                                    | Epidote                                                | <b>5330</b> | <b>3800</b> | 1700        | 2000        | 2300        | Irreversible dissolution                                                    |
| 7.2                                    | Zoisite                                                | <b>4400</b> | 3900        | 1800        | 2200        | 3300        | Irreversible dissolution                                                    |
| 7.3                                    | All other sorosilicates                                | 4375        | 3850        | 1750        | 2100        | 3300        | Irreversible dissolution                                                    |
| 10. Oxides and simple aluminosilicates |                                                        |             |             |             |             |             |                                                                             |
| 8.1                                    | Kaolinite                                              | <b>5310</b> | <b>3580</b> | 1700        | 2000        | <b>4100</b> | Irreversible dissolution, gibbsite possible outcome                         |
| 8.2                                    | Gibbsite                                               | <b>3400</b> | <b>3600</b> | 1700        | 2000        | <b>3170</b> | Alteration mineral, irreversible dissolution                                |
| 8.3                                    | Quartz                                                 | <b>3890</b> | n.a.        | <b>2200</b> | 2000        | <b>3320</b> | Reversible reactions, back reaction, dissolution is kinetically limited     |
| 11. Volcanic glasses                   |                                                        |             |             |             |             |             |                                                                             |
| 9.1                                    | Volcanic glass, base cation poor                       | <b>3890</b> | <b>3010</b> | 2400        | 2800        | 2700        | Irreversible dissolution                                                    |
| 9.2                                    | Volcanic glass, base cation rich                       | <b>4500</b> | <b>3310</b> | 2500        | 2800        | 3400        | Irreversible dissolution                                                    |
| 9.3                                    | All other volcanic glasses                             | 4200        | 3110        | 2450        | 2800        | 3050        | Irreversible dissolution                                                    |
| 10 Carbonates                          |                                                        |             |             |             |             |             |                                                                             |
| 10.1                                   | Calcite and limestones                                 | <b>444</b>  | <b>1180</b> | <b>2180</b> | <b>2200</b> | -           | Reversible reaction, Back reaction important                                |
| 10.2                                   | Aragonite                                              | <b>530</b>  | <b>1210</b> | <b>2200</b> | <b>2400</b> | -           | Reversible reaction, Back reaction important                                |
| 10.3                                   | Dolomite                                               | <b>1880</b> | <b>2700</b> | <b>1800</b> | <b>2200</b> | -           | Irreversible dissolution. Back reaction to calcite and magnesite            |
| 10.5                                   | Siderite                                               | <b>3300</b> | <b>3500</b> | 1700        | 2000        | 2500        | Irreversible dissolution                                                    |
| 10.6                                   | Rhodochrosite                                          | <b>3300</b> | <b>3500</b> | 1700        | 2000        | 2500        | Irreversible dissolution                                                    |
| 11 Phosphates                          |                                                        |             |             |             |             |             |                                                                             |
| 11.1                                   | Apatite                                                | <b>3500</b> | <b>4000</b> | 1700        | <b>1200</b> | <b>2500</b> | Irreversible dissolution, precipitates with oxalate and aluminium important |
| 11.2                                   | Fluoroapatite                                          | <b>1110</b> | <b>4790</b> | 1700        | 1200        | 2500        | Irreversible dissolution, precipitates with oxalate and aluminium important |
| 11.3                                   | Immobilized inorganic phosphorus, all other phosphorus | <b>2350</b> | <b>4000</b> | 1700        | 1200        | 2200        | Possibly reversible reaction                                                |

| Table 5. Stoichiometry of the minerals applied in Tables 3 and 4.                  |                                                                                                                            |                                                                                                                                                                                            |
|------------------------------------------------------------------------------------|----------------------------------------------------------------------------------------------------------------------------|--------------------------------------------------------------------------------------------------------------------------------------------------------------------------------------------|
| 1a. Feldspars                                                                      |                                                                                                                            |                                                                                                                                                                                            |
|                                                                                    | Mineral                                                                                                                    | Formula                                                                                                                                                                                    |
| 1.1                                                                                | K-Feldspar                                                                                                                 | $\text{KAlSi}_3\text{O}_8 = \text{Or}$                                                                                                                                                     |
| 1.2                                                                                | K-Feldspar I; Orthoclase, K-Feldspar I; Sanidine, 100-90%                                                                  | $\text{Or}_{97}\text{An}_3$                                                                                                                                                                |
| 1.3                                                                                | K-Feldspar II; 90%, Microcline                                                                                             | $\text{Or}_{97}\text{Ab}_2\text{An}_1$                                                                                                                                                     |
| 1.4                                                                                | K-Feldspar II; 80%, Orthoclase                                                                                             | $\text{Or}_{80}\text{Ab}_{20}$                                                                                                                                                             |
| 1.5                                                                                | Anorthoclase                                                                                                               | $\text{Or}_{20}\text{Ab}_{62}\text{An}_{17}$                                                                                                                                               |
| 1.6                                                                                | Albite                                                                                                                     | $\text{NaAlSi}_3\text{O}_8 = \text{Ab}$                                                                                                                                                    |
| 1.7                                                                                | Plagioclase; Oligoclase                                                                                                    | $\text{Ab}_{85}\text{An}_{15}$                                                                                                                                                             |
| 1.8                                                                                | Plagioclase; Labradorite                                                                                                   | $\text{Ab}_{46}\text{An}_{54}$                                                                                                                                                             |
| 1.9                                                                                | Plagioclase; Bytownite                                                                                                     | $\text{Ab}_{22}\text{An}_{78}$                                                                                                                                                             |
| 1.10                                                                               | Plagioclase; feldparic Anorthite                                                                                           | $\text{Ab}_6\text{An}_{94}$                                                                                                                                                                |
| 1b. Zeolites with techtosilicate structure                                         |                                                                                                                            |                                                                                                                                                                                            |
| 1.12                                                                               | Helulandite                                                                                                                | $(\text{Ca}, \text{Na})_{0.45}\text{Al}_{0.89}\text{Si}_{3.1}\text{O}_8 \cdot 2.7 \text{ H}_2\text{O}$                                                                                     |
| 1.13                                                                               | Analcime                                                                                                                   | $\text{NaAlSi}_2\text{O}_6 \cdot \text{H}_2\text{O}$                                                                                                                                       |
| 1.14                                                                               | Clinoptilolite                                                                                                             | $(\text{Na}, \text{K}, \text{Ca})_{2-3}\text{Al}_3(\text{Al}, \text{Si})_2\text{Si}_{13}\text{O}_{36} \cdot 12\text{H}_2\text{O}$                                                          |
| 1.15                                                                               | Stilbite                                                                                                                   | $\text{Na}_{0.09}\text{Ca}_{0.66}\text{AlSi}_3\text{O}_8 \cdot 3.1 \text{ H}_2\text{O}$                                                                                                    |
| 2. Nesosilicates                                                                   |                                                                                                                            |                                                                                                                                                                                            |
| 2.1                                                                                | Monticellite                                                                                                               | $\text{CaMgSiO}_4$                                                                                                                                                                         |
| 2.2                                                                                | Tephroite                                                                                                                  | $\text{Mn}_2\text{SiO}_4$                                                                                                                                                                  |
| 2.3                                                                                | Nepheline                                                                                                                  | $(\text{Na}_{0.75}\text{K}_{0.25})\text{AlSiO}_4$                                                                                                                                          |
| 2.4                                                                                | Anorthite                                                                                                                  | $\text{CaAl}_2\text{Si}_2\text{O}_8 = \text{An}$                                                                                                                                           |
| 2.5                                                                                | Forsterite                                                                                                                 | $\text{Mg}_2\text{SiO}_4$                                                                                                                                                                  |
| 2.6                                                                                | San Carlos, Arizona Forsterite<br>Salem, Tamil Nadu Indian olivine<br>Norwegian Olivine ( $\text{Fo}_{65}\text{Fa}_{35}$ ) | $\text{Mg}_{1.81}\text{Fe}_{0.19}\text{SiO}_4$<br>$\text{Mg}_{1.84}\text{Fe}_{0.16}\text{SiO}_4$<br>$\text{Mg}_{1.5}\text{Fe}_{0.35}\text{Al}_{0.02}\text{Si}_{1.04}\text{O}_4$            |
| 2.7                                                                                | Fayalite                                                                                                                   | $\text{Fe}_2\text{SiO}_4$                                                                                                                                                                  |
| 2.8-2.12                                                                           | Generic garnet, continuous series                                                                                          | $\text{Al}_{44}\text{Py}_{44}\text{Gr}_{12}, \text{Al}_{65}\text{Py}_{35}, \text{Ad}_{80}\text{Gr}_{20}, \text{Al}_{50}\text{Py}_{40}\text{Gr}_{10}, \text{Gr}_{88}\text{Py}_6\text{Ad}_6$ |
| 2.13                                                                               | Grossular                                                                                                                  | $\text{Ca}_3\text{Al}_2(\text{SiO}_4)_3;$                                                                                                                                                  |
| 2.14                                                                               | Almandine = Al                                                                                                             | $\text{Fe}_3\text{Al}_2(\text{SiO}_4)_3$                                                                                                                                                   |
| 2.15                                                                               | Spessartine = Sp                                                                                                           | $\text{Mn}_3\text{Al}_2(\text{SiO}_4)_3$                                                                                                                                                   |
| 2.16                                                                               | Andradite = Ad                                                                                                             | $\text{Ca}_3\text{Fe}_2(\text{SiO}_4)_3$                                                                                                                                                   |
| 2.17                                                                               | Uvarovite = Uv                                                                                                             | $\text{Ca}_3\text{Cr}_2(\text{SiO}_4)_3$                                                                                                                                                   |
| 2.18                                                                               | Pyrope = Py                                                                                                                | $\text{Mg}_3\text{Al}_2(\text{SiO}_4)_3$                                                                                                                                                   |
| 2.19                                                                               | Staurolite                                                                                                                 | $\text{Mg}_{0.2}\text{Fe}_{1.2}\text{Al}_{7.4}\text{Si}_{4.3}\text{O}_{22}(\text{OH})_2$                                                                                                   |
| 2.20                                                                               | Disthene                                                                                                                   | $\text{Al}_2\text{SiO}_5$                                                                                                                                                                  |
| 2.21                                                                               | Kyanite                                                                                                                    | $\text{Al}_2\text{SiO}_5$                                                                                                                                                                  |
| 2.223. Pyroxenes (End members are diopside, hedenbergite, enstatite, ferrosillite) |                                                                                                                            |                                                                                                                                                                                            |
| 3.1                                                                                | Alite (T-slag, K-slag)                                                                                                     | $\text{Ca}_3\text{SiO}_5$ or $(\text{CaO})_3\text{SiO}_2$                                                                                                                                  |

|                    |                                                        |                                                                                                                                                                                   |
|--------------------|--------------------------------------------------------|-----------------------------------------------------------------------------------------------------------------------------------------------------------------------------------|
| 3.2                | Wollastonite ( $\text{Ca}_{22}\text{Si}_2\text{O}_6$ ) | $\text{Ca}_{1.7}\text{Mg}_{0.11}\text{Si}_{2.2}\text{O}_6$                                                                                                                        |
| 3.3                | Spodumene ( $\text{LiAlSi}_2\text{O}_6$ )              | $\text{LiAl}_{0.86}\text{Fe}_{0.3}\text{Si}_2\text{O}_6$                                                                                                                          |
| 3.4                | Diopside ( $\text{CaMgSi}_2\text{O}_6$ )               | $\text{Ca}_{1.04}\text{Mg}_{1.0}\text{Al}_{0.02}\text{Fe}_{0.01}\text{Si}_{2.03}\text{O}_6$ , $\text{Ca}_{0.8}\text{Mg}_{0.8}\text{Fe}_{0.2}\text{Al}_{0.2}\text{Si}_2\text{O}_6$ |
| 3.5                | Jadeite ( $\text{NaAlSi}_2\text{O}_6$ )                | $\text{Na}_{1.0}\text{Ca}_{0.2}\text{Fe}_{0.3}\text{AlSi}_2\text{O}_6$                                                                                                            |
| 3.6                | Leucite ( $\text{KAlSi}_2\text{O}_6$ )                 | $\text{Na}_{0.05}\text{K}_{1.09}\text{Al}_{1.15}\text{Si}_{2.3}\text{O}_6$                                                                                                        |
| 3.7                | Augite I                                               | $\text{He}_{55}\text{En}_{45}$                                                                                                                                                    |
| 3.8                | Augite II                                              | $\text{En}_{51}\text{Wo}_{39}\text{He}_{10}$                                                                                                                                      |
| 3.9                | Hedenbergite ( $\text{CaFeSi}_2\text{O}_6$ )           | $\text{Ca}_{0.4}\text{Mg}_{0.7}\text{Fe}_{0.09}\text{Al}_{0.15}\text{Si}_{1.86}\text{O}_6$                                                                                        |
| 3.10               | Augite III                                             | $\text{Ca}_{0.86}\text{Mg}_{1.0}\text{Fe}_{0.02}\text{Si}_2\text{O}_6$                                                                                                            |
| 3.11               | Enstatite ( $\text{Mg}_2\text{Si}_2\text{O}_6$ )       | $\text{Mg}_{1.7}\text{Fe}_{0.3}\text{Si}_2\text{O}_6$                                                                                                                             |
| 3.12               | Hypersthene                                            | $\text{MgFeSi}_2\text{O}_6$ ( $\text{En}_{50}\text{Fs}_{50}$ )                                                                                                                    |
| 3.13               | Ferrosilite                                            | $\text{Fe}_2\text{Si}_2\text{O}_6$                                                                                                                                                |
| 3.14               | Bronzite (mixed)                                       | $\text{Mg}_{1.54}\text{Fe}_{0.42}\text{Ca}_{0.2}\text{Si}_{1.9}\text{O}_6$ ( $\text{En}_{70}\text{He}_{10}\text{Fs}_{20}$ )                                                       |
| 3.15               | Pidgeonite                                             | $\text{Mg}_{50}\text{Ca}_{15}\text{Fe}_{35}\text{Si}_2\text{O}_6$                                                                                                                 |
| 3.16               | Mixed pyroxenes                                        | $\text{Ca}_{0.8}\text{Mg}_{0.9}\text{Fe}_{0.3}\text{Al}_{0.04}\text{Si}_2\text{O}_6$ ( $\text{DixEnyFsZHew}$ )                                                                    |
| 4. Amphiboles      |                                                        |                                                                                                                                                                                   |
| 4.1                | Glaucofane                                             | $\text{Na}_2\text{MgFe}_2\text{Al}_2\text{Si}_8\text{O}_{22}(\text{OH})_2$                                                                                                        |
| 4.2                | Pargasite                                              | $\text{NaCa}_2(\text{Mg}_4\text{Al})(\text{Si}_6\text{Al}_2)\text{O}_{22}(\text{OH})_2$                                                                                           |
| 4.3                | Hornblende I (Norwegian)                               | $\text{Ca}_{2.1}\text{Mg}_{4.5}\text{Na}_{0.08}\text{Al}_{2.1}\text{Si}_7\text{O}_{22}(\text{OH})_2(\text{PO}_4)_{0.01}$                                                          |
| 4.4                | Hornblende II (Canadian)                               | $\text{Ca}_{2.0}\text{Mg}_{4.0}\text{Na}_{0.16}\text{Al}_{0.4}\text{Si}_{8.3}\text{O}_{22}(\text{OH})_2$                                                                          |
| 4.5                | Tremolite                                              | $\text{Ca}_2\text{Mg}_5\text{Si}_8\text{O}_{22}(\text{OH})_2$                                                                                                                     |
| 4.6                | Riebeckite                                             | $\text{Na}_2\text{Fe}^{2+}_3\text{Fe}^{3+}_2\text{Si}_8\text{O}_{22}(\text{OH})_2$                                                                                                |
| 4.7                | Anthophyllite                                          | $\text{Mg}_{5.7}\text{FeAl}_{0.1}\text{Si}_{7.8}\text{O}_{22}(\text{OH})_2$                                                                                                       |
| 4.8                | Other amphiboles                                       | Various compositions                                                                                                                                                              |
| 5. Phyllosilicates |                                                        |                                                                                                                                                                                   |
| 5.1                | Glauconite                                             | $(\text{K},\text{Na})(\text{Fe}^{3+},\text{Al},\text{Mg})_2(\text{Si},\text{Al})_4\text{O}_{10}(\text{OH})_2$                                                                     |
| 5.2                | Serpentine, Antigorite, Chrysotile                     | $\text{Mg}_{4.1}\text{Fe}_{0.4}\text{Al}_{0.15}\text{Si}_{2.8}\text{O}_{10}(\text{OH})_{4..}$ , $(\text{Mg}, \text{Fe})_3\text{Si}_2\text{O}_5(\text{OH})_4$                      |
| 5.3                | Talc                                                   | $\text{Mg}_{2.8}\text{Fe}_{0.18}\text{Si}_4\text{O}_{10}(\text{OH})_3$                                                                                                            |
| 5.4                | Nontronite                                             | $\text{Ca}_5(\text{Si}_7\text{Al}_8\text{Fe}_2)(\text{Fe}_{3.5}\text{Al}_4\text{Mg}_1)\text{O}_{20}(\text{OH})_4$                                                                 |
| 5.5                | Phlogopite                                             | $\text{K}_{1.0}\text{Mg}_3\text{Al}_{1.0}\text{Si}_3\text{O}_{10}(\text{OH})_2$                                                                                                   |
| 5.6                | Biotite                                                | $\text{K}_{0.9}\text{Mg}_{1.9}\text{Fe}_{1.1}\text{Al}_{1.0}\text{Na}_{0.1}\text{Si}_3\text{O}_{10}(\text{OH})_2$                                                                 |
| 5.7                | Mg-Vermiculite I                                       | $\text{K}_{0.5}\text{Mg}_{1.5}\text{Fe}_{1.1}\text{Al}_{1.7}\text{Na}_{0.05}\text{Si}_3\text{O}_{10}(\text{OH})_2$                                                                |
| 5.8                | Mg-Vermiculite II                                      | $\text{K}_{0.3}\text{Mg}_{1.7}\text{Fe}_{1.1}\text{Al}_{1.5}\text{Si}_3\text{O}_{10}(\text{OH})_2$                                                                                |
| 5.9                | Mg-Vermiculite III                                     | $\text{K}_{0.1}\text{Mg}_{0.5}\text{Fe}_{1.1}\text{Al}_2\text{Si}_3\text{O}_{10}(\text{OH})_2$                                                                                    |
| 5.10               | Fe-Vermiculite                                         | $(\text{Mg}, \text{Fe}^{2+}, \text{Fe}^{3+})_3[(\text{Al}, \text{Si})_4\text{O}_{10}](\text{OH})_2 \cdot 4\text{H}_2\text{O}$                                                     |
| 5.11               | Illitic vermiculite                                    | $\text{K}_{0.35}\text{Mg}_{0.11}\text{Ca}_{0.03}\text{Al}_{2.13}\text{Fe}_{0.32}\text{Ti}_{0.07}\text{Si}_{3.4}\text{O}_{10}(\text{OH})_2$                                        |
| 5.12               | Vermiculite Al-OH interlayer mineral                   | $(\text{Mg}, \text{Al}, \text{Fe}^{2+})_3(\text{Si}, \text{Al})_4\text{O}_{10}(\text{OH})_2 \cdot n\text{H}_2\text{O}$                                                            |
| 5.13               | Fe-Chlorite V, Chamosite                               | $\text{Fe}_5\text{Al}_2\text{Si}_3\text{O}_{10}(\text{OH})_8$                                                                                                                     |
| 5.14               | Chlorite IV (mixed)                                    | $\text{Mg}_{0.7}\text{Fe}_{2.7}\text{Al}_{2.3}\text{Si}_3\text{O}_{10}(\text{OH})_8$                                                                                              |
| 5.15               | Chlorite III (mixed)                                   | $\text{Mg}_2\text{Fe}_3\text{Al}_2\text{Si}_3\text{O}_{10}(\text{OH})_8$                                                                                                          |

|                         |                                  |                                                                                                                                   |
|-------------------------|----------------------------------|-----------------------------------------------------------------------------------------------------------------------------------|
| 5.16                    | Chlorite II (mixed)              | $\text{Mg}_{4.9}\text{Fe}_{0.6}\text{Al}_{1.4}\text{Si}_3\text{O}_{10}(\text{OH})_8$                                              |
| 5.17                    | Mg-Chlorite I, Clinochlore       | $\text{Mg}_5\text{Al}_2\text{Si}_3\text{O}_{10}(\text{OH})_8$                                                                     |
| 5.18                    | Smectite                         | $\text{Ca}_{0.2}\text{Mg}_{1.0}\text{Na}_{0.13}\text{Al}_{1.0}\text{Si}_4\text{O}_{10}(\text{OH})_2$                              |
| 5.19                    | Muscovite                        | $\text{KAl}_3\text{Si}_3\text{O}_{10}\text{OH}_2$                                                                                 |
| 5.20                    | Muscovite (mixed)                | $\text{K}_{0.9}\text{Na}_{0.02}\text{Mg}_{0.3}\text{Fe}_{0.4}\text{Al}_{2.7}\text{Si}_{3.5}\text{O}_{10}(\text{OH})_2$            |
| 5.21                    | Illite I                         | $\text{K}_0\text{Mg}_{0.28}\text{Fe}_{0.3}\text{Al}_{2.6}\text{Si}_{3.3}\text{O}_{10}(\text{OH})_2$                               |
| 5.22                    | Illite II                        | $\text{K}_{0.7}\text{Mg}_{0.26}\text{Fe}_{0.1}\text{Al}_{2.5}\text{Si}_{3.1}\text{O}_{10}(\text{OH})_2$                           |
| 5.23                    | Illite III                       | $\text{K}_{0.6}\text{Mg}_{0.25}\text{Al}_{2.3}\text{Si}_3\text{O}_{10}(\text{OH})_2$                                              |
| 5.24                    | Montmorillonite                  | $\text{Ca}_{0.2}\text{Mg}_{1.0}\text{Na}_{0.13}\text{Al}_{1.0}\text{Si}_4\text{O}_{10}(\text{OH})_2$                              |
| 5.25                    | Bentonite                        | See illite                                                                                                                        |
| 5.26                    | Sericite                         | $\text{KAl}_2\text{Si}_3\text{O}_{10}(\text{OH})_2$                                                                               |
| 6. Cyclosilicate        |                                  |                                                                                                                                   |
| 6.1                     | Tourmaline                       | $\text{Ca}_{1.0}\text{Fe}_3\text{MgAl}_5\text{Si}_6\text{O}_{18}(\text{BO}_3)_3(\text{OH})_4(\text{PO}_4)_{0.01}$                 |
| 6.2                     | Cordierite                       | $\text{Ca}_{3.5}\text{Fe}_{0.07}\text{K}_{0.09}\text{Al}_{3.3}\text{Si}_{4.6}\text{O}_{18}$                                       |
| 7. Sorosilicates        |                                  |                                                                                                                                   |
| 7.1                     | Epidote                          | $\text{Ca}_{1.5}\text{K}_{0.46}\text{Fe}_{0.74}\text{Al}_{1.5}\text{Si}_{3.4}\text{O}_{12}(\text{OH})$                            |
| 7.2                     | Zoisite (Clino-)                 | $\text{Ca}_{2.2}\text{Fe}_{0.13}\text{Al}_{1.5}\text{Si}_{3.2}\text{O}_{12}(\text{OH})$                                           |
| 8. Clay minerals        |                                  |                                                                                                                                   |
| 8.1                     | Kaolinite                        | $\text{Al}_2\text{Si}_2\text{O}_5(\text{OH})_4$                                                                                   |
| 8.2                     | Gibbsite                         | $\text{Al}(\text{OH})_3$                                                                                                          |
| 8.3                     | Quartz                           | $\text{SiO}_2$                                                                                                                    |
| 9. Glasses              |                                  |                                                                                                                                   |
| 9.1                     | Volcanic glass, base cation poor | $\text{Ca}_{0.2}\text{Mg}_{0.2}\text{K}_{0.4}\text{Na}_{0.4}\text{Al}_{0.8}\text{Si}_3\text{O}_8$                                 |
| 9.2                     | Volcanic glass, base cation rich | $\text{Ca}_{0.62}\text{Mg}_{0.53}\text{K}_{0.27}\text{Na}_{0.27}\text{Al}_{0.66}\text{Si}_{2.68}\text{O}_8$                       |
| 10. Carbonates          |                                  |                                                                                                                                   |
| 10.1a                   | Calcite (Ca)                     | $(\text{CaCO}_3)_{99.9}(\text{Ca}_5(\text{PO}_4)_3(\text{OH}))_{0.1}$                                                             |
| 10.1b                   | Köping limestone                 | $\text{Ca}_{97}\text{Do}_2\text{Ma}_1\text{Ap}_{0.1}$                                                                             |
| 10.1c                   | Red Öland limestone              | $\text{Ca}_{97}\text{Do}_1\text{Sd}_2\text{Ap}_{0.1}$                                                                             |
| 10.1d                   | Ignaberga limestone              | $\text{Ca}_{50}\text{Ar}_{45}\text{Do}_1\text{Sd}_2\text{Ap}_{0.5}$                                                               |
| 10.2                    | Aragonite (Ar)                   | $(\text{CaCO}_3)_{99.9}(\text{Ca}_5(\text{PO}_4)_3(\text{OH}))_{0.1}$                                                             |
| 10.3                    | Dolomite (Do)                    | $(\text{CaMg}(\text{CO}_3)_2)_{99.9}(\text{Ca}_5(\text{PO}_4)_3(\text{OH}))_{0.1}$                                                |
| 10.4                    | Magnesite (Ma)                   | $\text{MgCO}_3$                                                                                                                   |
| 10.6                    | Rhodochrosite                    | $\text{MnCO}_3$                                                                                                                   |
| 10.5                    | Siderite (Sd)                    | $\text{FeCO}_3$                                                                                                                   |
| 11. Phosphorus minerals |                                  |                                                                                                                                   |
| 11.1                    | Apatite (Ap)                     | $\text{Ca}_5(\text{PO}_4)_3(\text{OH})$                                                                                           |
| 11.2                    | Fluoroapatite                    | $\text{Ca}_5(\text{PO}_4)_3(\text{OH}_{0.7}\text{F}_{0.3})$                                                                       |
| 11.3                    | Immobilized inorganic phosphorus | Unknown, assume as semi-apatite $(\text{Ca}_3\text{AlFe}_{0.5})_5(\text{PO}_4)(\text{F}_{0.1}\text{OH}_{0.4}(\text{CO}_3)_{0.5})$ |
